# Supplementary material for: Adaptations of Alteromonas sp. 76-1 to Polysaccharide Degradation: A CAZyme Plasmid for Ulvan Degradation and Two Alginolytic Systems
Source: Front Microbiol. 2019 Mar 18;10:504. doi: 10.3389/fmicb.2019.00504 (PMC6431674; doi:10.3389/fmicb.2019.00504)
Supplement: TABLE S2 — Sheet Alt761_CDS: Complete list of protein-coding sequences of Alteromonas sp. 76-1 including CAZyme prediction using dbCAN2, KEGG annotation using KAAS, and protease/peptidase prediction using MEROPS. Sheet Uniques_Alt761_SN2: Unique genes and associated KEGG classifications in Alteromonas strains 76-1 and SN2, including CAZyme prediction using dbCAN2 and KEGG annotation using KAAS. [file Table_2.XLSX]

## Sheet: Alt761_CDS
Locus Tag	Gene Product Name	dbCAN2	dbCAN2 evalue	Knumber	KEGG_annotation	KEGG_pathway	KEGG_class	MEROPS	MEROPS prediction	MEROPS evalue
alt76_00001	chromosomal replication initiator protein	NA	NA	K02313	dnaA; chromosomal replication initiator protein	Cell cycle - Caulobacter [PATH:ko04112]	Cell growth and death
alt76_00002	DNA polymerase III beta subunit	NA	NA	K02338	DPO3B, dnaN; DNA polymerase III subunit beta	DNA replication proteins [BR:ko03032]	Replication and repair
alt76_00003	DNA replication and repair protein RecF	NA	NA	K03629	recF; DNA replication and repair protein RecF	DNA repair and recombination proteins [BR:ko03400]	Replication and repair
alt76_00004	DNA gyrase subunit B	NA	NA	K02470	gyrB; DNA gyrase subunit B	DNA repair and recombination proteins [BR:ko03400]	Replication and repair
alt76_00005	hypothetical protein	NA	NA	NA	NA	NA	NA
alt76_00006	glycyl-tRNA synthetase beta chain	NA	NA	K01879	glyS; glycyl-tRNA synthetase beta chain	Amino acid related enzymes [BR:ko01007]	Amino acid metabolism
alt76_00007	glycyl-tRNA synthetase alpha chain	NA	NA	K01878	glyQ; glycyl-tRNA synthetase alpha chain	Aminoacyl-tRNA biosynthesis [PATH:ko00970]	Translation
alt76_00008	DNA-3-methyladenine glycosylase I	NA	NA	K01246	tag; DNA-3-methyladenine glycosylase I	DNA repair and recombination proteins [BR:ko03400]	Replication and repair
alt76_00009	uncharacterized protein DUF2489	NA	NA	NA	NA	NA	NA
alt76_00010	hypothetical protein	NA	NA	NA	NA	NA	NA
alt76_00011	cytochrome c553	NA	NA	NA	NA	NA	NA
alt76_00012	cell division checkpoint GTPase YihA	NA	NA	K03978	engB; GTP-binding protein	Chromosome and associated proteins [BR:ko03036]	Replication and repair
alt76_00013	DNA polymerase I	NA	NA	K02335	DPO1, polA; DNA polymerase I	Nucleotide excision repair [PATH:ko03420]	Replication and repair
alt76_00014	enhancing lycopene biosynthesis protein 2	NA	NA	NA	NA	NA	NA
alt76_00015	trk system potassium uptake protein TrkH	NA	NA	K03498	trkH, trkG, ktrB; trk system potassium uptake protein	Transporters [BR:ko02000]	Membrane transport
alt76_00016	TraT complement resistance protein	NA	NA	NA	NA	NA	NA
alt76_00017	hypothetical protein	NA	NA	NA	NA	NA	NA
alt76_00018	trk system potassium uptake protein TrkA	NA	NA	K03499	trkA, ktrA; trk system potassium uptake protein	Transporters [BR:ko02000]	Membrane transport
alt76_00019	16S rRNA m(5)C-967 methyltransferase	NA	NA	K03500	rsmB, sun; 16S rRNA (cytosine967-C5)-methyltransferase	Ribosome biogenesis [BR:ko03009]	Translation
alt76_00020	methionyl-tRNA formyltransferase	NA	NA	K00604	MTFMT, fmt; methionyl-tRNA formyltransferase	Aminoacyl-tRNA biosynthesis [PATH:ko00970]	Translation
alt76_00021	peptide deformylase	NA	NA	K01462	PDF, def; peptide deformylase	Others	Metabolism
alt76_00022	LysM domain-containing protein	NA	NA	NA	NA	NA	NA
alt76_00023	DNA processing protein	NA	NA	K04096	smf; DNA processing protein	Replication, recombination and repair proteins	Genetic information processing
alt76_00024	Smg protein	NA	NA	K03747	smg; Smg protein	General function prediction only	Poorly characterized
alt76_00025	putative DNA topoisomerase	NA	NA	K07479	yrdD; putative DNA topoisomerase	Replication, recombination and repair proteins	Genetic information processing
alt76_00026	translation factor SUA5	NA	NA	K07566	tsaC, rimN, SUA5; L-threonylcarbamoyladenylate synthase	Ribosome biogenesis [BR:ko03009]	Translation
alt76_00027	coproporphyrinogen oxidase	NA	NA	K00228	CPOX, hemF; coproporphyrinogen III oxidase	Porphyrin and chlorophyll metabolism [PATH:ko00860]	Metabolism of cofactors and vitamins
alt76_00028	outer membrane protein	NA	NA	K07275	ompW; outer membrane protein	Membrane and intracellular structural molecules	Cellular processes and signaling
alt76_00029	hemoglobin	NA	NA	K06886	glbN; hemoglobin	General function prediction only	Poorly characterized
alt76_00030	shikimate dehydrogenase	NA	NA	K00014	aroE; shikimate dehydrogenase	Phenylalanine, tyrosine and tryptophan biosynthesis [PATH:ko00400]	Amino acid metabolism
alt76_00031	carbonic anhydrase/acetyltransferase-like protein (isoleucine patch superfamily)	NA	NA	NA	NA	NA	NA
alt76_00035	calcineurin-like phosphoesterase family protein	NA	NA	NA	NA	NA	NA
alt76_00036	putative membrane protein	NA	NA	NA	NA	NA	NA
alt76_00040	lipid A 3-O-deacylase PagL	NA	NA	NA	NA	NA	NA
alt76_00041	hypothetical protein	NA	NA	NA	NA	NA	NA
alt76_00042	hypothetical protein	NA	NA	NA	NA	NA	NA
alt76_00043	DNA polymerase III alpha subunit	NA	NA	K14162	dnaE2; error-prone DNA polymerase	DNA repair and recombination proteins [BR:ko03400]	Replication and repair
alt76_00044	protein ImuB	NA	NA	K14161	imuB; protein ImuB	DNA repair and recombination proteins [BR:ko03400]	Replication and repair
alt76_00045	hypothetical protein	NA	NA	NA	NA	NA	NA
alt76_00046	hypothetical protein	NA	NA	NA	NA	NA	NA
alt76_00047	uncharacterized protein (DUF885 family)	NA	NA	NA	NA	NA	NA
alt76_00048	hypothetical protein	NA	NA	NA	NA	NA	NA
alt76_00049	Zn-dependent M28 family amino/carboxypeptidase	NA	NA	K06503	TFRC, CD71; transferrin receptor	Endocytosis [PATH:ko04144]	Transport and catabolism	MER0238997	subfamily M28F unassigned peptidases	1.7e-185
alt76_00050	putative rhamnosyltransferase	NA	NA	NA	NA	NA	NA
alt76_00051	TetR family transcriptional regulator	NA	NA	K05501	slmA, ttk; TetR/AcrR family transcriptional regulator	Chromosome and associated proteins [BR:ko03036]	Replication and repair
alt76_00052	phosphopantothenate-cysteine ligase /phosphopantothenoylcysteine decarboxylase	NA	NA	K13038	coaBC, dfp; phosphopantothenoylcysteine decarboxylase / phosphopantothenate---cysteine ligase	Pantothenate and CoA biosynthesis [PATH:ko00770]	Metabolism of cofactors and vitamins
alt76_00053	DNA replication and repair protein RadC	NA	NA	K03630	radC; DNA repair protein RadC	Replication, recombination and repair proteins	Genetic information processing
alt76_00054	hypothetical protein	NA	NA	NA	NA	NA	NA
alt76_00055	group 4 capsule polysaccharide lipoprotein GfcB/YjbF	NA	NA	NA	NA	NA	NA
alt76_00056	capsule biosynthesis protein GfcC	NA	NA	NA	NA	NA	NA
alt76_00057	exopolysaccharide biosynthesis protein YbjH	NA	NA	NA	NA	NA	NA
alt76_00058	glycerol-3-phosphate cytidylyltransferase	NA	NA	K00980	tagD; glycerol-3-phosphate cytidylyltransferase	Glycerophospholipid metabolism [PATH:ko00564]	Lipid metabolism
alt76_00059	CDP-glycerol:poly(glycerophosphate) glycerophosphotransferase	NA	NA	NA	NA	NA	NA
alt76_00060	LSU ribosomal protein L28P	NA	NA	K02902	RP-L28, MRPL28, rpmB; large subunit ribosomal protein L28	Ribosome [PATH:ko03010]	Translation
alt76_00061	LSU ribosomal protein L33P	NA	NA	K02913	RP-L33, MRPL33, rpmG; large subunit ribosomal protein L33	Ribosome [PATH:ko03010]	Translation
alt76_00062	hypothetical protein	NA	NA	NA	NA	NA	NA
alt76_00063	DNA-(apurinic or apyrimidinic site) lyase	NA	NA	K10563	mutM, fpg; formamidopyrimidine-DNA glycosylase	Base excision repair [PATH:ko03410]	Replication and repair
alt76_00064	phosphopantetheine adenylyltransferase	NA	NA	K00954	E2.7.7.3A, coaD, kdtB; pantetheine-phosphate adenylyltransferase	Pantothenate and CoA biosynthesis [PATH:ko00770]	Metabolism of cofactors and vitamins
alt76_00065	3-deoxy-D-manno-octulosonic acid kinase	NA	NA	K11211	kdkA; 3-deoxy-D-manno-octulosonic acid kinase	Lipopolysaccharide biosynthesis [PATH:ko00540]	Glycan biosynthesis and metabolism
alt76_00066	heptosyltransferase I	GT9	2.6e-52	K12982	opsX; heptosyltransferase I	Lipopolysaccharide biosynthesis proteins [BR:ko01005]	Glycan biosynthesis and metabolism
alt76_00067	periplasmic binding family protein	NA	NA	NA	NA	NA	NA
alt76_00068	hypothetical protein	NA	NA	NA	NA	NA	NA
alt76_00069	diguanylate cyclase/phosphodiesterase	NA	NA	NA	NA	NA	NA
alt76_00070	2-amino-3-ketobutyrate coenzyme A ligase	NA	NA	K00639	kbl, GCAT; glycine C-acetyltransferase	Amino acid related enzymes [BR:ko01007]	Amino acid metabolism
alt76_00071	L-threonine 3-dehydrogenase	NA	NA	K00060	tdh; threonine 3-dehydrogenase	Glycine, serine and threonine metabolism [PATH:ko00260]	Amino acid metabolism
alt76_00072	thiosulfate sulfurtransferase	NA	NA	K02439	glpE; thiosulfate sulfurtransferase	Sulfur metabolism [PATH:ko00920]	Energy metabolism	MER0250197	GlpG peptidase ({Escherichia}-type)	3.9e-112
alt76_00073	GlpG protein	NA	NA	K02441	glpG; GlpG protein	General function prediction only	Poorly characterized	MER0048754	Mername-AA306 protein	1.0e-192
alt76_00074	flagellar FliL protein	NA	NA	K02415	fliL; flagellar FliL protein	Bacterial motility proteins [BR:ko02035]	Cell motility
alt76_00075	chorismate lyase	NA	NA	K03181	ubiC; chorismate--pyruvate lyase	Ubiquinone and other terpenoid-quinone biosynthesis [PATH:ko00130]	Metabolism of cofactors and vitamins
alt76_00076	4-hydroxybenzoate polyprenyltransferase	NA	NA	K03179	ubiA; 4-hydroxybenzoate polyprenyltransferase	Prenyltransferases [BR:ko01006]	Metabolism of terpenoids and polyketides
alt76_00077	hypothetical protein	NA	NA	K09806	K09806; uncharacterized protein	Function unknown	Poorly characterized
alt76_00078	ATP-dependent DNA helicase Rep	NA	NA	K03656	rep; ATP-dependent DNA helicase Rep	DNA repair and recombination proteins [BR:ko03400]	Replication and repair
alt76_00079	diguanylate cyclase/phosphodiesterase with GAF sensor	NA	NA	NA	NA	NA	NA
alt76_00080	cytochrome c5	NA	NA	NA	NA	NA	NA
alt76_00082	serine/threonine-protein kinase HipA	NA	NA	K07154	hipA; serine/threonine-protein kinase HipA	Protein kinases [BR:ko01001]	Enzyme families
alt76_00083	HTH-type transcriptional regulator/antitoxin HipB	NA	NA	NA	NA	NA	NA
alt76_00084	transporter (NhaC family)	NA	NA	NA	NA	NA	NA
alt76_00085	DUF2960 family protein	NA	NA	NA	NA	NA	NA
alt76_00086	BCCT family betaine/carnitine transporter	NA	NA	NA	NA	NA	NA
alt76_00087	hypothetical protein	NA	NA	NA	NA	NA	NA
alt76_00088	hypothetical protein	NA	NA	NA	NA	NA	NA
alt76_00089	hypothetical protein	NA	NA	NA	NA	NA	NA
alt76_00090	superfamily II DNA or RNA helicase	NA	NA	NA	NA	NA	NA
alt76_00091	lactate permease	NA	NA	K03303	lctP; lactate permease	Transporters [BR:ko02000]	Membrane transport
alt76_00092	RNA polymerase sigma-70 factor (ECF subfamily)	NA	NA	NA	NA	NA	NA
alt76_00093	FecR family protein	NA	NA	NA	NA	NA	NA
alt76_00094	secretin/TonB-like protein	NA	NA	NA	NA	NA	NA
alt76_00095	imidazolonepropionase-like amidohydrolase	NA	NA	NA	NA	NA	NA
alt76_00096	imidazolonepropionase-like amidohydrolase	NA	NA	NA	NA	NA	NA
alt76_00097	imidazolonepropionase-like amidohydrolase	NA	NA	NA	NA	NA	NA
alt76_00098	N-formylglutamate amidohydrolase	NA	NA	NA	NA	NA	NA
alt76_00099	electron transfer flavoprotein beta subunit	NA	NA	K03521	fixA, etfB; electron transfer flavoprotein beta subunit	Energy metabolism	Metabolism
alt76_00100	electron transfer flavoprotein alpha subunit apoprotein	NA	NA	K03522	fixB, etfA; electron transfer flavoprotein alpha subunit	Exosome [BR:ko04147]	Transport and catabolism
alt76_00101	Fe-S oxidoreductase	NA	NA	K21834	dgcB; dimethylglycine catabolism B	General function prediction only	Poorly characterized
alt76_00102	2,4-dienoyl-CoA reductase-like NADH-dependent reductase (Old Yellow Enzyme family)	NA	NA	K21833	dgcA; dimethylglycine catabolism A	General function prediction only	Poorly characterized
alt76_00103	V4R domain-containing protein	NA	NA	NA	NA	NA	NA
alt76_00104	membrane dipeptidase	NA	NA	NA	NA	NA	NA	MER0627248	family C110 unassigned peptidases	4.4e-11
alt76_00105	AraC family transcriptional regulator with amidase-like domain	NA	NA	K21826	gbdR; AraC family transcriptional regulator, glycine betaine-responsive activator	Transcription factors [BR:ko03000]	Transcription
alt76_00106	Rieske 2Fe-2S family protein	NA	NA	K00479	gbcA; glycine betaine catabolism A	General function prediction only	Poorly characterized
alt76_00107	ferredoxin-NADP reductase	NA	NA	K21832	gbcB; glycine betaine catabolism B	General function prediction only	Poorly characterized
alt76_00108	serine hydroxymethyltransferase	NA	NA	K00600	glyA, SHMT; glycine hydroxymethyltransferase	Antifolate resistance [PATH:ko01523]	Drug resistance
alt76_00109	sarcosine oxidase subunit beta	NA	NA	K00303	soxB; sarcosine oxidase, subunit beta	Glycine, serine and threonine metabolism [PATH:ko00260]	Amino acid metabolism
alt76_00110	sarcosine oxidase subunit delta	NA	NA	K00304	soxD; sarcosine oxidase, subunit delta	Glycine, serine and threonine metabolism [PATH:ko00260]	Amino acid metabolism
alt76_00111	sarcosine oxidase subunit alpha	NA	NA	K00302	soxA; sarcosine oxidase, subunit alpha	Glycine, serine and threonine metabolism [PATH:ko00260]	Amino acid metabolism
alt76_00112	sarcosine oxidase subunit gamma	NA	NA	K00305	soxG; sarcosine oxidase, subunit gamma	Glycine, serine and threonine metabolism [PATH:ko00260]	Amino acid metabolism
alt76_00113	formyltetrahydrofolate deformylase	NA	NA	K01433	purU; formyltetrahydrofolate deformylase	Glyoxylate and dicarboxylate metabolism [PATH:ko00630]	Carbohydrate metabolism
alt76_00114	predicted MFS family arabinose efflux permease	NA	NA	NA	NA	NA	NA
alt76_00115	choline-glycine betaine transporter	NA	NA	NA	NA	NA	NA
alt76_00116	LysR family glycine cleavage system transcriptional activator	NA	NA	NA	NA	NA	NA
alt76_00117	3-hydroxyisobutyrate dehydrogenase	NA	NA	K00020	mmsB, HIBADH; 3-hydroxyisobutyrate dehydrogenase	Valine, leucine and isoleucine degradation [PATH:ko00280]	Amino acid metabolism
alt76_00118	IclR family transcriptional regulator	NA	NA	NA	NA	NA	NA
alt76_00119	lactaldehyde dehydrogenase/glycolaldehyde dehydrogenase	NA	NA	K07248	aldA; lactaldehyde dehydrogenase / glycolaldehyde dehydrogenase	Glyoxylate and dicarboxylate metabolism [PATH:ko00630]	Carbohydrate metabolism
alt76_00120	2-dehydro-3-deoxyphosphogalactonate aldolase	NA	NA	NA	NA	NA	NA
alt76_00121	choline dehydrogenase	AA3_2	6.9e-113	K00108	betA, CHDH; choline dehydrogenase	Glycine, serine and threonine metabolism [PATH:ko00260]	Amino acid metabolism
alt76_00122	gamma-glutamyl-gamma-aminobutyraldehyde dehydrogenase	NA	NA	K12254	kauB; 4-guanidinobutyraldehyde dehydrogenase / NAD-dependent aldehyde dehydrogenase	Arginine and proline metabolism [PATH:ko00330]	Amino acid metabolism
alt76_00123	outer membrane receptor protein involved in Fe transport	NA	NA	NA	NA	NA	NA
alt76_00124	tetratricopeptide repeat protein	NA	NA	NA	NA	NA	NA
alt76_00125	signal transduction histidine kinase	NA	NA	NA	NA	NA	NA
alt76_00126	outer membrane receptor for ferric coprogen and ferric-rhodotorulic acid	NA	NA	K16088	TC.FEV.OM1, fhuE, fpvA, fptA; outer-membrane receptor for ferric coprogen and ferric-rhodotorulic acid	Transporters [BR:ko02000]	Membrane transport
alt76_00127	DNA-binding transcriptional LysR family regulator	NA	NA	NA	NA	NA	NA
alt76_00128	malonate-semialdehyde dehydrogenase (acetylating)/methylmalonate-semialdehyde dehydrogenase	NA	NA	K00140	mmsA, iolA, ALDH6A1; malonate-semialdehyde dehydrogenase (acetylating) / methylmalonate-semialdehyde dehydrogenase	Valine, leucine and isoleucine degradation [PATH:ko00280]	Amino acid metabolism
alt76_00129	3-hydroxyisobutyrate dehydrogenase	NA	NA	K00020	mmsB, HIBADH; 3-hydroxyisobutyrate dehydrogenase	Valine, leucine and isoleucine degradation [PATH:ko00280]	Amino acid metabolism
alt76_00130	HlyD family secretion protein	NA	NA	K01993	ABC-2.TX; HlyD family secretion protein	Membrane and intracellular structural molecules	Cellular processes and signaling
alt76_00131	ribosome-dependent ATPase	NA	NA	K13926	rbbA; ribosome-dependent ATPase	Translation proteins	Genetic information processing
alt76_00132	ABC-2 type transport system permease protein	NA	NA	K01992	ABC-2.P; ABC-2 type transport system permease protein	Transporters [BR:ko02000]	Membrane transport
alt76_00133	alkylation response protein AidB-like acyl-CoA dehydrogenase	NA	NA	NA	NA	NA	NA
alt76_00134	LysR family transcriptional regulator	NA	NA	NA	NA	NA	NA
alt76_00135	glyoxylase-like metal-dependent hydrolase (beta-lactamase superfamily II)	NA	NA	NA	NA	NA	NA
alt76_00136	AhpD family alkylhydroperoxidase	NA	NA	NA	NA	NA	NA
alt76_00137	hypothetical protein	NA	NA	K06918	K06918; uncharacterized protein	Function unknown	Poorly characterized
alt76_00138	putative membrane protein	NA	NA	K08990	ycjF; putative membrane protein	General function prediction only	Poorly characterized
alt76_00139	uncharacterized membrane protein YjjP (DUF1212 family)	NA	NA	NA	NA	NA	NA
alt76_00140	YHYH protein	NA	NA	NA	NA	NA	NA
alt76_00141	tyrosine lyase ThiH	NA	NA	K03150	thiH; 2-iminoacetate synthase	Thiamine metabolism [PATH:ko00730]	Metabolism of cofactors and vitamins
alt76_00142	thiazole synthase	NA	NA	K03149	thiG; thiazole synthase	Thiamine metabolism [PATH:ko00730]	Metabolism of cofactors and vitamins
alt76_00143	sulfur carrier protein	NA	NA	NA	NA	NA	NA
alt76_00144	sulfur carrier protein ThiS adenylyltransferase	NA	NA	K21029	moeB; molybdopterin-synthase adenylyltransferase	Sulfur relay system [PATH:ko04122]	Folding, sorting and degradation
alt76_00145	thiamine-phosphate diphosphorylase	NA	NA	K00788	thiE; thiamine-phosphate pyrophosphorylase	Thiamine metabolism [PATH:ko00730]	Metabolism of cofactors and vitamins
alt76_00146	hydroxymethylpyrimidine synthase	NA	NA	K03147	thiC; phosphomethylpyrimidine synthase	Thiamine metabolism [PATH:ko00730]	Metabolism of cofactors and vitamins
alt76_00148	iron complex outermembrane receptor protein	NA	NA	NA	NA	NA	NA
alt76_00149	methylenetetrahydromethanopterin reductase	NA	NA	K00320	mer; 5,10-methylenetetrahydromethanopterin reductase	Methane metabolism [PATH:ko00680]	Energy metabolism
alt76_00150	reduced coenzyme F420:NADP oxidoreductase	NA	NA	K06988	fno; 8-hydroxy-5-deazaflavin:NADPH oxidoreductase	Energy metabolism	Metabolism
alt76_00151	coenzyme F420-0 gamma-glutamyl ligase	NA	NA	K12234	cofE, fbiB; coenzyme F420-0:L-glutamate ligase / coenzyme F420-1:gamma-L-glutamate ligase	Methane metabolism [PATH:ko00680]	Energy metabolism
alt76_00152	2-phospho-L-lactate guanylyltransferase	NA	NA	K14941	cofC; 2-phospho-L-lactate guanylyltransferase	Methane metabolism [PATH:ko00680]	Energy metabolism
alt76_00153	LPPG:FO 2-phospho-L-lactate transferase	NA	NA	K11212	cofD; LPPG:FO 2-phospho-L-lactate transferase	Methane metabolism [PATH:ko00680]	Energy metabolism
alt76_00154	FO synthase subunit 2	NA	NA	K11781	cofH; FO synthase subunit 2	Methane metabolism [PATH:ko00680]	Energy metabolism
alt76_00155	FO synthase subunit 1	NA	NA	K11779	fbiC; FO synthase	Methane metabolism [PATH:ko00680]	Energy metabolism
alt76_00156	TetR family transcriptional regulator	NA	NA	K09017	rutR; TetR/AcrR family transcriptional regulator	Transcription factors [BR:ko03000]	Transcription
alt76_00157	LysR family transcriptional regulator	NA	NA	K21699	bauR; LysR family transcriptional regulator, transcriptional activator for bauABCD operon	Transcription factors [BR:ko03000]	Transcription
alt76_00158	beta-alanine--pyruvate transaminase	NA	NA	K00822	E2.6.1.18; beta-alanine--pyruvate transaminase	beta-Alanine metabolism [PATH:ko00410]	Metabolism of other amino acids
alt76_00159	methylmalonate-semialdehyde dehydrogenase [acylating]	NA	NA	K00140	mmsA, iolA, ALDH6A1; malonate-semialdehyde dehydrogenase (acetylating) / methylmalonate-semialdehyde dehydrogenase	Valine, leucine and isoleucine degradation [PATH:ko00280]	Amino acid metabolism
alt76_00160	N-carbamoyl-L-amino-acid hydrolase	NA	NA	K06016	pydC; beta-ureidopropionase / N-carbamoyl-L-amino-acid hydrolase	Pyrimidine metabolism [PATH:ko00240]	Nucleotide metabolism
alt76_00161	NCS1 family nucleobase:cation symporter-1	NA	NA	K03457	TC.NCS1; nucleobase:cation symporter-1, NCS1 family	Transport	Cellular processes and signaling
alt76_00162	dihydropyrimidinase	NA	NA	K01464	DPYS, dht, hydA; dihydropyrimidinase	Pantothenate and CoA biosynthesis [PATH:ko00770]	Metabolism of cofactors and vitamins
alt76_00163	HemY protein	NA	NA	K02498	hemY; HemY protein	Metabolism of cofactors and vitamins	Metabolism
alt76_00164	uroporphyrin-3 C-methyltransferase	NA	NA	K02496	hemX; uroporphyrin-III C-methyltransferase	Porphyrin and chlorophyll metabolism [PATH:ko00860]	Metabolism of cofactors and vitamins
alt76_00165	uroporphyrinogen-III synthase	NA	NA	NA	NA	NA	NA
alt76_00166	hydroxymethylbilane synthase	NA	NA	K01749	hemC, HMBS; hydroxymethylbilane synthase	Porphyrin and chlorophyll metabolism [PATH:ko00860]	Metabolism of cofactors and vitamins
alt76_00167	diguanylate cyclase (GGDEF)-like protein	NA	NA	K02488	pleD; two-component system, cell cycle response regulator	Two-component system [PATH:ko02020]	Signal transduction
alt76_00168	phospholipase/carboxylesterase	NA	NA	K06999	K06999; phospholipase/carboxylesterase	Others	Metabolism
alt76_00169	guanylate kinase	NA	NA	K00942	E2.7.4.8, gmk; guanylate kinase	Purine metabolism [PATH:ko00230]	Nucleotide metabolism
alt76_00170	DNA-directed RNA polymerase subunit omega	NA	NA	K03060	rpoZ; DNA-directed RNA polymerase subunit omega	Purine metabolism [PATH:ko00230]	Nucleotide metabolism
alt76_00171	metal dependent phosphohydrolase	NA	NA	K01139	spoT; GTP diphosphokinase / guanosine-3',5'-bis(diphosphate) 3'-diphosphatase	Ribosome biogenesis [BR:ko03009]	Translation
alt76_00172	reactive intermediate/imine deaminase	NA	NA	K09022	ridA, tdcF, RIDA; 2-iminobutanoate/2-iminopropanoate deaminase	Amino acid metabolism	Metabolism
alt76_00173	tRNA (guanosine-2'-O-)-methyltransferase	NA	NA	K00556	trmH; tRNA (guanosine-2'-O-)-methyltransferase	Transfer RNA biogenesis [BR:ko03016]	Translation
alt76_00174	ATP-dependent DNA helicase RecG	NA	NA	K03655	recG; ATP-dependent DNA helicase RecG	Homologous recombination [PATH:ko03440]	Replication and repair
alt76_00175	16S rRNA (guanine1516-N2)-methyltransferase	NA	NA	K15984	rsmJ; 16S rRNA (guanine1516-N2)-methyltransferase	Ribosome biogenesis [BR:ko03009]	Translation
alt76_00176	peroxiredoxin	NA	NA	K11187	PRDX5; peroxiredoxin 5, atypical 2-Cys peroxiredoxin	Peroxisome [PATH:ko04146]	Transport and catabolism
alt76_00177	hypothetical protein	NA	NA	NA	NA	NA	NA
alt76_00178	iron(III) transport system substrate-binding protein	NA	NA	K02012	afuA, fbpA; iron(III) transport system substrate-binding protein	Transporters [BR:ko02000]	Membrane transport
alt76_00179	iron(III) transport system permease protein	NA	NA	K02011	afuB, fbpB; iron(III) transport system permease protein	Transporters [BR:ko02000]	Membrane transport
alt76_00180	iron(III) transport system ATP-binding protein	NA	NA	K02010	afuC, fbpC; iron(III) transport system ATP-binding protein	ABC transporters [PATH:ko02010]	Membrane transport
alt76_00181	diguanylate cyclase (GGDEF)-like protein	NA	NA	NA	NA	NA	NA
alt76_00182	DUF2892 family protein	NA	NA	NA	NA	NA	NA
alt76_00183	hypothetical protein	NA	NA	NA	NA	NA	NA
alt76_00184	small conductance mechanosensitive channel	NA	NA	NA	NA	NA	NA
alt76_00185	hypothetical protein	NA	NA	NA	NA	NA	NA
alt76_00186	hypothetical protein	NA	NA	NA	NA	NA	NA
alt76_00187	outer membrane receptor protein involved in Fe transport	NA	NA	NA	NA	NA	NA
alt76_00188	hemoglobin	NA	NA	NA	NA	NA	NA
alt76_00189	DUF3034 family protein	NA	NA	NA	NA	NA	NA
alt76_00190	diguanylate cyclase (GGDEF)-like protein	NA	NA	NA	NA	NA	NA
alt76_00191	methyltransferase family protein	NA	NA	NA	NA	NA	NA
alt76_00192	LysR family transcriptional regulator (chromosome initiation inhibitor)	NA	NA	K05596	iciA; LysR family transcriptional regulator, chromosome initiation inhibitor	Chromosome and associated proteins [BR:ko03036]	Replication and repair
alt76_00193	L-lysine exporter family protein LysE/ArgO	NA	NA	K06895	lysE, argO; L-lysine exporter family protein LysE/ArgO	Transporters [BR:ko02000]	Membrane transport
alt76_00194	quaternary ammonium compound-resistance protein SugE	NA	NA	K11741	sugE; quaternary ammonium compound-resistance protein SugE	Transporters [BR:ko02000]	Membrane transport
alt76_00195	uncharacterized protein DUF1499	NA	NA	NA	NA	NA	NA
alt76_00196	DnaJ-like protein	NA	NA	NA	NA	NA	NA
alt76_00197	membrane fusion protein (multidrug efflux system)	NA	NA	K03585	acrA, mexA, adeI, smeD, mtrC, cmeA; membrane fusion protein, multidrug efflux system	Cationic antimicrobial peptide (CAMP) resistance [PATH:ko01503]	Drug resistance
alt76_00198	multidrug efflux pump	NA	NA	K18138	acrB, mexB, adeJ, smeE, mtrD, cmeB; multidrug efflux pump	Cationic antimicrobial peptide (CAMP) resistance [PATH:ko01503]	Drug resistance
alt76_00199	predicted alpha/beta hydrolase family esterase	NA	NA	NA	NA	NA	NA
alt76_00200	acyl-CoA hydrolase	NA	NA	NA	NA	NA	NA
alt76_00201	acetoin utilization deacetylase AcuC-like enzyme	NA	NA	NA	NA	NA	NA
alt76_00202	hypothetical protein	NA	NA	NA	NA	NA	NA
alt76_00203	methyl-accepting chemotaxis protein	NA	NA	NA	NA	NA	NA
alt76_00204	zinc transporter	NA	NA	K16074	zntB; zinc transporter	Transporters [BR:ko02000]	Membrane transport
alt76_00205	uncharacterized protein DUF3300	NA	NA	NA	NA	NA	NA
alt76_00206	GTP cyclohydrolase II	NA	NA	K01497	ribA, RIB1; GTP cyclohydrolase II	Quorum sensing [PATH:ko02024]	Cellular community - prokaryotes
alt76_00207	PAS domain S-box-containing protein/diguanylate cyclase (GGDEF)-like protein	NA	NA	NA	NA	NA	NA
alt76_00208	uncharacterized protein DUF3630	NA	NA	NA	NA	NA	NA
alt76_00209	hypothetical protein	NA	NA	K08997	ydiU; uncharacterized protein	Function unknown	Poorly characterized
alt76_00210	glutathione S-transferase	NA	NA	K00799	GST, gst; glutathione S-transferase	Drug metabolism - cytochrome P450 [PATH:ko00982]	Xenobiotics biodegradation and metabolism
alt76_00211	ATP-dependent DNA helicase RecQ	NA	NA	K03654	recQ; ATP-dependent DNA helicase RecQ	RNA degradation [PATH:ko03018]	Folding, sorting and degradation
alt76_00212	uncharacterized protein (TIGR00369 family)	NA	NA	NA	NA	NA	NA
alt76_00213	magnesium transporter	NA	NA	NA	NA	NA	NA
alt76_00214	chloramphenicol-sensitive protein RarD	NA	NA	K05786	rarD; chloramphenicol-sensitive protein RarD	Transporters [BR:ko02000]	Membrane transport
alt76_00215	response regulator receiver modulated diguanylate cyclase	NA	NA	NA	NA	NA	NA
alt76_00216	ATP-dependent DNA helicase UvrD	NA	NA	K03657	uvrD, pcrA; DNA helicase II / ATP-dependent DNA helicase PcrA	Mismatch repair [PATH:ko03430]	Replication and repair
alt76_00217	serine O-acetyltransferase	NA	NA	K00640	cysE; serine O-acetyltransferase	Biofilm formation - Vibrio cholerae [PATH:ko05111]	Cellular community - prokaryotes
alt76_00218	putative hydrolase of the HAD superfamily	NA	NA	K20862	yigB; FMN hydrolase / 5-amino-6-(5-phospho-D-ribitylamino)uracil phosphatase	Riboflavin metabolism [PATH:ko00740]	Metabolism of cofactors and vitamins
alt76_00219	integrase/recombinase XerC	NA	NA	K03733	xerC; integrase/recombinase XerC	Chromosome and associated proteins [BR:ko03036]	Replication and repair
alt76_00220	hypothetical protein	NA	NA	K09921	K09921; uncharacterized protein	Function unknown	Poorly characterized
alt76_00221	diaminopimelate epimerase	NA	NA	K01778	dapF; diaminopimelate epimerase	Lysine biosynthesis [PATH:ko00300]	Amino acid metabolism
alt76_00222	diaminopimelate decarboxylase	NA	NA	K01586	lysA; diaminopimelate decarboxylase	Lysine biosynthesis [PATH:ko00300]	Amino acid metabolism
alt76_00223	putative lipoprotein	NA	NA	NA	NA	NA	NA
alt76_00224	uncharacterized protein (TIGR00661 family)	NA	NA	NA	NA	NA	NA
alt76_00225	undecaprenyl-diphosphatase	NA	NA	NA	NA	NA	NA
alt76_00226	regulator of ribonuclease activity A	NA	NA	K02553	rraA, menG; regulator of ribonuclease activity A	Messenger RNA Biogenesis [BR:ko03019]	Translation
alt76_00227	S1/P1 nuclease	NA	NA	NA	NA	NA	NA
alt76_00228	4-hydroxy-3-polyprenylbenzoate decarboxylase	NA	NA	K03186	ubiX, bsdB, PAD1; flavin prenyltransferase	Aminobenzoate degradation [PATH:ko00627]	Xenobiotics biodegradation and metabolism
alt76_00229	UDP-N-acetylmuramate: L-alanyl-gamma-D-glutamyl-meso-diaminopimelate ligase	NA	NA	K02558	mpl; UDP-N-acetylmuramate: L-alanyl-gamma-D-glutamyl-meso-diaminopimelate ligase	Membrane and intracellular structural molecules	Cellular processes and signaling
alt76_00230	D-fructose 1,6-bisphosphatase	NA	NA	K03841	FBP, fbp; fructose-1,6-bisphosphatase I	Pentose phosphate pathway [PATH:ko00030]	Carbohydrate metabolism
alt76_00231	inorganic pyrophosphatase	NA	NA	K01507	ppa; inorganic pyrophosphatase	Oxidative phosphorylation [PATH:ko00190]	Energy metabolism
alt76_00232	hypothetical protein	NA	NA	NA	NA	NA	NA
alt76_00233	2-oxoglutarate-Fe(II)-dependent oxygenase superfamily protein	NA	NA	NA	NA	NA	NA
alt76_00234	acyl-CoA thioester hydrolase	NA	NA	NA	NA	NA	NA
alt76_00235	hypothetical chaperone protein	NA	NA	K04046	yegD; hypothetical chaperone protein	Chaperones and folding catalysts [BR:ko03110]	Folding, sorting and degradation
alt76_00236	excinuclease ABC subunit A	NA	NA	K03701	uvrA; excinuclease ABC subunit A	Nucleotide excision repair [PATH:ko03420]	Replication and repair
alt76_00237	predicted MFS family arabinose efflux permease	NA	NA	NA	NA	NA	NA
alt76_00238	HAD superfamily hydrolase (TIGR01509 family)/beta-phosphoglucomutase family hydrolase	NA	NA	NA	NA	NA	NA
alt76_00239	hypothetical protein	NA	NA	NA	NA	NA	NA
alt76_00240	LacI family transcriptional regulator	NA	NA	K02529	lacI, galR; LacI family transcriptional regulator	Transcription factors [BR:ko03000]	Transcription
alt76_00241	aldose 1-epimerase	NA	NA	K01785	galM, GALM; aldose 1-epimerase	Galactose metabolism [PATH:ko00052]	Carbohydrate metabolism
alt76_00242	UDPglucose--hexose-1-phosphate uridylyltransferase	NA	NA	K00965	galT, GALT; UDPglucose--hexose-1-phosphate uridylyltransferase	Galactose metabolism [PATH:ko00052]	Carbohydrate metabolism
alt76_00243	galactokinase	NA	NA	K00849	galK; galactokinase	Amino sugar and nucleotide sugar metabolism [PATH:ko00520]	Carbohydrate metabolism
alt76_00244	SSS family solute:Na+ symporter	NA	NA	K14391	SLC5A11, SMIT2, SGLT6; solute carrier family 5 (sodium/myo-inositol cotransporter), member 11	Transporters [BR:ko02000]	Membrane transport
alt76_00245	single-strand binding protein	NA	NA	K03111	ssb; single-strand DNA-binding protein	Homologous recombination [PATH:ko03440]	Replication and repair
alt76_00246	transglutaminase superfamily protein	NA	NA	NA	NA	NA	NA
alt76_00247	hypothetical protein	NA	NA	NA	NA	NA	NA
alt76_00248	4-hydroxy-tetrahydrodipicolinate synthase	NA	NA	K01714	dapA; 4-hydroxy-tetrahydrodipicolinate synthase	Lysine biosynthesis [PATH:ko00300]	Amino acid metabolism
alt76_00249	MFS transporter	NA	NA	NA	NA	NA	NA
alt76_00250	platelet-activating factor acetylhydrolase isoform II	NA	NA	NA	NA	NA	NA
alt76_00251	hypothetical protein	NA	NA	NA	NA	NA	NA
alt76_00252	tetratricopeptide repeat protein	NA	NA	NA	NA	NA	NA
alt76_00253	alpha-galactosidase	GH36	9.8e-219	K07407	E3.2.1.22B, galA, rafA; alpha-galactosidase	Galactose metabolism [PATH:ko00052]	Carbohydrate metabolism
alt76_00254	SapC protein	NA	NA	NA	NA	NA	NA
alt76_00255	tryptophan halogenase	NA	NA	NA	NA	NA	NA
alt76_00256	SSS family solute:Na+ symporter	NA	NA	NA	NA	NA	NA
alt76_00257	TonB-dependent receptor	NA	NA	NA	NA	NA	NA
alt76_00258	glycerol kinase	NA	NA	K00864	glpK, GK; glycerol kinase	PPAR signaling pathway [PATH:ko03320]	Endocrine system
alt76_00259	DeoR family transcriptional regulator	NA	NA	K02444	glpR; DeoR family transcriptional regulator, glycerol-3-phosphate regulon repressor	Transcription factors [BR:ko03000]	Transcription
alt76_00260	homodimeric glycerol 3-phosphate dehydrogenase (quinone)	NA	NA	K00111	glpA, glpD; glycerol-3-phosphate dehydrogenase	Glycerophospholipid metabolism [PATH:ko00564]	Lipid metabolism
alt76_00261	broad specificity phosphatase PhoE	NA	NA	NA	NA	NA	NA
alt76_00262	MSHA biogenesis protein MshI	NA	NA	NA	NA	NA	NA
alt76_00263	hypothetical protein	NA	NA	NA	NA	NA	NA
alt76_00264	MSHA biogenesis protein MshJ	NA	NA	NA	NA	NA	NA
alt76_00265	MSHA biogenesis protein MshK	NA	NA	NA	NA	NA	NA
alt76_00266	MSHA biogenesis protein MshL	NA	NA	NA	NA	NA	NA
alt76_00267	MSHA biogenesis protein MshM	NA	NA	NA	NA	NA	NA
alt76_00268	MSHA biogenesis protein MshN	NA	NA	NA	NA	NA	NA
alt76_00269	MSHA biogenesis protein MshE	NA	NA	K02652	pilB; type IV pilus assembly protein PilB	Secretion system [BR:ko02044]	Membrane transport
alt76_00270	MSHA biogenesis protein MshG	NA	NA	K02455	gspF; general secretion pathway protein F	Biofilm formation - Vibrio cholerae [PATH:ko05111]	Cellular community - prokaryotes
alt76_00271	hypothetical protein	NA	NA	NA	NA	NA	NA
alt76_00272	MSHA pilin protein MshB	NA	NA	NA	NA	NA	NA
alt76_00273	MSHA pilin protein MshA	NA	NA	NA	NA	NA	NA
alt76_00274	MSHA pilin protein MshC	NA	NA	NA	NA	NA	NA
alt76_00275	MSHA pilin protein MshD	NA	NA	NA	NA	NA	NA
alt76_00276	MSHA biogenesis protein MshO	NA	NA	NA	NA	NA	NA
alt76_00277	MSHA biogenesis protein MshP	NA	NA	NA	NA	NA	NA
alt76_00278	rod shape-determining protein MreB	NA	NA	K03569	mreB; rod shape-determining protein MreB and related proteins	Prokaryotic Defense System [BR:ko02048]	Transport and catabolism
alt76_00279	rod shape-determining protein MreC	NA	NA	K03570	mreC; rod shape-determining protein MreC	Chromosome and associated proteins [BR:ko03036]	Replication and repair
alt76_00280	rod shape-determining protein MreD	NA	NA	K03571	mreD; rod shape-determining protein MreD	Chromosome and associated proteins [BR:ko03036]	Replication and repair
alt76_00281	septum formation protein	NA	NA	K06287	maf; septum formation protein	Cell growth	Cellular processes and signaling
alt76_00282	RNAse G	NA	NA	K08301	rng, cafA; ribonuclease G	Ribosome biogenesis [BR:ko03009]	Translation
alt76_00283	uncharacterized protein (TIGR02099 family)	NA	NA	NA	NA	NA	NA
alt76_00284	predicted amidohydrolase	NA	NA	K11206	NA	NA	NA	MER0249885	microcin-processing peptidase 2	5.8e-310
alt76_00285	microcin-processing peptidase 2	NA	NA	K03568	tldD; TldD protein	Peptidases [BR:ko01002]	Enzyme families	MER0249865	microcin-processing peptidase 1	1.8e-290
alt76_00286	hypothetical protein	NA	NA	NA	NA	NA	NA
alt76_00287	ribosome-associated protein	NA	NA	K09889	yjgA; ribosome-associated protein	Ribosome biogenesis [BR:ko03009]	Translation
alt76_00288	microcin-processing peptidase 1	NA	NA	K03592	pmbA; PmbA protein	Peptidases [BR:ko01002]	Enzyme families	MER0241665	family A32 unassigned peptidases	0.0071
alt76_00289	AraC-like DNA-binding protein	NA	NA	NA	NA	NA	NA
alt76_00290	beta-galactosidase	GH2	5.7e-227	K01190	lacZ; beta-galactosidase	Galactose metabolism [PATH:ko00052]	Carbohydrate metabolism
alt76_00291	winged helix family two component transcriptional regulator	NA	NA	K07773	arcA; two-component system, OmpR family, aerobic respiration control protein ArcA	Biofilm formation - Escherichia coli [PATH:ko02026]	Cellular community - prokaryotes
alt76_00292	histidine kinase	NA	NA	NA	NA	NA	NA
alt76_00293	glycogen synthase (ADP-glucose)	GT5	7.1e-165	K00703	glgA; starch synthase	Starch and sucrose metabolism [PATH:ko00500]	Carbohydrate metabolism
alt76_00294	16S rRNA m(2)G 1207 methyltransferase	NA	NA	K00564	rsmC; 16S rRNA (guanine1207-N2)-methyltransferase	Ribosome biogenesis [BR:ko03009]	Translation
alt76_00295	tRNA (guanine-N(7)-)-methyltransferase	NA	NA	K03439	trmB, METTL1; tRNA (guanine-N7-)-methyltransferase	Transfer RNA biogenesis [BR:ko03016]	Translation
alt76_00296	pimeloyl-ACP methyl ester carboxylesterase	NA	NA	NA	NA	NA	NA
alt76_00297	A/G-specific DNA-adenine glycosylase	NA	NA	K03575	mutY; A/G-specific adenine glycosylase	DNA repair and recombination proteins [BR:ko03400]	Replication and repair
alt76_00298	Fe-S cluster biosynthesis and repair protein YggX	NA	NA	NA	NA	NA	NA
alt76_00300	Rieske 2Fe-2S family protein	NA	NA	NA	NA	NA	NA
alt76_00301	ABC-2 family transporter	NA	NA	NA	NA	NA	NA
alt76_00302	ABC-2 type transport system ATP-binding protein	NA	NA	NA	NA	NA	NA
alt76_00303	hypothetical protein	NA	NA	NA	NA	NA	NA
alt76_00304	SagB-type dehydrogenase family enzyme	NA	NA	NA	NA	NA	NA
alt76_00305	thiazole/oxazole-forming peptide maturase SagD family component	NA	NA	K09136	ycaO; ribosomal protein S12 methylthiotransferase accessory factor	Ribosome biogenesis [BR:ko03009]	Translation
alt76_00306	bacteriocin biosynthesis cyclodehydratase domain-containing protein	NA	NA	NA	NA	NA	NA
alt76_00307	hypothetical protein	NA	NA	NA	NA	NA	NA
alt76_00308	hypothetical protein	NA	NA	NA	NA	NA	NA
alt76_00309	NodT family efflux transporter outer membrane factor (OMF) lipoprotein	NA	NA	NA	NA	NA	NA
alt76_00310	RND family efflux transporter MFP subunit	NA	NA	NA	NA	NA	NA
alt76_00311	multidrug efflux pump subunit AcrB	NA	NA	NA	NA	NA	NA
alt76_00312	DNA-binding response OmpR family regulator	NA	NA	NA	NA	NA	NA
alt76_00313	signal transduction histidine kinase	NA	NA	NA	NA	NA	NA
alt76_00314	hypothetical protein	NA	NA	NA	NA	NA	NA
alt76_00315	aspartyl protease	NA	NA	NA	NA	NA	NA	MER0249137	subfamily M48A unassigned peptidases	2.6e-134
alt76_00316	hypothetical protein	NA	NA	NA	NA	NA	NA
alt76_00317	DUF2986 family protein	NA	NA	NA	NA	NA	NA
alt76_00318	tellurite resistance protein TehA-like permease	NA	NA	K11041	eta; exfoliative toxin A/B	Staphylococcus aureus infection [PATH:ko05150]	Infectious diseases
alt76_00319	hemoglobin/transferrin/lactoferrin receptor protein	NA	NA	K16087	TC.FEV.OM3, tbpA, hemR, lbpA, hpuB, bhuR, hugA, hmbR; hemoglobin/transferrin/lactoferrin receptor protein	Transporters [BR:ko02000]	Membrane transport
alt76_00320	uncharacterized iron-regulated membrane protein	NA	NA	NA	NA	NA	NA
alt76_00321	two-component system sensor histidine kinase PfeS	NA	NA	K19609	pfeS, pirS; two-component system, OmpR family, sensor histidine kinase PfeS	Protein kinases [BR:ko01001]	Enzyme families
alt76_00322	two-component system response regulator PfeR	NA	NA	K19610	pfeR, pirR; two-component system, OmpR family, response regulator PfeR	Two-component system [BR:ko02022]	Signal transduction
alt76_00323	heat shock protein HslJ	NA	NA	NA	NA	NA	NA
alt76_00324	methyl-accepting chemotaxis sensory transducer	NA	NA	K03406	mcp; methyl-accepting chemotaxis protein	Bacterial motility proteins [BR:ko02035]	Cell motility
alt76_00325	response regulator receiver protein	NA	NA	K03413	cheY; two-component system, chemotaxis family, chemotaxis protein CheY	Bacterial chemotaxis [PATH:ko02030]	Cell motility
alt76_00326	two-component system chemotaxis sensor kinase CheA	NA	NA	K03407	cheA; two-component system, chemotaxis family, sensor kinase CheA	Two-component system [BR:ko02022]	Signal transduction
alt76_00327	CheW protein	NA	NA	K03408	cheW; purine-binding chemotaxis protein CheW	Bacterial motility proteins [BR:ko02035]	Cell motility
alt76_00328	methyl-accepting chemotaxis sensory transducer with Pas/Pac sensor	NA	NA	K03406	mcp; methyl-accepting chemotaxis protein	Bacterial motility proteins [BR:ko02035]	Cell motility
alt76_00329	CheR-type MCP methyltransferase	NA	NA	K00575	cheR; chemotaxis protein methyltransferase CheR	Two-component system [PATH:ko02020]	Signal transduction
alt76_00330	CheD activator of MCP protein methylation	NA	NA	K03411	cheD; chemotaxis protein CheD	Bacterial chemotaxis [PATH:ko02030]	Cell motility
alt76_00331	two-component system chemotaxis response regulator CheB	NA	NA	K03412	cheB; two-component system, chemotaxis family, protein-glutamate methylesterase/glutaminase	Two-component system [PATH:ko02020]	Signal transduction
alt76_00332	hypothetical protein	NA	NA	NA	NA	NA	NA
alt76_00333	2-haloacid dehalogenase	NA	NA	K01560	E3.8.1.2; 2-haloacid dehalogenase	Chlorocyclohexane and chlorobenzene degradation [PATH:ko00361]	Xenobiotics biodegradation and metabolism
alt76_00334	heat shock protein	NA	NA	K03799	htpX; heat shock protein HtpX	Peptidases [BR:ko01002]	Enzyme families	MER0248458	peptidyl-dipeptidase Dcp	0.0e+00
alt76_00335	outer membrane receptor protein involved in Fe transport	NA	NA	NA	NA	NA	NA
alt76_00336	LacI family transcriptional regulator	NA	NA	NA	NA	NA	NA
alt76_00337	fucose permease	NA	NA	NA	NA	NA	NA
alt76_00338	alpha,alpha-trehalase	GH37	1.3e-157	K01194	TREH, treA, treF; alpha,alpha-trehalase	Glycosylphosphatidylinositol (GPI)-anchored proteins [BR:ko00537]	Glycan biosynthesis and metabolism
alt76_00339	uncharacterized membrane protein	NA	NA	NA	NA	NA	NA
alt76_00340	HAD superfamily hydrolase (TIGR01509 family)/HAD superfamily hydrolase (TIGR01549 family)	NA	NA	NA	NA	NA	NA
alt76_00341	hypothetical protein	NA	NA	NA	NA	NA	NA
alt76_00342	phospho-acceptor domain-containing protein	NA	NA	NA	NA	NA	NA
alt76_00343	hypothetical protein	NA	NA	NA	NA	NA	NA
alt76_00344	hypothetical protein	NA	NA	NA	NA	NA	NA
alt76_00345	F5/8 type C domain-containing protein	PL18	7.4e-69	NA	NA	NA	NA
alt76_00346	uncharacterized protein DUF3392	NA	NA	NA	NA	NA	NA
alt76_00347	secreted protein	NA	NA	NA	NA	NA	NA
alt76_00348	LacI family transcriptional regulator	NA	NA	K05499	cytR; LacI family transcriptional regulator, repressor for deo operon, udp, cdd, tsx, nupC, and nupG	Transcription factors [BR:ko03000]	Transcription
alt76_00349	predicted dehydrogenase	NA	NA	NA	NA	NA	NA
alt76_00350	sugar phosphate isomerase/epimerase	NA	NA	NA	NA	NA	NA
alt76_00351	nucleoside transporter	NA	NA	NA	NA	NA	NA
alt76_00352	hydroxypyruvate isomerase	NA	NA	K01816	hyi, gip; hydroxypyruvate isomerase	Glyoxylate and dicarboxylate metabolism [PATH:ko00630]	Carbohydrate metabolism
alt76_00353	choline dehydrogenase-like flavoprotein	NA	NA	K06151	E1.1.99.3A; gluconate 2-dehydrogenase alpha chain	Pentose phosphate pathway [PATH:ko00030]	Carbohydrate metabolism
alt76_00354	gluconate 2-dehydrogenase subunit 3-like protein	NA	NA	NA	NA	NA	NA
alt76_00355	uncharacterized protein DUF1080	NA	NA	NA	NA	NA	NA
alt76_00356	DNA-binding transcriptional LysR family regulator	NA	NA	K21698	aaeR; LysR family transcriptional regulator, transcriptional activator for aaeXAB operon	Transcription factors [BR:ko03000]	Transcription
alt76_00357	putative intracellular protease/amidase	NA	NA	K22211	GLX3, HSP31; D-lactate dehydratase	Pyruvate metabolism [PATH:ko00620]	Carbohydrate metabolism
alt76_00358	hypothetical protein	NA	NA	NA	NA	NA	NA
alt76_00359	uncharacterized protein DUF3500	NA	NA	NA	NA	NA	NA
alt76_00360	alcohol dehydrogenase class IV	NA	NA	K13954	yiaY; alcohol dehydrogenase	Fatty acid degradation [PATH:ko00071]	Lipid metabolism
alt76_00361	2,3-bisphosphoglycerate-dependent phosphoglycerate mutase	NA	NA	K01834	PGAM, gpmA; 2,3-bisphosphoglycerate-dependent phosphoglycerate mutase	Membrane trafficking [BR:ko04131]	Folding, sorting and degradation
alt76_00362	aconitase	NA	NA	K01681	ACO, acnA; aconitate hydratase	Carbon fixation pathways in prokaryotes [PATH:ko00720]	Energy metabolism
alt76_00363	type II secretory ATPase GspE/PulE/Tfp pilus assembly ATPase PilB-like protein	NA	NA	K02652	pilB; type IV pilus assembly protein PilB	Secretion system [BR:ko02044]	Membrane transport
alt76_00364	SSU ribosomal protein S10P	NA	NA	K02946	RP-S10, MRPS10, rpsJ; small subunit ribosomal protein S10	Ribosome [PATH:ko03010]	Translation
alt76_00365	LSU ribosomal protein L3P	NA	NA	K02906	RP-L3, MRPL3, rplC; large subunit ribosomal protein L3	Ribosome [PATH:ko03010]	Translation
alt76_00366	LSU ribosomal protein L4P	NA	NA	K02926	RP-L4, MRPL4, rplD; large subunit ribosomal protein L4	Ribosome [PATH:ko03010]	Translation
alt76_00367	LSU ribosomal protein L23P	NA	NA	K02892	RP-L23, MRPL23, rplW; large subunit ribosomal protein L23	Ribosome [PATH:ko03010]	Translation
alt76_00368	LSU ribosomal protein L2P	NA	NA	K02886	RP-L2, MRPL2, rplB; large subunit ribosomal protein L2	Ribosome [BR:ko03011]	Translation
alt76_00369	SSU ribosomal protein S19P	NA	NA	K02965	RP-S19, rpsS; small subunit ribosomal protein S19	Ribosome [BR:ko03011]	Translation
alt76_00370	LSU ribosomal protein L22P	NA	NA	K02890	RP-L22, MRPL22, rplV; large subunit ribosomal protein L22	Ribosome [BR:ko03011]	Translation
alt76_00371	SSU ribosomal protein S3P	NA	NA	K02982	RP-S3, rpsC; small subunit ribosomal protein S3	Ribosome [BR:ko03011]	Translation
alt76_00372	LSU ribosomal protein L16P	NA	NA	K02878	RP-L16, MRPL16, rplP; large subunit ribosomal protein L16	Ribosome [BR:ko03011]	Translation
alt76_00373	LSU ribosomal protein L29P	NA	NA	K02904	RP-L29, rpmC; large subunit ribosomal protein L29	Ribosome [BR:ko03011]	Translation
alt76_00374	SSU ribosomal protein S17P	NA	NA	K02961	RP-S17, MRPS17, rpsQ; small subunit ribosomal protein S17	Ribosome [PATH:ko03010]	Translation
alt76_00375	glycosyltransferase involved in cell wall biosynthesis	GT4	4.6e-31	K13668	pimB; phosphatidyl-myo-inositol dimannoside synthase	Glycosyltransferases [BR:ko01003]	Glycan biosynthesis and metabolism
alt76_00376	heptosyltransferase-1	GT9	2.8e-48	K02841	waaC, rfaC; heptosyltransferase I	Lipopolysaccharide biosynthesis [PATH:ko00540]	Glycan biosynthesis and metabolism
alt76_00377	3-deoxy-D-manno-octulosonic-acid transferase	GT30	8.6e-62	K02527	kdtA, waaA; 3-deoxy-D-manno-octulosonic-acid transferase	Lipopolysaccharide biosynthesis [PATH:ko00540]	Glycan biosynthesis and metabolism
alt76_00378	sodium/proton antiporter (CPA1 family)	NA	NA	NA	NA	NA	NA
alt76_00379	uncharacterized protein YjiK	NA	NA	NA	NA	NA	NA
alt76_00380	hypothetical protein	NA	NA	NA	NA	NA	NA
alt76_00381	methyl-accepting chemotaxis sensory transducer with Cache sensor	NA	NA	K03406	mcp; methyl-accepting chemotaxis protein	Bacterial motility proteins [BR:ko02035]	Cell motility
alt76_00382	peptidyl-dipeptidase Dcp	NA	NA	K01284	dcp; peptidyl-dipeptidase Dcp	Peptidases [BR:ko01002]	Enzyme families	MER0247625	gamma-glutamyltransferase 1 (bacterial-type)	0.0e+00
alt76_00383	inner membrane protein	NA	NA	NA	NA	NA	NA
alt76_00384	formyltetrahydrofolate deformylase	NA	NA	K01433	purU; formyltetrahydrofolate deformylase	Glyoxylate and dicarboxylate metabolism [PATH:ko00630]	Carbohydrate metabolism
alt76_00385	2'-5' RNA ligase	NA	NA	NA	NA	NA	NA
alt76_00386	ATP-dependent helicase HrpB	NA	NA	K03579	hrpB; ATP-dependent helicase HrpB	Replication, recombination and repair proteins	Genetic information processing
alt76_00387	membrane-bound lytic murein transglycosylase B	GH103	6.8e-118	NA	NA	NA	NA
alt76_00388	hypothetical protein	NA	NA	NA	NA	NA	NA
alt76_00389	penicillin-binding protein 1B	GT51	3.3e-58	K05365	mrcB; penicillin-binding protein 1B	Peptidoglycan biosynthesis [PATH:ko00550]	Glycan biosynthesis and metabolism
alt76_00390	hypothetical protein	NA	NA	NA	NA	NA	NA
alt76_00391	hypothetical protein	NA	NA	NA	NA	NA	NA
alt76_00392	hypothetical protein	NA	NA	K09781	K09781; uncharacterized protein	Function unknown	Poorly characterized
alt76_00393	AraC family transcriptional regulator	NA	NA	NA	NA	NA	NA
alt76_00394	EamA-like transporter family protein	NA	NA	NA	NA	NA	NA
alt76_00395	hypothetical protein	NA	NA	NA	NA	NA	NA
alt76_00396	nitrogen regulatory protein P-II family	NA	NA	K04752	glnK; nitrogen regulatory protein P-II 2	Transcription related proteins	Genetic information processing
alt76_00397	ammonium transporter	NA	NA	K03320	amt, AMT, MEP; ammonium transporter, Amt family	Transporters [BR:ko02000]	Membrane transport
alt76_00398	gamma-glutamyltransferase 2	NA	NA	K00681	ggt; gamma-glutamyltranspeptidase / glutathione hydrolase	Glutathione metabolism [PATH:ko00480]	Metabolism of other amino acids
alt76_00399	putative iron-dependent peroxidase	NA	NA	K07223	K07223; putative iron-dependent peroxidase	Inorganic ion transport and metabolism	Cellular processes and signaling
alt76_00400	adenylate cyclase	NA	NA	K01768	E4.6.1.1; adenylate cyclase	Meiosis - yeast [PATH:ko04113]	Cell growth and death
alt76_00401	glutamate-1-semialdehyde 2,1-aminomutase	NA	NA	K01845	hemL; glutamate-1-semialdehyde 2,1-aminomutase	Porphyrin and chlorophyll metabolism [PATH:ko00860]	Metabolism of cofactors and vitamins
alt76_00402	aspartate carbamoyltransferase	NA	NA	K00609	pyrB, PYR2; aspartate carbamoyltransferase catalytic subunit	Alanine, aspartate and glutamate metabolism [PATH:ko00250]	Amino acid metabolism
alt76_00403	TetR family transcriptional regulator	NA	NA	K18301	mexL; TetR/AcrR family transcriptional regulator, mexJK operon transcriptional repressor	Antimicrobial resistance genes [BR:ko01504]	Drug resistance
alt76_00404	RND family efflux transporter MFP subunit	NA	NA	NA	NA	NA	NA
alt76_00405	multidrug efflux pump subunit AcrB	NA	NA	NA	NA	NA	NA
alt76_00406	DUF2982 family protein	NA	NA	NA	NA	NA	NA
alt76_00407	two-component system sensor histidine kinase BarA	NA	NA	K07678	barA, gacS, varS; two-component system, NarL family, sensor histidine kinase BarA	Biofilm formation - Vibrio cholerae [PATH:ko05111]	Cellular community - prokaryotes
alt76_00408	DNA topoisomerase IV subunit A	NA	NA	K02621	parC; topoisomerase IV subunit A	Chromosome and associated proteins [BR:ko03036]	Replication and repair
alt76_00409	heme-NO-binding protein	NA	NA	NA	NA	NA	NA
alt76_00410	diguanylate cyclase (GGDEF)-like protein	NA	NA	NA	NA	NA	NA
alt76_00411	uncharacterized protein DUF1338	NA	NA	NA	NA	NA	NA
alt76_00412	succinylglutamic semialdehyde dehydrogenase	NA	NA	K06447	astD; succinylglutamic semialdehyde dehydrogenase	Arginine and proline metabolism [PATH:ko00330]	Amino acid metabolism
alt76_00413	arginine succinyltransferase	NA	NA	K00673	astA; arginine N-succinyltransferase	Arginine and proline metabolism [PATH:ko00330]	Amino acid metabolism
alt76_00414	acetylornithine aminotransferase	NA	NA	K00821	argD; acetylornithine/N-succinyldiaminopimelate aminotransferase	Lysine biosynthesis [PATH:ko00300]	Amino acid metabolism
alt76_00415	HDOD domain-containing protein	NA	NA	NA	NA	NA	NA
alt76_00416	anthranilate synthase component 2/para-aminobenzoate synthetase component 2	NA	NA	K01658	trpG; anthranilate synthase component II	Quorum sensing [PATH:ko02024]	Cellular community - prokaryotes
alt76_00417	tryptophanyl-tRNA synthetase	NA	NA	K01867	WARS, trpS; tryptophanyl-tRNA synthetase	Aminoacyl-tRNA biosynthesis [PATH:ko00970]	Translation
alt76_00418	ribulose-5-phosphate 3-epimerase	NA	NA	K01783	rpe, RPE; ribulose-phosphate 3-epimerase	Pentose and glucuronate interconversions [PATH:ko00040]	Carbohydrate metabolism
alt76_00419	uncharacterized protein (TIGR02001 family)	NA	NA	NA	NA	NA	NA
alt76_00420	hypothetical protein	NA	NA	NA	NA	NA	NA
alt76_00421	DUF2970 family protein	NA	NA	NA	NA	NA	NA
alt76_00422	DNA adenine methylase Dam	NA	NA	K06223	dam; DNA adenine methylase	Mismatch repair [PATH:ko03430]	Replication and repair
alt76_00423	DamX protein	NA	NA	NA	NA	NA	NA
alt76_00424	3-dehydroquinate synthase	NA	NA	K01735	aroB; 3-dehydroquinate synthase	Phenylalanine, tyrosine and tryptophan biosynthesis [PATH:ko00400]	Amino acid metabolism
alt76_00425	shikimate kinase	NA	NA	K00891	E2.7.1.71, aroK, aroL; shikimate kinase	Phenylalanine, tyrosine and tryptophan biosynthesis [PATH:ko00400]	Amino acid metabolism
alt76_00426	type IV pilus assembly protein PilQ	NA	NA	K02666	pilQ; type IV pilus assembly protein PilQ	Bacterial motility proteins [BR:ko02035]	Cell motility
alt76_00427	type IV pilus assembly protein PilP	NA	NA	K02665	pilP; type IV pilus assembly protein PilP	Secretion system [BR:ko02044]	Membrane transport
alt76_00428	type IV pilus assembly protein PilO	NA	NA	K02664	pilO; type IV pilus assembly protein PilO	Secretion system [BR:ko02044]	Membrane transport
alt76_00429	type IV pilus assembly protein PilN	NA	NA	K02663	pilN; type IV pilus assembly protein PilN	Bacterial motility proteins [BR:ko02035]	Cell motility
alt76_00430	type IV pilus assembly protein PilM	NA	NA	K02662	pilM; type IV pilus assembly protein PilM	Secretion system [BR:ko02044]	Membrane transport
alt76_00431	penicillin-binding protein 1A	GT51	2.7e-65	K05366	mrcA; penicillin-binding protein 1A	Peptidoglycan biosynthesis and degradation proteins [BR:ko01011]	Glycan biosynthesis and metabolism
alt76_00432	NAD-dependent malic enzyme	NA	NA	K00027	ME2, sfcA, maeA; malate dehydrogenase (oxaloacetate-decarboxylating)	Pyruvate metabolism [PATH:ko00620]	Carbohydrate metabolism
alt76_00433	hypothetical protein	NA	NA	NA	NA	NA	NA
alt76_00434	GST-like protein	NA	NA	K11209	yghU, yfcG; GSH-dependent disulfide-bond oxidoreductase	Amino acid metabolism	Metabolism
alt76_00435	TetR family transcriptional regulator	NA	NA	NA	NA	NA	NA
alt76_00436	hypothetical protein	NA	NA	NA	NA	NA	NA
alt76_00437	uncharacterized protein DUF2855	NA	NA	NA	NA	NA	NA
alt76_00438	predicted alpha/beta hydrolase	NA	NA	NA	NA	NA	NA
alt76_00439	diguanylate cyclase/phosphodiesterase	NA	NA	NA	NA	NA	NA
alt76_00440	N-acetylglutamate synthase	NA	NA	K14682	argAB; amino-acid N-acetyltransferase	Arginine biosynthesis [PATH:ko00220]	Amino acid metabolism
alt76_00441	argininosuccinate lyase	NA	NA	K01755	argH, ASL; argininosuccinate lyase	Arginine biosynthesis [PATH:ko00220]	Amino acid metabolism
alt76_00442	argininosuccinate synthase	NA	NA	K01940	argG, ASS1; argininosuccinate synthase	Alanine, aspartate and glutamate metabolism [PATH:ko00250]	Amino acid metabolism
alt76_00443	ornithine carbamoyltransferase	NA	NA	K00611	OTC, argF, argI; ornithine carbamoyltransferase	Arginine biosynthesis [PATH:ko00220]	Amino acid metabolism
alt76_00444	N-acetylglutamate kinase	NA	NA	K00930	argB; acetylglutamate kinase	Arginine biosynthesis [PATH:ko00220]	Amino acid metabolism
alt76_00445	N-acetyl-gamma-glutamyl-phosphate reductase	NA	NA	K00145	argC; N-acetyl-gamma-glutamyl-phosphate reductase	Arginine biosynthesis [PATH:ko00220]	Amino acid metabolism
alt76_00446	methylglyoxal synthase	NA	NA	K01734	mgsA; methylglyoxal synthase	Propanoate metabolism [PATH:ko00640]	Carbohydrate metabolism
alt76_00447	hypothetical protein	NA	NA	NA	NA	NA	NA
alt76_00448	flagellar L-ring protein precursor FlgH	NA	NA	NA	NA	NA	NA
alt76_00449	flagellar assembly T-like protein	NA	NA	NA	NA	NA	NA
alt76_00450	protein CpxP	NA	NA	NA	NA	NA	NA
alt76_00451	two-component system response regulator CpxR	NA	NA	K07662	cpxR; two-component system, OmpR family, response regulator CpxR	Two-component system [PATH:ko02020]	Signal transduction
alt76_00452	two-component system sensor histidine kinase CpxA	NA	NA	K07640	cpxA; two-component system, OmpR family, sensor histidine kinase CpxA	Protein kinases [BR:ko01001]	Enzyme families
alt76_00453	lysophospholipase	NA	NA	K01048	pldB; lysophospholipase	Glycerophospholipid metabolism [PATH:ko00564]	Lipid metabolism
alt76_00454	tRNA (cytidine/uridine-2'-O-)-methyltransferase	NA	NA	K03216	trmL, cspR; tRNA (cytidine/uridine-2'-O-)-methyltransferase	Transfer RNA biogenesis [BR:ko03016]	Translation
alt76_00455	glycerol 3-phosphate dehydrogenase (NAD(P)+)	NA	NA	K00057	gpsA; glycerol-3-phosphate dehydrogenase (NAD(P)+)	Glycerophospholipid metabolism [PATH:ko00564]	Lipid metabolism
alt76_00456	protein translocase subunit secB	NA	NA	K03071	secB; preprotein translocase subunit SecB	Secretion system [BR:ko02044]	Membrane transport
alt76_00457	glutaredoxin 3	NA	NA	K03676	grxC, GLRX, GLRX2; glutaredoxin 3	Chaperones and folding catalysts [BR:ko03110]	Folding, sorting and degradation
alt76_00458	rhodanese-related sulfurtransferase	NA	NA	NA	NA	NA	NA
alt76_00459	septal ring factor EnvC (AmiA/AmiB activator)	NA	NA	K22719	NA	NA	NA
alt76_00460	hypothetical protein	NA	NA	NA	NA	NA	NA
alt76_00461	hypothetical protein	NA	NA	K09798	K09798; uncharacterized protein	Function unknown	Poorly characterized
alt76_00462	MerC mercury resistance protein	NA	NA	NA	NA	NA	NA
alt76_00463	glycerophosphoryl diester phosphodiesterase	NA	NA	K01126	E3.1.4.46, glpQ, ugpQ; glycerophosphoryl diester phosphodiesterase	Glycerophospholipid metabolism [PATH:ko00564]	Lipid metabolism
alt76_00464	threonine/homoserine efflux transporter RhtA	NA	NA	NA	NA	NA	NA
alt76_00465	phosphatidylserine decarboxylase	NA	NA	K01613	psd, PISD; phosphatidylserine decarboxylase	Glycerophospholipid metabolism [PATH:ko00564]	Lipid metabolism
alt76_00466	ribosome biogenesis GTPase	NA	NA	K06949	rsgA, engC; ribosome biogenesis GTPase / thiamine phosphate phosphatase	Ribosome biogenesis [BR:ko03009]	Translation
alt76_00467	hypothetical protein	NA	NA	NA	NA	NA	NA
alt76_00468	oligoribonuclease	NA	NA	K13288	orn, REX2, REXO2; oligoribonuclease	Ribosome biogenesis [BR:ko03009]	Translation
alt76_00471	TonB-dependent receptor-like protein	NA	NA	NA	NA	NA	NA
alt76_00472	acyl-coenzyme A thioesterase PaaI-like protein	NA	NA	NA	NA	NA	NA
alt76_00473	hypothetical protein	NA	NA	K09897	K09897; uncharacterized protein	Function unknown	Poorly characterized
alt76_00474	acetolactate synthase large subunit	NA	NA	K01652	E2.2.1.6L, ilvB, ilvG, ilvI; acetolactate synthase I/II/III large subunit	C5-Branched dibasic acid metabolism [PATH:ko00660]	Carbohydrate metabolism
alt76_00475	acetolactate synthase small subunit	NA	NA	K01653	E2.2.1.6S, ilvH, ilvN; acetolactate synthase I/III small subunit	Valine, leucine and isoleucine biosynthesis [PATH:ko00290]	Amino acid metabolism
alt76_00476	hypothetical protein	NA	NA	NA	NA	NA	NA
alt76_00477	sec-independent protein translocase protein TatA	NA	NA	NA	NA	NA	NA
alt76_00478	Sec-independent protein translocase TatB	NA	NA	K03117	tatB; sec-independent protein translocase protein TatB	Secretion system [BR:ko02044]	Membrane transport
alt76_00479	Sec-independent protein translocase TatC	NA	NA	K03118	tatC; sec-independent protein translocase protein TatC	Protein export [PATH:ko03060]	Folding, sorting and degradation
alt76_00480	hypothetical protein	NA	NA	NA	NA	NA	NA
alt76_00481	Sec-independent protein translocase TatD	NA	NA	K03424	tatD; TatD DNase family protein	Replication, recombination and repair proteins	Genetic information processing
alt76_00482	diguanylate cyclase (GGDEF)-like protein	NA	NA	NA	NA	NA	NA
alt76_00483	porphobilinogen synthase	NA	NA	K01698	hemB, ALAD; porphobilinogen synthase	Porphyrin and chlorophyll metabolism [PATH:ko00860]	Metabolism of cofactors and vitamins
alt76_00484	Ppx/GppA phosphatase	NA	NA	K01524	ppx-gppA; exopolyphosphatase / guanosine-5'-triphosphate,3'-diphosphate pyrophosphatase	Purine metabolism [PATH:ko00230]	Nucleotide metabolism
alt76_00485	ATP-dependent RNA helicase RhlB	NA	NA	K03732	rhlB; ATP-dependent RNA helicase RhlB	RNA degradation [PATH:ko03018]	Folding, sorting and degradation
alt76_00486	thioredoxin	NA	NA	K03671	trxA; thioredoxin 1	Chaperones and folding catalysts [BR:ko03110]	Folding, sorting and degradation
alt76_00487	transcription termination factor Rho	NA	NA	K03628	rho; transcription termination factor Rho	Transcription machinery [BR:ko03021]	Transcription
alt76_00488	amidohydrolase	NA	NA	K01436	K01436; amidohydrolase	Peptidases [BR:ko01002]	Enzyme families
alt76_00489	signal transduction histidine kinase	NA	NA	NA	NA	NA	NA
alt76_00490	sodium/proton antiporter (NhaA family)	NA	NA	K03313	nhaA; Na+:H+ antiporter, NhaA family	Transporters [BR:ko02000]	Membrane transport
alt76_00491	5-(carboxyamino)imidazole ribonucleotide mutase	NA	NA	K01588	purE; 5-(carboxyamino)imidazole ribonucleotide mutase	Purine metabolism [PATH:ko00230]	Nucleotide metabolism
alt76_00492	5-(carboxyamino)imidazole ribonucleotide synthase	NA	NA	K01589	purK; 5-(carboxyamino)imidazole ribonucleotide synthase	Purine metabolism [PATH:ko00230]	Nucleotide metabolism
alt76_00494	hypothetical protein	NA	NA	K09796	pccA; periplasmic copper chaperone A	Chaperones and folding catalysts [BR:ko03110]	Folding, sorting and degradation
alt76_00495	starvation-inducible DNA-binding protein	NA	NA	K04047	dps; starvation-inducible DNA-binding protein	Chromosome and associated proteins [BR:ko03036]	Replication and repair
alt76_00496	glucose/arabinose dehydrogenase	NA	NA	K21430	yliI; aldose sugar dehydrogenase	Carbohydrate metabolism	Metabolism
alt76_00497	hypothetical protein	NA	NA	NA	NA	NA	NA
alt76_00498	thioredoxin	NA	NA	K05838	ybbN; putative thioredoxin	Chaperones and folding catalysts [BR:ko03110]	Folding, sorting and degradation
alt76_00499	hypothetical protein	NA	NA	NA	NA	NA	NA
alt76_00500	hypothetical protein	NA	NA	NA	NA	NA	NA
alt76_00501	adenylosuccinate synthetase	NA	NA	K01939	purA, ADSS; adenylosuccinate synthase	Purine metabolism [PATH:ko00230]	Nucleotide metabolism
alt76_00502	aldehyde dehydrogenase (NAD+)	NA	NA	K00128	ALDH; aldehyde dehydrogenase (NAD+)	Glycerolipid metabolism [PATH:ko00561]	Lipid metabolism
alt76_00503	hypothetical protein	NA	NA	K06991	K06991; uncharacterized protein	Function unknown	Poorly characterized
alt76_00504	gamma-glutamyltranspeptidase/glutathione hydrolase	NA	NA	K00681	ggt; gamma-glutamyltranspeptidase / glutathione hydrolase	Glutathione metabolism [PATH:ko00480]	Metabolism of other amino acids	MER0247526	Xaa-Pro dipeptidase (bacteria-type)	2.7e-192
alt76_00505	transporter (NhaC family)	NA	NA	NA	NA	NA	NA
alt76_00506	beta-N-acetylhexosaminidase	GH3	7.2e-54	K01207	nagZ; beta-N-acetylhexosaminidase	Amino sugar and nucleotide sugar metabolism [PATH:ko00520]	Carbohydrate metabolism
alt76_00507	mechanosensitive ion channel-like protein	NA	NA	NA	NA	NA	NA
alt76_00508	D-lactate dehydrogenase	NA	NA	K18930	dld; D-lactate dehydrogenase	Carbohydrate metabolism	Metabolism
alt76_00509	uncharacterized protein YbbC (DUF1343 family)	NA	NA	NA	NA	NA	NA
alt76_00510	N-acetylmuramic acid 6-phosphate etherase	NA	NA	K07106	murQ; N-acetylmuramic acid 6-phosphate etherase	Amino sugar and nucleotide sugar metabolism [PATH:ko00520]	Carbohydrate metabolism
alt76_00511	alanine racemase	NA	NA	K01775	alr; alanine racemase	D-Alanine metabolism [PATH:ko00473]	Metabolism of other amino acids
alt76_00512	uncharacterized 5xTM membrane YitT family protein	NA	NA	NA	NA	NA	NA
alt76_00513	hypothetical protein	NA	NA	NA	NA	NA	NA
alt76_00514	glyoxalase/bleomycin resistance protein/dioxygenase superfamily protein	NA	NA	NA	NA	NA	NA
alt76_00515	hypothetical protein	NA	NA	NA	NA	NA	NA
alt76_00516	amino acid ABC transporter substrate-binding protein (PAAT family)	NA	NA	K02030	ABC.PA.S; polar amino acid transport system substrate-binding protein	Transporters [BR:ko02000]	Membrane transport
alt76_00517	alginate export protein	NA	NA	NA	NA	NA	NA
alt76_00518	Mn2+/Fe2+ NRAMP family transporter	NA	NA	NA	NA	NA	NA
alt76_00519	hypothetical protein	NA	NA	NA	NA	NA	NA
alt76_00520	acetyltransferase (GNAT) family protein	NA	NA	NA	NA	NA	NA
alt76_00521	RNA recognition motif-containing protein	NA	NA	K12838	PUF60; poly(U)-binding-splicing factor PUF60	Spliceosome [PATH:ko03040]	Transcription
alt76_00522	NAD(P)H-dependent FMN reductase	NA	NA	NA	NA	NA	NA
alt76_00523	2-oxoglutarate-Fe(II)-dependent oxygenase superfamily protein	NA	NA	K13646	PLOD3; lysyl hydroxylase/galactosyltransferase/glucosyltransferase	Glycosyltransferases [BR:ko01003]	Glycan biosynthesis and metabolism
alt76_00524	hypothetical protein	NA	NA	NA	NA	NA	NA
alt76_00525	RimJ/RimL family protein N-acetyltransferase	NA	NA	K03790	rimJ; ribosomal-protein-alanine N-acetyltransferase	Ribosome biogenesis [BR:ko03009]	Translation
alt76_00526	hypothetical protein	NA	NA	NA	NA	NA	NA
alt76_00527	hypothetical protein	NA	NA	NA	NA	NA	NA
alt76_00528	uncharacterized membrane protein YeiB	NA	NA	NA	NA	NA	NA
alt76_00529	hypothetical protein	NA	NA	NA	NA	NA	NA
alt76_00530	hypothetical protein	NA	NA	NA	NA	NA	NA
alt76_00531	uncharacterized protein DUF4265	NA	NA	NA	NA	NA	NA
alt76_00532	mRNA interferase RelE/StbE	NA	NA	NA	NA	NA	NA
alt76_00533	hypothetical protein	NA	NA	NA	NA	NA	NA
alt76_00534	hypothetical protein	NA	NA	NA	NA	NA	NA
alt76_00535	transposase	NA	NA	NA	NA	NA	NA
alt76_00536	hypothetical protein	NA	NA	NA	NA	NA	NA
alt76_00537	hypothetical protein	NA	NA	NA	NA	NA	NA
alt76_00538	hypothetical protein	NA	NA	NA	NA	NA	NA
alt76_00539	hypothetical protein	NA	NA	NA	NA	NA	NA
alt76_00540	secretory protein of YscJ/FliF family	NA	NA	NA	NA	NA	NA
alt76_00541	hypothetical protein	NA	NA	NA	NA	NA	NA
alt76_00542	hypothetical protein	NA	NA	NA	NA	NA	NA
alt76_00543	hypothetical protein	NA	NA	NA	NA	NA	NA
alt76_00544	hypothetical protein	NA	NA	NA	NA	NA	NA
alt76_00545	hypothetical protein	NA	NA	NA	NA	NA	NA
alt76_00546	hypothetical protein	NA	NA	NA	NA	NA	NA
alt76_00547	hypothetical protein	NA	NA	NA	NA	NA	NA
alt76_00548	hypothetical protein	NA	NA	NA	NA	NA	NA
alt76_00549	hypothetical protein	NA	NA	NA	NA	NA	NA
alt76_00550	hypothetical protein	NA	NA	NA	NA	NA	NA
alt76_00551	hypothetical protein	NA	NA	NA	NA	NA	NA
alt76_00552	hypothetical protein	NA	NA	NA	NA	NA	NA
alt76_00553	hypothetical protein	NA	NA	NA	NA	NA	NA
alt76_00554	hypothetical protein	NA	NA	NA	NA	NA	NA
alt76_00555	hypothetical protein	NA	NA	NA	NA	NA	NA
alt76_00556	hypothetical protein	NA	NA	NA	NA	NA	NA
alt76_00557	integron integrase	NA	NA	NA	NA	NA	NA
alt76_00558	3-ketoacyl-CoA thiolase	NA	NA	K00632	fadA, fadI; acetyl-CoA acyltransferase	Valine, leucine and isoleucine degradation [PATH:ko00280]	Amino acid metabolism
alt76_00559	short chain enoyl-CoA hydratase /3-hydroxyacyl-CoA dehydrogenase	NA	NA	K01825	fadB; 3-hydroxyacyl-CoA dehydrogenase / enoyl-CoA hydratase / 3-hydroxybutyryl-CoA epimerase / enoyl-CoA isomerase	Propanoate metabolism [PATH:ko00640]	Carbohydrate metabolism
alt76_00560	soluble lytic murein transglycosylase	GH23	7.2e-26	K08309	slt; soluble lytic murein transglycosylase	Peptidoglycan biosynthesis and degradation proteins [BR:ko01011]	Glycan biosynthesis and metabolism
alt76_00561	Xaa-Pro dipeptidase	NA	NA	K01271	pepQ; Xaa-Pro dipeptidase	Peptidases [BR:ko01002]	Enzyme families	MER0076418	family M49 unassigned peptidases	5.9e-90
alt76_00562	ZIP family zinc transporter	NA	NA	NA	NA	NA	NA
alt76_00563	octaprenyl-diphosphate synthase	NA	NA	K02523	ispB; octaprenyl-diphosphate synthase	Prenyltransferases [BR:ko01006]	Metabolism of terpenoids and polyketides
alt76_00564	LSU ribosomal protein L21P	NA	NA	K02888	RP-L21, MRPL21, rplU; large subunit ribosomal protein L21	Ribosome [BR:ko03011]	Translation
alt76_00565	LSU ribosomal protein L27P	NA	NA	K02899	RP-L27, MRPL27, rpmA; large subunit ribosomal protein L27	Ribosome [BR:ko03011]	Translation
alt76_00566	GTP-binding protein	NA	NA	K03979	obgE, cgtA; GTPase	Ribosome biogenesis [BR:ko03009]	Translation
alt76_00567	hypothetical protein	NA	NA	NA	NA	NA	NA
alt76_00568	dihydrofolate reductase	NA	NA	K00287	DHFR, folA; dihydrofolate reductase	Antifolate resistance [PATH:ko01523]	Drug resistance
alt76_00569	RNA polymerase RpoS-like sigma 38 subunit	NA	NA	K03087	SIG2, rpoS; RNA polymerase nonessential primary-like sigma factor	Biofilm formation - Vibrio cholerae [PATH:ko05111]	Cellular community - prokaryotes
alt76_00570	lipoprotein NlpD	NA	NA	K06194	nlpD; lipoprotein NlpD	Membrane and intracellular structural molecules	Cellular processes and signaling
alt76_00571	membrane protein YqaA with SNARE-associated domain	NA	NA	NA	NA	NA	NA
alt76_00572	protein-L-isoaspartate(D-aspartate) O-methyltransferase	NA	NA	K00573	E2.1.1.77, pcm; protein-L-isoaspartate(D-aspartate) O-methyltransferase	Protein folding and associated processing	Genetic information processing
alt76_00573	5'-nucleotidase /3'-nucleotidase /exopolyphosphatase	NA	NA	K03787	surE; 5'-nucleotidase	Nicotinate and nicotinamide metabolism [PATH:ko00760]	Metabolism of cofactors and vitamins
alt76_00574	tRNA pseudouridine13 synthase	NA	NA	K06176	truD, PUS7; tRNA pseudouridine13 synthase	Transfer RNA biogenesis [BR:ko03016]	Translation
alt76_00575	2-C-methyl-D-erythritol 2,4-cyclodiphosphate synthase	NA	NA	K01770	ispF; 2-C-methyl-D-erythritol 2,4-cyclodiphosphate synthase	Terpenoid backbone biosynthesis [PATH:ko00900]	Metabolism of terpenoids and polyketides
alt76_00576	2-C-methyl-D-erythritol 4-phosphate cytidylyltransferase	NA	NA	K00991	ispD; 2-C-methyl-D-erythritol 4-phosphate cytidylyltransferase	Terpenoid backbone biosynthesis [PATH:ko00900]	Metabolism of terpenoids and polyketides
alt76_00577	cell division protein FtsB	NA	NA	K05589	ftsB; cell division protein FtsB	Chromosome and associated proteins [BR:ko03036]	Replication and repair
alt76_00578	uncharacterized protein (TIGR03545 family)	NA	NA	NA	NA	NA	NA
alt76_00579	methyl-accepting chemotaxis sensory transducer with Cache sensor	NA	NA	K03406	mcp; methyl-accepting chemotaxis protein	Bacterial motility proteins [BR:ko02035]	Cell motility
alt76_00580	L-proline dehydrogenase /delta-1-pyrroline-5-carboxylate dehydrogenase	NA	NA	K13821	putA; RHH-type transcriptional regulator, proline utilization regulon repressor / proline dehydrogenase / delta 1-pyrroline-5-carboxylate dehydrogenase	Arginine and proline metabolism [PATH:ko00330]	Amino acid metabolism
alt76_00581	NodT family efflux transporter outer membrane factor (OMF) lipoprotein	NA	NA	NA	NA	NA	NA
alt76_00582	RND family efflux transporter MFP subunit	NA	NA	NA	NA	NA	NA
alt76_00583	multidrug efflux pump subunit AcrB	NA	NA	NA	NA	NA	NA
alt76_00584	DNA-binding response OmpR family regulator	NA	NA	K07771	basR; two-component system, OmpR family, response regulator BasR	Cationic antimicrobial peptide (CAMP) resistance [PATH:ko01503]	Drug resistance
alt76_00585	signal transduction histidine kinase	NA	NA	NA	NA	NA	NA
alt76_00586	SH3 domain protein	NA	NA	K07184	ygiM; SH3 domain protein	Signal transduction mechanisms	Cellular processes and signaling
alt76_00587	triphosphatase	NA	NA	K18446	ygiF; triphosphatase	Energy metabolism	Metabolism
alt76_00588	hypothetical protein	NA	NA	NA	NA	NA	NA
alt76_00589	DNA mismatch repair protein MutH	NA	NA	K03573	mutH; DNA mismatch repair protein MutH	Mismatch repair [PATH:ko03430]	Replication and repair
alt76_00590	putative (di)nucleoside polyphosphate hydrolase	NA	NA	K08311	nudH; putative (di)nucleoside polyphosphate hydrolase	Messenger RNA Biogenesis [BR:ko03019]	Translation
alt76_00591	PTSINtr with GAF domain PtsP	NA	NA	K08484	PTS-EI.PTSP, ptsP; phosphotransferase system, enzyme I, PtsP	Phosphotransferase system (PTS) [PATH:ko02060]	Membrane transport
alt76_00592	uncharacterized membrane protein YfcA	NA	NA	K07090	K07090; uncharacterized protein	Function unknown	Poorly characterized
alt76_00593	phosphatidylglycerol:prolipoprotein diacylglycerol transferase	NA	NA	K13292	lgt, umpA; phosphatidylglycerol:prolipoprotein diacylglycerol transferase	Lipid metabolism	Metabolism
alt76_00594	thymidylate synthase	NA	NA	K00560	thyA, TYMS; thymidylate synthase	Pyrimidine metabolism [PATH:ko00240]	Nucleotide metabolism
alt76_00595	chemotaxis protein CheY-P-specific phosphatase CheC	NA	NA	K11692	K11692, dctR; two-component system, CitB family, response regulator DctR	Two-component system [BR:ko02022]	Signal transduction
alt76_00596	diguanylate cyclase (GGDEF)-like protein	NA	NA	K18967	dge1; diguanylate cyclase	Transporters [BR:ko02000]	Membrane transport
alt76_00597	signal transduction histidine kinase	NA	NA	NA	NA	NA	NA
alt76_00598	PAT family beta-lactamase induction signal transducer AmpG	NA	NA	K08218	ampG; MFS transporter, PAT family, beta-lactamase induction signal transducer AmpG	beta-Lactam resistance [PATH:ko01501]	Drug resistance
alt76_00599	hypothetical protein	NA	NA	NA	NA	NA	NA
alt76_00600	uncharacterized protein DUF3530	NA	NA	NA	NA	NA	NA
alt76_00601	ribosomal large subunit pseudouridine synthase A	NA	NA	K06177	rluA; tRNA pseudouridine32 synthase / 23S rRNA pseudouridine746 synthase	Ribosome biogenesis [BR:ko03009]	Translation
alt76_00602	ATP-dependent helicase HepA	NA	NA	K03580	hepA; ATP-dependent helicase HepA	Transcription machinery [BR:ko03021]	Transcription
alt76_00603	PhoH-like ATPase	NA	NA	K07175	phoH2; PhoH-like ATPase	Signal transduction mechanisms	Cellular processes and signaling
alt76_00604	hypothetical protein	NA	NA	NA	NA	NA	NA
alt76_00605	uroporphyrinogen-III C-methyltransferase /precorrin-2 dehydrogenase	NA	NA	K02302	cysG; uroporphyrin-III C-methyltransferase / precorrin-2 dehydrogenase / sirohydrochlorin ferrochelatase	Porphyrin and chlorophyll metabolism [PATH:ko00860]	Metabolism of cofactors and vitamins
alt76_00606	ATP-dependent RNA helicase CsdA	NA	NA	K05592	deaD, cshA; ATP-dependent RNA helicase DeaD	Ribosome biogenesis [BR:ko03009]	Translation
alt76_00607	putative PEP-CTERM system TPR-repeat lipoprotein	NA	NA	NA	NA	NA	NA
alt76_00608	voltage-gated sodium channel	NA	NA	K04856	CACNA1I; voltage-dependent calcium channel T type alpha-1I	Circadian entrainment [PATH:ko04713]	Environmental adaptation
alt76_00609	hypothetical protein	NA	NA	NA	NA	NA	NA
alt76_00610	outer membrane protein	NA	NA	K12340	tolC; outer membrane protein	Cationic antimicrobial peptide (CAMP) resistance [PATH:ko01503]	Drug resistance
alt76_00611	ADP-ribose pyrophosphatase	NA	NA	K01515	nudF; ADP-ribose pyrophosphatase	Purine metabolism [PATH:ko00230]	Nucleotide metabolism
alt76_00612	hypothetical protein	NA	NA	K09920	K09920; uncharacterized protein	Function unknown	Poorly characterized
alt76_00613	Icc protein	NA	NA	K03651	cpdA; 3',5'-cyclic-AMP phosphodiesterase	Purine metabolism [PATH:ko00230]	Nucleotide metabolism
alt76_00614	hypothetical protein	NA	NA	K07000	K07000; uncharacterized protein	Function unknown	Poorly characterized
alt76_00615	DNA topoisomerase IV subunit B	NA	NA	K02622	parE; topoisomerase IV subunit B	Prokaryotic Defense System [BR:ko02048]	Transport and catabolism
alt76_00616	two-component system CheB/CheR fusion protein	NA	NA	K00575	cheR; chemotaxis protein methyltransferase CheR	Two-component system [PATH:ko02020]	Signal transduction
alt76_00617	PAS domain-containing protein	NA	NA	NA	NA	NA	NA
alt76_00618	HAD superfamily hydrolase (TIGR01509 family)	NA	NA	NA	NA	NA	NA
alt76_00619	hypothetical protein	NA	NA	NA	NA	NA	NA
alt76_00620	hypothetical protein	NA	NA	NA	NA	NA	NA
alt76_00621	hypothetical protein	NA	NA	NA	NA	NA	NA
alt76_00622	L-lysine 2,3-aminomutase	NA	NA	K19810	epmB; L-lysine 2,3-aminomutase	Translation factors [BR:ko03012]	Translation
alt76_00623	translation elongation factor P (EF-P)	NA	NA	K02356	efp; elongation factor P	Translation factors [BR:ko03012]	Translation
alt76_00624	lysyl-tRNA synthetase class 2	NA	NA	K04568	epmA, poxA; elongation factor P--(R)-beta-lysine ligase	Translation factors [BR:ko03012]	Translation
alt76_00625	iron complex outermembrane receptor protein	NA	NA	K02014	TC.FEV.OM; iron complex outermembrane recepter protein	Transporters [BR:ko02000]	Membrane transport
alt76_00626	hypothetical protein	NA	NA	NA	NA	NA	NA
alt76_00627	RimJ/RimL family protein N-acetyltransferase	NA	NA	NA	NA	NA	NA
alt76_00628	peptidyl-prolyl cis-trans isomerase A (cyclophilin A)	NA	NA	K03770	ppiD; peptidyl-prolyl cis-trans isomerase D	Chaperones and folding catalysts [BR:ko03110]	Folding, sorting and degradation
alt76_00629	23S rRNA m(2)G-1835 methyltransferase	NA	NA	K11391	rlmG; 23S rRNA (guanine1835-N2)-methyltransferase	Ribosome biogenesis [BR:ko03009]	Translation
alt76_00630	DNA-N1-methyladenine dioxygenase	NA	NA	NA	NA	NA	NA
alt76_00631	BolA protein family transcriptional regulator	NA	NA	K05527	bolA; BolA family transcriptional regulator, general stress-responsive regulator	Transcription factors [BR:ko03000]	Transcription
alt76_00632	undecaprenyl-diphosphatase	NA	NA	K19302	bcrC; undecaprenyl-diphosphatase	Peptidoglycan biosynthesis [PATH:ko00550]	Glycan biosynthesis and metabolism
alt76_00633	hypothetical protein	NA	NA	K09962	K09962; uncharacterized protein	Function unknown	Poorly characterized
alt76_00634	nitrate/nitrite sensing protein	NA	NA	NA	NA	NA	NA
alt76_00635	nitrate/nitrite sensing protein	NA	NA	NA	NA	NA	NA
alt76_00636	hypothetical protein	NA	NA	NA	NA	NA	NA
alt76_00637	SulP family sulfate permease	NA	NA	K03321	TC.SULP; sulfate permease, SulP family	Transporters [BR:ko02000]	Membrane transport
alt76_00638	assimilatory nitrite reductase (NAD(P)H) large subunit precursor	NA	NA	K00362	nirB; nitrite reductase (NADH) large subunit	Nitrogen metabolism [PATH:ko00910]	Energy metabolism
alt76_00639	nitrite reductase (NADH) small subunit	NA	NA	K00363	nirD; nitrite reductase (NADH) small subunit	Nitrogen metabolism [PATH:ko00910]	Energy metabolism
alt76_00640	assimilatory nitrate reductase catalytic subunit	NA	NA	K00372	nasA; assimilatory nitrate reductase catalytic subunit	Nitrogen metabolism [PATH:ko00910]	Energy metabolism
alt76_00641	uroporphyrin-III C-methyltransferase	NA	NA	K00589	MET1; uroporphyrin-III C-methyltransferase	Porphyrin and chlorophyll metabolism [PATH:ko00860]	Metabolism of cofactors and vitamins
alt76_00642	anthranilate phosphoribosyltransferase	NA	NA	NA	NA	NA	NA
alt76_00643	methyl-accepting chemotaxis sensory transducer with Pas/Pac sensor	NA	NA	K03406	mcp; methyl-accepting chemotaxis protein	Bacterial motility proteins [BR:ko02035]	Cell motility
alt76_00644	nitrate/nitrite transport system substrate-binding protein	NA	NA	K22067	nasS; two-component system, oxyanion-binding sensor	Two-component system [BR:ko02022]	Signal transduction
alt76_00645	nitrate/nitrite transport system permease protein	NA	NA	K15577	nrtB, nasE, cynB; nitrate/nitrite transport system permease protein	ABC transporters [PATH:ko02010]	Membrane transport
alt76_00646	nitrate/nitrite transport system ATP-binding protein	NA	NA	K15578	nrtC, nasD; nitrate/nitrite transport system ATP-binding protein	Nitrogen metabolism [PATH:ko00910]	Energy metabolism
alt76_00647	alginate export protein	NA	NA	NA	NA	NA	NA
alt76_00648	putative hydrolase of HD superfamily	NA	NA	NA	NA	NA	NA
alt76_00649	thiol:disulfide interchange protein DsbA	NA	NA	K03673	dsbA; thiol:disulfide interchange protein DsbA	Chaperones and folding catalysts [BR:ko03110]	Folding, sorting and degradation
alt76_00650	vitamin B12 transporter	NA	NA	K16092	btuB; vitamin B12 transporter	Transporters [BR:ko02000]	Membrane transport
alt76_00652	Ser/Thr protein kinase RdoA (MazF antagonist)	NA	NA	NA	NA	NA	NA
alt76_00653	cytochrome c oxidase accessory protein FixG	NA	NA	NA	NA	NA	NA
alt76_00654	hypothetical protein	NA	NA	NA	NA	NA	NA
alt76_00655	DUF3016 family protein	NA	NA	NA	NA	NA	NA
alt76_00656	alkylation response protein AidB-like acyl-CoA dehydrogenase	NA	NA	NA	NA	NA	NA
alt76_00657	NAD(P)-dependent dehydrogenase (short-subunit alcohol dehydrogenase family)	NA	NA	NA	NA	NA	NA
alt76_00658	predicted TIM-barrel fold metal-dependent hydrolase	NA	NA	NA	NA	NA	NA
alt76_00659	hypothetical protein	NA	NA	NA	NA	NA	NA
alt76_00660	hypothetical protein	NA	NA	NA	NA	NA	NA
alt76_00661	L-alanine-DL-glutamate epimerase-like enolase superfamily enzyme	NA	NA	NA	NA	NA	NA
alt76_00662	ribulose-5-phosphate 4-epimerase/fuculose-1-phosphate aldolase	NA	NA	NA	NA	NA	NA
alt76_00663	NUDIX domain-containing protein	NA	NA	NA	NA	NA	NA
alt76_00664	membrane fusion protein (multidrug efflux system)	NA	NA	K03585	acrA, mexA, adeI, smeD, mtrC, cmeA; membrane fusion protein, multidrug efflux system	Cationic antimicrobial peptide (CAMP) resistance [PATH:ko01503]	Drug resistance
alt76_00665	multidrug efflux pump	NA	NA	K18138	acrB, mexB, adeJ, smeE, mtrD, cmeB; multidrug efflux pump	Cationic antimicrobial peptide (CAMP) resistance [PATH:ko01503]	Drug resistance
alt76_00666	hypothetical protein	NA	NA	NA	NA	NA	NA
alt76_00667	hypothetical protein	NA	NA	NA	NA	NA	NA
alt76_00668	methyl-accepting chemotaxis protein	NA	NA	K03406	mcp; methyl-accepting chemotaxis protein	Bacterial motility proteins [BR:ko02035]	Cell motility
alt76_00669	RNA polymerase RpoD-like sigma 70 subunit	NA	NA	K03086	SIG1, rpoD; RNA polymerase primary sigma factor	Transcription machinery [BR:ko03021]	Transcription
alt76_00670	DNA primase	NA	NA	K02316	dnaG; DNA primase	DNA replication [PATH:ko03030]	Replication and repair
alt76_00671	hypothetical protein	NA	NA	K09117	K09117; uncharacterized protein	Function unknown	Poorly characterized
alt76_00672	SSU ribosomal protein S21P	NA	NA	K02970	RP-S21, MRPS21, rpsU; small subunit ribosomal protein S21	Ribosome [PATH:ko03010]	Translation
alt76_00673	O-sialoglycoprotein endopeptidase	NA	NA	K01409	KAE1, tsaD, QRI7; N6-L-threonylcarbamoyladenine synthase	Transfer RNA biogenesis [BR:ko03016]	Translation
alt76_00674	predicted AlkP superfamily pyrophosphatase or phosphodiesterase	NA	NA	K01513	ENPP1_3, CD203; ectonucleotide pyrophosphatase/phosphodiesterase family member 1/3	Riboflavin metabolism [PATH:ko00740]	Metabolism of cofactors and vitamins
alt76_00675	acyl-phosphate glycerol-3-phosphate acyltransferase	NA	NA	K08591	plsY; glycerol-3-phosphate acyltransferase PlsY	Glycerolipid metabolism [PATH:ko00561]	Lipid metabolism
alt76_00676	dihydroneopterin aldolase	NA	NA	K01633	folB; 7,8-dihydroneopterin aldolase/epimerase/oxygenase	Folate biosynthesis [PATH:ko00790]	Metabolism of cofactors and vitamins
alt76_00677	2-amino-4-hydroxy-6-hydroxymethyldihydropteridine diphosphokinase	NA	NA	K00950	folK; 2-amino-4-hydroxy-6-hydroxymethyldihydropteridine diphosphokinase	Folate biosynthesis [PATH:ko00790]	Metabolism of cofactors and vitamins
alt76_00678	undecaprenyl-diphosphatase	NA	NA	K06153	bacA; undecaprenyl-diphosphatase	Peptidoglycan biosynthesis [PATH:ko00550]	Glycan biosynthesis and metabolism
alt76_00679	histidine triad (HIT) family protein	NA	NA	K02503	HINT1, hinT, hit; histidine triad (HIT) family protein	Exosome [BR:ko04147]	Transport and catabolism
alt76_00680	peptidase M49-like protein	NA	NA	NA	NA	NA	NA	MER0248774	subfamily S1C unassigned peptidases	8.1e-168
alt76_00681	HD-like signal output (HDOD) protein	NA	NA	NA	NA	NA	NA
alt76_00682	benzoate membrane transport protein	NA	NA	K05782	benE; benzoate membrane transport protein	Transporters [BR:ko02000]	Membrane transport
alt76_00683	XRE family transcriptional regulator	NA	NA	NA	NA	NA	NA
alt76_00684	recombination associated protein RdgC	NA	NA	K03554	rdgC; recombination associated protein RdgC	DNA repair and recombination proteins [BR:ko03400]	Replication and repair
alt76_00685	signal transduction histidine kinase	NA	NA	NA	NA	NA	NA
alt76_00686	winged helix family two component transcriptional regulator	NA	NA	K07657	phoB; two-component system, OmpR family, phosphate regulon response regulator PhoB	Two-component system [BR:ko02022]	Signal transduction
alt76_00687	PAS/PAC sensor signal transduction histidine kinase	NA	NA	K07636	phoR; two-component system, OmpR family, phosphate regulon sensor histidine kinase PhoR	Two-component system [PATH:ko02020]	Signal transduction
alt76_00688	phosphate ABC transporter substrate-binding protein (PhoT family)	NA	NA	K02040	pstS; phosphate transport system substrate-binding protein	Two-component system [PATH:ko02020]	Signal transduction
alt76_00689	prolyl 4-hydroxylase	NA	NA	K00472	P4HA; prolyl 4-hydroxylase	Arginine and proline metabolism [PATH:ko00330]	Amino acid metabolism
alt76_00690	hypothetical protein	NA	NA	NA	NA	NA	NA
alt76_00691	TonB-dependent receptor	NA	NA	NA	NA	NA	NA
alt76_00692	uncharacterized protein DUF3450	NA	NA	NA	NA	NA	NA
alt76_00693	outer membrane transport energization protein ExbB	NA	NA	K03561	exbB; biopolymer transport protein ExbB	Transporters [BR:ko02000]	Membrane transport
alt76_00694	outer membrane transport energization protein ExbB	NA	NA	NA	NA	NA	NA
alt76_00695	outer membrane transport energization protein ExbD	NA	NA	NA	NA	NA	NA
alt76_00696	outer membrane transport energization protein TonB	NA	NA	NA	NA	NA	NA
alt76_00697	tetratricopeptide repeat protein	NA	NA	NA	NA	NA	NA
alt76_00698	putative two-component system response regulator	NA	NA	NA	NA	NA	NA
alt76_00699	PAS domain S-box-containing protein	NA	NA	NA	NA	NA	NA
alt76_00700	long-chain acyl-CoA synthetase	NA	NA	K01897	ACSL, fadD; long-chain acyl-CoA synthetase	Lipid biosynthesis proteins [BR:ko01004]	Lipid metabolism
alt76_00701	hypothetical protein	NA	NA	NA	NA	NA	NA
alt76_00702	glucose/arabinose dehydrogenase	NA	NA	NA	NA	NA	NA
alt76_00703	aconitase	NA	NA	NA	NA	NA	NA
alt76_00704	DNA ligase-1	NA	NA	K10747	LIG1; DNA ligase 1	DNA repair and recombination proteins [BR:ko03400]	Replication and repair
alt76_00705	aconitase	NA	NA	K01682	acnB; aconitate hydratase 2 / 2-methylisocitrate dehydratase	Citrate cycle (TCA cycle) [PATH:ko00020]	Carbohydrate metabolism
alt76_00706	hypothetical protein	NA	NA	K09005	K09005; uncharacterized protein	Function unknown	Poorly characterized
alt76_00707	aspartate kinase	NA	NA	K00928	lysC; aspartate kinase	Cysteine and methionine metabolism [PATH:ko00270]	Amino acid metabolism
alt76_00708	methyl-accepting chemotaxis sensory transducer	NA	NA	K03406	mcp; methyl-accepting chemotaxis protein	Bacterial motility proteins [BR:ko02035]	Cell motility
alt76_00709	bis(5'nucleosyl)-tetraphosphatase ApaH	NA	NA	K01525	apaH; bis(5'-nucleosyl)-tetraphosphatase (symmetrical)	Purine metabolism [PATH:ko00230]	Nucleotide metabolism
alt76_00710	ApaG protein	NA	NA	K06195	apaG; ApaG protein	Inorganic ion transport and metabolism	Cellular processes and signaling
alt76_00711	dimethyladenosine transferase	NA	NA	K02528	ksgA; 16S rRNA (adenine1518-N6/adenine1519-N6)-dimethyltransferase	Ribosome biogenesis [BR:ko03009]	Translation
alt76_00712	4-hydroxythreonine-4-phosphate dehydrogenase	NA	NA	K00097	pdxA; 4-hydroxythreonine-4-phosphate dehydrogenase	Vitamin B6 metabolism [PATH:ko00750]	Metabolism of cofactors and vitamins
alt76_00713	periplasmic chaperone for outer membrane proteins SurA	NA	NA	K03771	surA; peptidyl-prolyl cis-trans isomerase SurA	Chaperones and folding catalysts [BR:ko03110]	Folding, sorting and degradation
alt76_00714	LPS-assembly protein	NA	NA	K04744	lptD, imp, ostA; LPS-assembly protein	Transporters [BR:ko02000]	Membrane transport
alt76_00715	DnaJ like chaperone protein	NA	NA	K05801	djlA; DnaJ like chaperone protein	Chaperones and folding catalysts [BR:ko03110]	Folding, sorting and degradation
alt76_00716	integrase/recombinase XerD	NA	NA	K04763	xerD; integrase/recombinase XerD	Chromosome and associated proteins [BR:ko03036]	Replication and repair
alt76_00717	thiol:disulfide interchange protein DsbC	NA	NA	K03981	dsbC; thiol:disulfide interchange protein DsbC	Chaperones and folding catalysts [BR:ko03110]	Folding, sorting and degradation
alt76_00718	exonuclease RecJ	NA	NA	K07462	recJ; single-stranded-DNA-specific exonuclease	Base excision repair [PATH:ko03410]	Replication and repair
alt76_00719	hypothetical protein	NA	NA	NA	NA	NA	NA
alt76_00720	DNA replication and repair protein RecO	NA	NA	K03584	recO; DNA repair protein RecO (recombination protein O)	Homologous recombination [PATH:ko03440]	Replication and repair
alt76_00721	pyridoxine 5'-phosphate synthase	NA	NA	K03474	pdxJ; pyridoxine 5-phosphate synthase	Vitamin B6 metabolism [PATH:ko00750]	Metabolism of cofactors and vitamins
alt76_00722	holo-[acyl-carrier protein] synthase	NA	NA	K00997	acpS; holo-[acyl-carrier protein] synthase	Pantothenate and CoA biosynthesis [PATH:ko00770]	Metabolism of cofactors and vitamins
alt76_00723	23S rRNA m(5)U-1939 methyltransferase	NA	NA	K03215	rumA; 23S rRNA (uracil1939-C5)-methyltransferase	Ribosome biogenesis [BR:ko03009]	Translation
alt76_00724	(p)ppGpp synthetase I SpoT/RelA	NA	NA	K00951	relA; GTP pyrophosphokinase	Purine metabolism [PATH:ko00230]	Nucleotide metabolism
alt76_00725	ATP diphosphatase	NA	NA	K04765	mazG; nucleoside triphosphate diphosphatase	Purine metabolism [PATH:ko00230]	Nucleotide metabolism
alt76_00726	tetratricopeptide repeat protein	NA	NA	NA	NA	NA	NA
alt76_00727	LSU ribosomal protein L13P	NA	NA	K02871	RP-L13, MRPL13, rplM; large subunit ribosomal protein L13	Ribosome [PATH:ko03010]	Translation
alt76_00728	SSU ribosomal protein S9P	NA	NA	K02996	RP-S9, MRPS9, rpsI; small subunit ribosomal protein S9	Ribosome [BR:ko03011]	Translation
alt76_00729	ubiquinol-cytochrome c reductase iron-sulfur subunit	NA	NA	K00411	UQCRFS1, RIP1, petA; ubiquinol-cytochrome c reductase iron-sulfur subunit	Two-component system [PATH:ko02020]	Signal transduction
alt76_00730	ubiquinol-cytochrome c reductase cytochrome b subunit	NA	NA	K00412	CYTB, petB; ubiquinol-cytochrome c reductase cytochrome b subunit	Two-component system [PATH:ko02020]	Signal transduction
alt76_00731	ubiquinol-cytochrome c reductase cytochrome c1 subunit	NA	NA	K00413	CYC1, CYT1, petC; ubiquinol-cytochrome c reductase cytochrome c1 subunit	Parkinson's disease [PATH:ko05012]	Neurodegenerative diseases
alt76_00732	RNA polymerase-associated protein	NA	NA	K03599	sspA, mglA; stringent starvation protein A	Transporters [BR:ko02000]	Membrane transport
alt76_00733	stringent starvation protein B	NA	NA	K03600	sspB; stringent starvation protein B	Transcription machinery [BR:ko03021]	Transcription
alt76_00734	AraC family transcriptional regulator	NA	NA	NA	NA	NA	NA
alt76_00735	hypothetical protein	NA	NA	NA	NA	NA	NA
alt76_00736	magnesium transporter	NA	NA	K06213	mgtE; magnesium transporter	Transporters [BR:ko02000]	Membrane transport
alt76_00737	HPr-like nitrogen-regulatory protein NPr	NA	NA	K08485	PTS-HPR.PTSO, ptsO, npr; phosphocarrier protein NPr	Transporters [BR:ko02000]	Membrane transport
alt76_00738	UPF0042 nucleotide-binding protein	NA	NA	K06958	rapZ; RNase adapter protein RapZ	Messenger RNA Biogenesis [BR:ko03019]	Translation
alt76_00739	phosphotransferase IIA-like nitrogen-regulatory protein PtsN	NA	NA	K02806	PTS-Ntr-EIIA, ptsN; PTS system, nitrogen regulatory IIA component	Phosphotransferase system (PTS) [PATH:ko02060]	Membrane transport
alt76_00740	sigma 54 modulation protein	NA	NA	K05808	yhbH; putative sigma-54 modulation protein	Ribosome biogenesis [BR:ko03009]	Translation
alt76_00741	RNA polymerase RpoN-/SigL-like sigma 54 subunit	NA	NA	K03092	SIG54, rpoN; RNA polymerase sigma-54 factor	Transcription machinery [BR:ko03021]	Transcription
alt76_00742	lipopolysaccharide export system ATP-binding protein	NA	NA	K06861	lptB; lipopolysaccharide export system ATP-binding protein	Transporters [BR:ko02000]	Membrane transport
alt76_00743	lipopolysaccharide export system protein LptA	NA	NA	K09774	lptA; lipopolysaccharide export system protein LptA	Transporters [BR:ko02000]	Membrane transport
alt76_00744	lipopolysaccharide export system protein LptC	NA	NA	K11719	lptC; lipopolysaccharide export system protein LptC	Transporters [BR:ko02000]	Membrane transport
alt76_00745	3-deoxy-D-manno-octulosonate 8-phosphate phosphatase (KDO 8-P phosphatase)	NA	NA	K03270	kdsC; 3-deoxy-D-manno-octulosonate 8-phosphate phosphatase (KDO 8-P phosphatase)	Lipopolysaccharide biosynthesis [PATH:ko00540]	Glycan biosynthesis and metabolism
alt76_00746	arabinose-5-phosphate isomerase	NA	NA	K06041	kdsD, kpsF; arabinose-5-phosphate isomerase	Lipopolysaccharide biosynthesis [PATH:ko00540]	Glycan biosynthesis and metabolism
alt76_00747	cation:H+ antiporter	NA	NA	K07301	yrbG; cation:H+ antiporter	Transporters [BR:ko02000]	Membrane transport
alt76_00748	phospholipid/cholesterol/gamma-HCH transport system ATP-binding protein	NA	NA	K02065	mlaF, linL, mkl; phospholipid/cholesterol/gamma-HCH transport system ATP-binding protein	Transporters [BR:ko02000]	Membrane transport
alt76_00749	phospholipid/cholesterol/gamma-HCH transport system permease protein	NA	NA	K02066	mlaE, linK; phospholipid/cholesterol/gamma-HCH transport system permease protein	Transporters [BR:ko02000]	Membrane transport
alt76_00750	phospholipid/cholesterol/gamma-HCH transport system substrate-binding protein	NA	NA	K02067	mlaD, linM; phospholipid/cholesterol/gamma-HCH transport system substrate-binding protein	ABC transporters [PATH:ko02010]	Membrane transport
alt76_00751	phospholipid transport system substrate-binding protein	NA	NA	K07323	mlaC; phospholipid transport system substrate-binding protein	ABC transporters [PATH:ko02010]	Membrane transport
alt76_00752	phospholipid transport system transporter-binding protein	NA	NA	NA	NA	NA	NA
alt76_00753	acid stress-induced BolA-like protein IbaG/YrbA	NA	NA	NA	NA	NA	NA
alt76_00754	UDP-N-acetylglucosamine 1-carboxyvinyltransferase	NA	NA	K00790	murA; UDP-N-acetylglucosamine 1-carboxyvinyltransferase	Peptidoglycan biosynthesis [PATH:ko00550]	Glycan biosynthesis and metabolism
alt76_00755	DegS peptidase	NA	NA	K04691	hhoB, degS; serine protease DegS	Peptidases [BR:ko01002]	Enzyme families	MER0248772	subfamily S1C unassigned peptidases	1.2e-200
alt76_00756	peptidase Do	NA	NA	K04771	degP, htrA; serine protease Do	Two-component system [PATH:ko02020]	Signal transduction	MER0987068	subfamily S9A non-peptidase homologues	1.2e-156
alt76_00757	hypothetical protein	NA	NA	NA	NA	NA	NA
alt76_00758	cell division protein ZapE	NA	NA	K06916	zapE; cell division protein ZapE	Chromosome and associated proteins [BR:ko03036]	Replication and repair
alt76_00759	YebC/PmpR family DNA-binding regulatory protein	NA	NA	NA	NA	NA	NA
alt76_00760	predicted membrane protein DUF2306	NA	NA	NA	NA	NA	NA
alt76_00761	AraC-like DNA-binding protein	NA	NA	NA	NA	NA	NA
alt76_00762	uncharacterized protein DUF421	NA	NA	NA	NA	NA	NA
alt76_00763	hypothetical protein	NA	NA	NA	NA	NA	NA
alt76_00764	SecD/SecF fusion protein	NA	NA	K12257	secDF; SecD/SecF fusion protein	Protein export [PATH:ko03060]	Folding, sorting and degradation
alt76_00765	potassium/proton antiporter (CPA1 family)	NA	NA	K11105	cvrA, nhaP2; cell volume regulation protein A	Transporters [BR:ko02000]	Membrane transport
alt76_00768	diguanylate cyclase (GGDEF)-like protein	NA	NA	NA	NA	NA	NA
alt76_00769	PAS domain S-box-containing protein	NA	NA	K20974	K20974; two-component system, sensor histidine kinase	Protein kinases [BR:ko01001]	Enzyme families
alt76_00770	amino acid/amide ABC transporter substrate-binding protein (HAAT family)	NA	NA	NA	NA	NA	NA
alt76_00771	AraC family transcriptional regulator	NA	NA	NA	NA	NA	NA
alt76_00772	NADP-dependent alcohol dehydrogenase	NA	NA	K08325	yqhD; NADP-dependent alcohol dehydrogenase	Propanoate metabolism [PATH:ko00640]	Carbohydrate metabolism
alt76_00773	hypothetical protein	NA	NA	NA	NA	NA	NA
alt76_00774	hypothetical protein	NA	NA	NA	NA	NA	NA
alt76_00775	adenylate cyclase	NA	NA	NA	NA	NA	NA
alt76_00776	methionine adenosyltransferase	NA	NA	K00789	metK; S-adenosylmethionine synthetase	Cysteine and methionine metabolism [PATH:ko00270]	Amino acid metabolism
alt76_00777	transketolase	NA	NA	K00615	E2.2.1.1, tktA, tktB; transketolase	Biosynthesis of ansamycins [PATH:ko01051]	Metabolism of terpenoids and polyketides
alt76_00778	erythrose 4-phosphate dehydrogenase	NA	NA	K03472	epd; D-erythrose 4-phosphate dehydrogenase	Vitamin B6 metabolism [PATH:ko00750]	Metabolism of cofactors and vitamins
alt76_00779	phosphoglycerate kinase	NA	NA	K00927	PGK, pgk; phosphoglycerate kinase	Glycolysis / Gluconeogenesis [PATH:ko00010]	Carbohydrate metabolism
alt76_00780	fructose-bisphosphate aldolase	NA	NA	K01623	ALDO; fructose-bisphosphate aldolase, class I	Glycolysis / Gluconeogenesis [PATH:ko00010]	Carbohydrate metabolism
alt76_00781	dipeptidyl aminopeptidase/acylaminoacyl peptidase	NA	NA	NA	NA	NA	NA	MER0248158	cold-active aminopeptidase	1.0e-156
alt76_00782	Ppx/GppA phosphatase	NA	NA	K01524	ppx-gppA; exopolyphosphatase / guanosine-5'-triphosphate,3'-diphosphate pyrophosphatase	Purine metabolism [PATH:ko00230]	Nucleotide metabolism
alt76_00783	polyphosphate kinase	NA	NA	K00937	ppk; polyphosphate kinase	Messenger RNA Biogenesis [BR:ko03019]	Translation
alt76_00784	glycine cleavage system regulatory protein	NA	NA	NA	NA	NA	NA
alt76_00785	phosphate transport system permease protein	NA	NA	K02037	pstC; phosphate transport system permease protein	Transporters [BR:ko02000]	Membrane transport
alt76_00786	phosphate ABC transporter membrane protein 2 (PhoT family)	NA	NA	K02038	pstA; phosphate transport system permease protein	ABC transporters [PATH:ko02010]	Membrane transport
alt76_00787	phosphate ABC transporter ATP-binding protein (PhoT family)	NA	NA	K02036	pstB; phosphate transport system ATP-binding protein	Transporters [BR:ko02000]	Membrane transport
alt76_00788	PhoU-like phosphate uptake regulator	NA	NA	K02039	phoU; phosphate transport system protein	Inorganic ion transport and metabolism	Cellular processes and signaling
alt76_00789	PiT family inorganic phosphate transporter	NA	NA	K03306	TC.PIT; inorganic phosphate transporter, PiT family	Transport	Cellular processes and signaling
alt76_00790	nucleotide-binding universal stress UspA family protein	NA	NA	NA	NA	NA	NA
alt76_00791	LysR family transcriptional regulator	NA	NA	K04761	oxyR; LysR family transcriptional regulator, hydrogen peroxide-inducible genes activator	Biofilm formation - Escherichia coli [PATH:ko02026]	Cellular community - prokaryotes
alt76_00792	RNA polymerase sigma-70 factor (ECF subfamily)	NA	NA	K03088	SIG3.2, rpoE; RNA polymerase sigma-70 factor, ECF subfamily	Transcription machinery [BR:ko03021]	Transcription
alt76_00793	hypothetical protein	NA	NA	NA	NA	NA	NA
alt76_00794	hypothetical protein	NA	NA	NA	NA	NA	NA
alt76_00795	hypothetical protein	NA	NA	NA	NA	NA	NA
alt76_00796	hemolysin III	NA	NA	K11068	hlyIII; hemolysin III	Bacterial toxins [BR:ko02042]	Signaling molecules and interaction
alt76_00797	PAS domain S-box-containing protein/diguanylate cyclase (GGDEF)-like protein	NA	NA	NA	NA	NA	NA
alt76_00798	hypothetical protein	NA	NA	NA	NA	NA	NA
alt76_00799	hypothetical protein	NA	NA	NA	NA	NA	NA
alt76_00800	SP family sugar:H+ symporter-like MFS transporter	NA	NA	K08139	HXT; MFS transporter, SP family, sugar:H+ symporter	Transporters [BR:ko02000]	Membrane transport
alt76_00801	AraC family transcriptional regulator	NA	NA	K02529	lacI, galR; LacI family transcriptional regulator	Transcription factors [BR:ko03000]	Transcription
alt76_00802	xylulokinase	NA	NA	K00854	xylB, XYLB; xylulokinase	Pentose and glucuronate interconversions [PATH:ko00040]	Carbohydrate metabolism
alt76_00803	D-xylose isomerase	NA	NA	K01805	xylA; xylose isomerase	Fructose and mannose metabolism [PATH:ko00051]	Carbohydrate metabolism
alt76_00804	non-processive endocellulase	GH9	6.8e-116	K01179	E3.2.1.4; endoglucanase	Starch and sucrose metabolism [PATH:ko00500]	Carbohydrate metabolism
alt76_00805	AraC family transcriptional regulator	NA	NA	NA	NA	NA	NA
alt76_00806	tryptophan halogenase	NA	NA	NA	NA	NA	NA
alt76_00807	TonB-dependent receptor	NA	NA	NA	NA	NA	NA
alt76_00808	beta-glucosidase	GH3	4.5e-69	K15920	XYL4; beta-D-xylosidase 4	Amino sugar and nucleotide sugar metabolism [PATH:ko00520]	Carbohydrate metabolism
alt76_00809	DNA-binding MarR family transcriptional regulator	NA	NA	NA	NA	NA	NA
alt76_00810	Ohr subfamily peroxiredoxin	NA	NA	NA	NA	NA	NA
alt76_00811	leukotriene A-4 hydrolase/aminopeptidase	NA	NA	K01254	LTA4H; leukotriene-A4 hydrolase	Peptidases [BR:ko01002]	Enzyme families	MER0250153	methionyl aminopeptidase 1 ({Escherichia}-type)	3.5e-181
alt76_00812	peroxiredoxin	NA	NA	NA	NA	NA	NA
alt76_00813	uncharacterized YigZ family protein	NA	NA	NA	NA	NA	NA
alt76_00814	methyl-accepting chemotaxis sensory transducer with Pas/Pac sensor	NA	NA	K03406	mcp; methyl-accepting chemotaxis protein	Bacterial motility proteins [BR:ko02035]	Cell motility
alt76_00815	exodeoxyribonuclease I subunit D	NA	NA	K03547	sbcD, mre11; DNA repair protein SbcD/Mre11	DNA repair and recombination proteins [BR:ko03400]	Replication and repair
alt76_00816	exonuclease SbcC	NA	NA	K03546	sbcC, rad50; DNA repair protein SbcC/Rad50	DNA repair and recombination proteins [BR:ko03400]	Replication and repair
alt76_00817	diguanylate cyclase (GGDEF)-like protein	NA	NA	NA	NA	NA	NA
alt76_00818	hypothetical protein	NA	NA	NA	NA	NA	NA
alt76_00819	sulfotransferase family protein	NA	NA	NA	NA	NA	NA
alt76_00820	glucosamine kinase	NA	NA	K18676	gspK; glucosamine kinase	Amino sugar and nucleotide sugar metabolism [PATH:ko00520]	Carbohydrate metabolism
alt76_00821	N-acetylglucosamine 6-phosphate deacetylase	CE9	1e-97	K01443	nagA, AMDHD2; N-acetylglucosamine-6-phosphate deacetylase	Amino sugar and nucleotide sugar metabolism [PATH:ko00520]	Carbohydrate metabolism
alt76_00822	patatin-like phospholipase	NA	NA	NA	NA	NA	NA
alt76_00823	ATPase subunit of ABC transporter with duplicated ATPase domains	NA	NA	NA	NA	NA	NA
alt76_00824	calcineurin-like phosphoesterase family protein	NA	NA	NA	NA	NA	NA
alt76_00825	calcium-dependent phosphoinositide phospholipase C	NA	NA	NA	NA	NA	NA
alt76_00826	TonB-dependent receptor	NA	NA	NA	NA	NA	NA
alt76_00827	TonB-dependent receptor	NA	NA	NA	NA	NA	NA
alt76_00828	FecR family protein	NA	NA	NA	NA	NA	NA
alt76_00829	RNA polymerase sigma-70 factor (ECF subfamily)	NA	NA	NA	NA	NA	NA
alt76_00830	hypothetical protein	NA	NA	NA	NA	NA	NA
alt76_00831	PRC-barrel domain protein	NA	NA	NA	NA	NA	NA
alt76_00832	hypothetical protein	NA	NA	NA	NA	NA	NA
alt76_00833	predicted patatin/cPLA2 family phospholipase	NA	NA	NA	NA	NA	NA
alt76_00834	uncharacterized protein (TIGR02285 family)	NA	NA	NA	NA	NA	NA
alt76_00835	hypothetical protein	NA	NA	NA	NA	NA	NA
alt76_00836	carboxypeptidase family protein	NA	NA	NA	NA	NA	NA
alt76_00838	uncharacterized repeat protein (TIGR04052 family)	NA	NA	NA	NA	NA	NA
alt76_00839	hypothetical protein	NA	NA	NA	NA	NA	NA
alt76_00840	hypothetical protein	NA	NA	NA	NA	NA	NA
alt76_00841	uncharacterized protein DUF3718	NA	NA	NA	NA	NA	NA
alt76_00842	holin-like protein	NA	NA	NA	NA	NA	NA
alt76_00843	putative effector of murein hydrolase	NA	NA	NA	NA	NA	NA
alt76_00844	response regulator receiver domain-containing protein	NA	NA	NA	NA	NA	NA
alt76_00845	PAS domain-containing protein	NA	NA	NA	NA	NA	NA
alt76_00846	uncharacterized protein DUF1566	NA	NA	NA	NA	NA	NA
alt76_00847	uncharacterized protein DUF1566	NA	NA	NA	NA	NA	NA
alt76_00848	DUF2884 family protein	NA	NA	NA	NA	NA	NA
alt76_00849	oxygen-independent coproporphyrinogen-3 oxidase	NA	NA	NA	NA	NA	NA
alt76_00850	XTP/dITP diphosphohydrolase	NA	NA	K02428	rdgB; XTP/dITP diphosphohydrolase	Purine metabolism [PATH:ko00230]	Nucleotide metabolism
alt76_00851	ATP-dependent RNA helicase SrmB	NA	NA	K05590	srmB; ATP-dependent RNA helicase SrmB	Ribosome biogenesis [BR:ko03009]	Translation
alt76_00852	tRNA nucleotidyltransferase (CCA-adding enzyme)	NA	NA	K00974	cca; tRNA nucleotidyltransferase (CCA-adding enzyme)	RNA transport [PATH:ko03013]	Translation
alt76_00853	type II secretion system protein A	NA	NA	NA	NA	NA	NA
alt76_00854	general secretion pathway protein B	NA	NA	NA	NA	NA	NA
alt76_00855	HD-GYP domain-containing protein (c-di-GMP phosphodiesterase class II)	NA	NA	NA	NA	NA	NA
alt76_00856	3-isopropylmalate dehydratase small subunit	NA	NA	K01704	leuD, IPMI-S; 3-isopropylmalate/(R)-2-methylmalate dehydratase small subunit	C5-Branched dibasic acid metabolism [PATH:ko00660]	Carbohydrate metabolism
alt76_00857	3-isopropylmalate dehydratase large subunit	NA	NA	K01703	leuC, IPMI-L; 3-isopropylmalate/(R)-2-methylmalate dehydratase large subunit	Glucosinolate biosynthesis [PATH:ko00966]	Biosynthesis of other secondary metabolites
alt76_00858	3-isopropylmalate dehydrogenase	NA	NA	K00052	leuB, IMDH; 3-isopropylmalate dehydrogenase	Valine, leucine and isoleucine biosynthesis [PATH:ko00290]	Amino acid metabolism
alt76_00859	2-isopropylmalate synthase	NA	NA	K01649	leuA, IMS; 2-isopropylmalate synthase	Valine, leucine and isoleucine biosynthesis [PATH:ko00290]	Amino acid metabolism
alt76_00860	pimeloyl-ACP methyl ester carboxylesterase	NA	NA	NA	NA	NA	NA
alt76_00861	hypothetical protein	NA	NA	NA	NA	NA	NA
alt76_00862	mannose-6-phosphate isomerase	NA	NA	K01809	manA, MPI; mannose-6-phosphate isomerase	Fructose and mannose metabolism [PATH:ko00051]	Carbohydrate metabolism
alt76_00863	Mn2+/Fe2+ NRAMP family transporter	NA	NA	NA	NA	NA	NA
alt76_00864	D-mannonate dehydratase	NA	NA	K01686	uxuA; mannonate dehydratase	Pentose and glucuronate interconversions [PATH:ko00040]	Carbohydrate metabolism
alt76_00865	fructuronate reductase	NA	NA	K00040	uxuB; fructuronate reductase	Pentose and glucuronate interconversions [PATH:ko00040]	Carbohydrate metabolism
alt76_00866	TonB-dependent receptor	NA	NA	NA	NA	NA	NA
alt76_00867	enolase	NA	NA	K01689	ENO, eno; enolase	Methane metabolism [PATH:ko00680]	Energy metabolism
alt76_00868	CTP synthase	NA	NA	K01937	pyrG, CTPS; CTP synthase	Pyrimidine metabolism [PATH:ko00240]	Nucleotide metabolism
alt76_00869	DNA mismatch repair protein MutS	NA	NA	K03555	mutS; DNA mismatch repair protein MutS	DNA repair and recombination proteins [BR:ko03400]	Replication and repair
alt76_00870	nicotinamide-nucleotide amidase	NA	NA	K03743	pncC; nicotinamide-nucleotide amidase	Nicotinate and nicotinamide metabolism [PATH:ko00760]	Metabolism of cofactors and vitamins
alt76_00871	recombination protein RecA	NA	NA	K03553	recA; recombination protein RecA	Homologous recombination [PATH:ko03440]	Replication and repair
alt76_00872	sodium transport system ATP-binding protein	NA	NA	K01990	ABC-2.A; ABC-2 type transport system ATP-binding protein	Transporters [BR:ko02000]	Membrane transport
alt76_00873	sodium transport system permease protein	NA	NA	K09696	natB; sodium transport system permease protein	Two-component system [PATH:ko02020]	Signal transduction
alt76_00874	hypothetical protein	NA	NA	NA	NA	NA	NA
alt76_00875	flagellar biosynthesis protein	NA	NA	K04061	flhB2; flagellar biosynthesis protein	Secretion system [BR:ko02044]	Membrane transport
alt76_00876	flagellar hook-length control protein FliK	NA	NA	NA	NA	NA	NA
alt76_00877	heme exporter protein A	NA	NA	K02193	ccmA; heme exporter protein A	ABC transporters [PATH:ko02010]	Membrane transport
alt76_00878	heme exporter protein B	NA	NA	K02194	ccmB; heme exporter protein B	ABC transporters [PATH:ko02010]	Membrane transport
alt76_00879	heme exporter protein C	NA	NA	K02195	ccmC; heme exporter protein C	Transporters [BR:ko02000]	Membrane transport
alt76_00880	heme exporter protein D	NA	NA	NA	NA	NA	NA
alt76_00881	cytochrome c-type biogenesis protein CcmE	NA	NA	K02197	ccmE; cytochrome c-type biogenesis protein CcmE	Membrane and intracellular structural molecules	Cellular processes and signaling
alt76_00882	cytochrome c-type biogenesis protein CcmF	NA	NA	K02198	ccmF; cytochrome c-type biogenesis protein CcmF	Transporters [BR:ko02000]	Membrane transport
alt76_00883	cytochrome c biogenesis protein CcmG/thiol:disulfide interchange protein DsbE	NA	NA	K02199	ccmG, dsbE; cytochrome c biogenesis protein CcmG, thiol:disulfide interchange protein DsbE	Chaperones and folding catalysts [BR:ko03110]	Folding, sorting and degradation
alt76_00884	cytochrome c-type biogenesis protein CcmH	NA	NA	K02200	ccmH; cytochrome c-type biogenesis protein CcmH	Membrane and intracellular structural molecules	Cellular processes and signaling
alt76_00885	cytochrome c-type biogenesis protein CcmI	NA	NA	NA	NA	NA	NA
alt76_00886	phospholipid-binding lipoprotein MlaA	NA	NA	K04754	mlaA, vacJ; phospholipid-binding lipoprotein MlaA	Membrane and intracellular structural molecules	Cellular processes and signaling
alt76_00887	UDP-galactose 4-epimerase	NA	NA	K01784	galE, GALE; UDP-glucose 4-epimerase	Amino sugar and nucleotide sugar metabolism [PATH:ko00520]	Carbohydrate metabolism
alt76_00888	hypothetical protein	NA	NA	NA	NA	NA	NA
alt76_00889	POT family proton-dependent oligopeptide transporter	NA	NA	K03305	TC.POT; proton-dependent oligopeptide transporter, POT family	Transport	Cellular processes and signaling
alt76_00890	capsular polysaccharide transport system permease protein	NA	NA	K10107	ABC-2.CPSE.P1; capsular polysaccharide transport system permease protein	Transporters [BR:ko02000]	Membrane transport
alt76_00891	capsular polysaccharide transport system ATP-binding protein	NA	NA	K09691	ABC-2.LPSE.A; lipopolysaccharide transport system ATP-binding protein	ABC transporters [PATH:ko02010]	Membrane transport
alt76_00892	capsular polysaccharide transport system permease protein	NA	NA	NA	NA	NA	NA
alt76_00893	protein involved in polysaccharide export with SLBB domain	NA	NA	K01991	ABC-2.OM, wza; polysaccharide biosynthesis/export protein	Biofilm formation - Escherichia coli [PATH:ko02026]	Cellular community - prokaryotes
alt76_00894	hypothetical protein	NA	NA	NA	NA	NA	NA
alt76_00895	hypothetical protein	NA	NA	NA	NA	NA	NA
alt76_00896	UDP-GlcNAc:undecaprenyl-phosphate GlcNAc-1-phosphate transferase	NA	NA	K02851	wecA, tagO, rfe; UDP-GlcNAc:undecaprenyl-phosphate/decaprenyl-phosphate GlcNAc-1-phosphate transferase	Lipopolysaccharide biosynthesis proteins [BR:ko01005]	Glycan biosynthesis and metabolism
alt76_00897	glycosyl transferase family 2	NA	NA	K19423	epsE; glycosyltransferase EpsE	Glycosyltransferases [BR:ko01003]	Glycan biosynthesis and metabolism
alt76_00898	rhamnosyltransferase	NA	NA	K12990	rfbF, rhlC; rhamnosyltransferase	Quorum sensing [PATH:ko02024]	Cellular community - prokaryotes
alt76_00899	UDP-glucose pyrophosphorylase	NA	NA	K00963	UGP2, galU, galF; UTP--glucose-1-phosphate uridylyltransferase	Amino sugar and nucleotide sugar metabolism [PATH:ko00520]	Carbohydrate metabolism
alt76_00900	competence protein ComEA	NA	NA	K02237	comEA; competence protein ComEA	Secretion system [BR:ko02044]	Membrane transport
alt76_00901	isocitrate dehydrogenase (NAD+)	NA	NA	K00030	IDH3; isocitrate dehydrogenase (NAD+)	Citrate cycle (TCA cycle) [PATH:ko00020]	Carbohydrate metabolism
alt76_00902	hypothetical protein	NA	NA	NA	NA	NA	NA
alt76_00903	Beta-barrel assembly machine subunit BamE	NA	NA	NA	NA	NA	NA
alt76_00904	hypothetical protein	NA	NA	K06966	K06966; uncharacterized protein	Function unknown	Poorly characterized
alt76_00905	diguanylate cyclase (GGDEF)-like protein	NA	NA	K13590	dgcB; diguanylate cyclase	Cell cycle - Caulobacter [PATH:ko04112]	Cell growth and death
alt76_00906	7-cyano-7-deazaguanine reductase	NA	NA	K06879	queF; 7-cyano-7-deazaguanine reductase	Transfer RNA biogenesis [BR:ko03016]	Translation
alt76_00907	SecY interacting protein Syd	NA	NA	K15723	syd; SecY interacting protein Syd	Cell motility and secretion	Cellular processes and signaling
alt76_00908	hypothetical protein	NA	NA	NA	NA	NA	NA
alt76_00909	uncharacterized protein DUF3192	NA	NA	NA	NA	NA	NA
alt76_00910	acetyltransferase (GNAT) family protein	NA	NA	NA	NA	NA	NA
alt76_00911	hypothetical protein	NA	NA	NA	NA	NA	NA
alt76_00912	DNA polymerase V	NA	NA	K03502	DPO5C, umuC; DNA polymerase V	DNA repair and recombination proteins [BR:ko03400]	Replication and repair
alt76_00913	DNA polymerase V	NA	NA	K03503	DPO5D, umuD; DNA polymerase V	DNA repair and recombination proteins [BR:ko03400]	Replication and repair
alt76_00914	hypothetical protein	NA	NA	NA	NA	NA	NA
alt76_00915	hypothetical protein	NA	NA	NA	NA	NA	NA
alt76_00916	DnaJ-like protein	NA	NA	NA	NA	NA	NA
alt76_00917	hypothetical protein	NA	NA	NA	NA	NA	NA
alt76_00918	hypothetical protein	NA	NA	NA	NA	NA	NA
alt76_00919	hypothetical protein	NA	NA	NA	NA	NA	NA
alt76_00920	hypothetical protein	NA	NA	NA	NA	NA	NA
alt76_00921	hypothetical protein	NA	NA	NA	NA	NA	NA
alt76_00922	hypothetical protein	NA	NA	NA	NA	NA	NA
alt76_00923	5'(3')-deoxyribonucleotidase	NA	NA	K01081	E3.1.3.5; 5'-nucleotidase	Purine metabolism [PATH:ko00230]	Nucleotide metabolism
alt76_00924	hypothetical protein	NA	NA	NA	NA	NA	NA
alt76_00925	hypothetical protein	NA	NA	NA	NA	NA	NA
alt76_00926	hypothetical protein	NA	NA	K06915	K06915; uncharacterized protein	Function unknown	Poorly characterized
alt76_00927	hypothetical protein	NA	NA	NA	NA	NA	NA
alt76_00928	hypothetical protein	NA	NA	NA	NA	NA	NA
alt76_00929	hypothetical protein	NA	NA	NA	NA	NA	NA
alt76_00930	hypothetical protein	NA	NA	NA	NA	NA	NA
alt76_00931	TniQ protein	NA	NA	NA	NA	NA	NA
alt76_00932	TniB protein	NA	NA	NA	NA	NA	NA
alt76_00933	integrase-like protein	NA	NA	NA	NA	NA	NA
alt76_00934	hypothetical protein	NA	NA	NA	NA	NA	NA
alt76_00935	hypothetical protein	NA	NA	NA	NA	NA	NA
alt76_00936	uncharacterized protein DUF1524	NA	NA	NA	NA	NA	NA
alt76_00937	hypothetical protein	NA	NA	NA	NA	NA	NA
alt76_00938	hypothetical protein	NA	NA	NA	NA	NA	NA
alt76_00939	HEPN domain-containing protein	NA	NA	NA	NA	NA	NA
alt76_00940	hypothetical protein	NA	NA	NA	NA	NA	NA
alt76_00941	hypothetical protein	NA	NA	NA	NA	NA	NA
alt76_00942	hypothetical protein	NA	NA	NA	NA	NA	NA
alt76_00943	T5orf172 domain-containing protein	NA	NA	NA	NA	NA	NA
alt76_00944	hypothetical protein	NA	NA	NA	NA	NA	NA
alt76_00945	hypothetical protein	NA	NA	NA	NA	NA	NA
alt76_00946	hypothetical protein	NA	NA	NA	NA	NA	NA
alt76_00947	uncharacterized protein DUF3301	NA	NA	NA	NA	NA	NA
alt76_00948	uncharacterized protein DUF3549	NA	NA	NA	NA	NA	NA
alt76_00949	uncharacterized protein YqcC (DUF446 family)	NA	NA	NA	NA	NA	NA
alt76_00950	tRNA pseudouridine synthase C	NA	NA	K06175	truC; tRNA pseudouridine65 synthase	Transfer RNA biogenesis [BR:ko03016]	Translation
alt76_00951	flavodoxin	NA	NA	K06205	mioC; MioC protein	Energy metabolism	Metabolism
alt76_00952	2,3,4,5-tetrahydropyridine-2-carboxylate N-succinyltransferase	NA	NA	K00674	dapD; 2,3,4,5-tetrahydropyridine-2,6-dicarboxylate N-succinyltransferase	Lysine biosynthesis [PATH:ko00300]	Amino acid metabolism
alt76_00953	UTP--GlnB (protein PII) uridylyltransferase GlnD	NA	NA	K00990	glnD; [protein-PII] uridylyltransferase	Two-component system [PATH:ko02020]	Signal transduction
alt76_00954	methionine aminopeptidase type I	NA	NA	K01265	map; methionyl aminopeptidase	Peptidases [BR:ko01002]	Enzyme families
alt76_00956	SSU ribosomal protein S2P	NA	NA	K02967	RP-S2, MRPS2, rpsB; small subunit ribosomal protein S2	Ribosome [BR:ko03011]	Translation
alt76_00957	translation elongation factor Ts (EF-Ts)	NA	NA	K02357	tsf, TSFM; elongation factor Ts	Mitochondrial biogenesis [BR:ko03029]	Translation
alt76_00958	uridylate kinase	NA	NA	K09903	pyrH; uridylate kinase	Pyrimidine metabolism [PATH:ko00240]	Nucleotide metabolism
alt76_00959	ribosome recycling factor	NA	NA	K02838	frr, MRRF, RRF; ribosome recycling factor	Translation factors [BR:ko03012]	Translation
alt76_00960	undecaprenyl pyrophosphate synthetase	NA	NA	K00806	uppS; undecaprenyl diphosphate synthase	Terpenoid backbone biosynthesis [PATH:ko00900]	Metabolism of terpenoids and polyketides
alt76_00961	phosphatidate cytidylyltransferase	NA	NA	K00981	E2.7.7.41, CDS1, CDS2, cdsA; phosphatidate cytidylyltransferase	Phosphatidylinositol signaling system [PATH:ko04070]	Signal transduction
alt76_00962	1-deoxy-D-xylulose 5-phosphate reductoisomerase	NA	NA	K00099	dxr; 1-deoxy-D-xylulose-5-phosphate reductoisomerase	Terpenoid backbone biosynthesis [PATH:ko00900]	Metabolism of terpenoids and polyketides	MER0895204	subfamily M50B unassigned peptidases	2.9e-294
alt76_00963	site-2 protease	NA	NA	K11749	rseP; regulator of sigma E protease	Cell cycle - Caulobacter [PATH:ko04112]	Cell growth and death
alt76_00964	Beta-barrel assembly machine subunit BamA	NA	NA	K07277	SAM50, TOB55, bamA; outer membrane protein insertion porin family	Transporters [BR:ko02000]	Membrane transport
alt76_00965	periplasmic chaperone for outer membrane proteins Skp	NA	NA	K06142	hlpA, ompH; outer membrane protein	Membrane and intracellular structural molecules	Cellular processes and signaling
alt76_00966	3-hydroxyacyl-[acyl-carrier-protein] dehydratase	NA	NA	K02372	fabZ; 3-hydroxyacyl-[acyl-carrier-protein] dehydratase	Fatty acid biosynthesis [PATH:ko00061]	Lipid metabolism
alt76_00967	acyl-[acyl-carrier-protein]--UDP-N-acetylglucosamine O-acyltransferase	NA	NA	K00677	lpxA; UDP-N-acetylglucosamine acyltransferase	Lipopolysaccharide biosynthesis proteins [BR:ko01005]	Glycan biosynthesis and metabolism
alt76_00968	lipid-A-disaccharide synthase	GT19	4.9e-133	K00748	lpxB; lipid-A-disaccharide synthase	Glycosyltransferases [BR:ko01003]	Glycan biosynthesis and metabolism
alt76_00969	RNase HII	NA	NA	K03470	rnhB; ribonuclease HII	DNA replication [PATH:ko03030]	Replication and repair
alt76_00970	DNA polymerase-3 subunit alpha	NA	NA	K02337	DPO3A1, dnaE; DNA polymerase III subunit alpha	DNA replication proteins [BR:ko03032]	Replication and repair
alt76_00971	acetyl-CoA carboxylase carboxyltransferase subunit alpha	NA	NA	K01962	accA; acetyl-CoA carboxylase carboxyl transferase subunit alpha	Carbon fixation pathways in prokaryotes [PATH:ko00720]	Energy metabolism
alt76_00972	tRNA(Ile)-lysidine synthase	NA	NA	K04075	tilS, mesJ; tRNA(Ile)-lysidine synthase	Transfer RNA biogenesis [BR:ko03016]	Translation
alt76_00973	diguanylate cyclase (GGDEF)-like protein	NA	NA	NA	NA	NA	NA
alt76_00974	Kef-type potassium/proton antiporter (CPA2 family)	NA	NA	K03455	TC.KEF; monovalent cation:H+ antiporter-2, CPA2 family	Transport	Cellular processes and signaling
alt76_00975	hypothetical protein	NA	NA	NA	NA	NA	NA
alt76_00976	tRNA-adenosine deaminase	NA	NA	K11991	tadA; tRNA(adenine34) deaminase	Transfer RNA biogenesis [BR:ko03016]	Translation
alt76_00977	hypothetical protein	NA	NA	NA	NA	NA	NA
alt76_00978	membrane-bound lytic murein transglycosylase F	NA	NA	K18691	mltF; membrane-bound lytic murein transglycosylase F	Peptidoglycan biosynthesis and degradation proteins [BR:ko01011]	Glycan biosynthesis and metabolism
alt76_00979	phosphoribosylformylglycinamidine synthase	NA	NA	K01952	purL, PFAS; phosphoribosylformylglycinamidine synthase	Purine metabolism [PATH:ko00230]	Nucleotide metabolism
alt76_00980	hypothetical protein	NA	NA	NA	NA	NA	NA
alt76_00981	DNA-nicking Smr family endonuclease	NA	NA	NA	NA	NA	NA
alt76_00983	Ig-like protein group 3	NA	NA	K20276	bapA; large repetitive protein	Quorum sensing [PATH:ko02024]	Cellular community - prokaryotes
alt76_00984	adhesin transport system outer membrane protein	NA	NA	K12543	lapE; outer membrane protein, adhesin transport system	Secretion system [BR:ko02044]	Membrane transport
alt76_00985	ATP-binding cassette subfamily C protein LapB	NA	NA	K12541	lapB; ATP-binding cassette, subfamily C, bacterial LapB	Transporters [BR:ko02000]	Membrane transport
alt76_00986	adhesin transport system membrane fusion protein	NA	NA	K12542	lapC; membrane fusion protein, adhesin transport system	Transporters [BR:ko02000]	Membrane transport
alt76_00987	regulatory LuxR family protein	NA	NA	NA	NA	NA	NA
alt76_00988	diguanylate cyclase/phosphodiesterase	NA	NA	NA	NA	NA	NA	MER0248473	Zmp1 peptidase ({Mycobacterium}-type)	0.0e+00
alt76_00989	transglutaminase-like cysteine proteinase BTLCP	NA	NA	NA	NA	NA	NA
alt76_00990	flagellar assembly T-like protein	NA	NA	NA	NA	NA	NA
alt76_00991	hypothetical protein	NA	NA	NA	NA	NA	NA
alt76_00992	flagella synthesis protein FlgN	NA	NA	NA	NA	NA	NA
alt76_00993	FlgM family anti-sigma-28 factor	NA	NA	NA	NA	NA	NA
alt76_00994	flagella basal body P-ring formation protein FlgA	NA	NA	K02386	flgA; flagella basal body P-ring formation protein FlgA	Flagellar assembly [PATH:ko02040]	Cell motility
alt76_00995	response regulator receiver modulated CheW protein	NA	NA	K03415	cheV; two-component system, chemotaxis family, chemotaxis protein CheV	Two-component system [BR:ko02022]	Signal transduction
alt76_00996	CheR-type MCP methyltransferase	NA	NA	K00575	cheR; chemotaxis protein methyltransferase CheR	Two-component system [PATH:ko02020]	Signal transduction
alt76_00997	flagellar basal-body rod protein FlgB	NA	NA	K02387	flgB; flagellar basal-body rod protein FlgB	Flagellar assembly [PATH:ko02040]	Cell motility
alt76_00998	flagellar basal-body rod protein FlgC	NA	NA	K02388	flgC; flagellar basal-body rod protein FlgC	Flagellar assembly [PATH:ko02040]	Cell motility
alt76_00999	flagellar basal-body rod modification protein FlgD	NA	NA	K02389	flgD; flagellar basal-body rod modification protein FlgD	Bacterial motility proteins [BR:ko02035]	Cell motility
alt76_01000	flagellar hook protein FlgE	NA	NA	K02390	flgE; flagellar hook protein FlgE	Flagellar assembly [PATH:ko02040]	Cell motility
alt76_01001	flagellar basal-body rod protein FlgF	NA	NA	K02391	flgF; flagellar basal-body rod protein FlgF	Bacterial motility proteins [BR:ko02035]	Cell motility
alt76_01002	flagellar basal-body rod protein FlgG	NA	NA	K02392	flgG; flagellar basal-body rod protein FlgG	Bacterial motility proteins [BR:ko02035]	Cell motility
alt76_01003	flagellar L-ring protein precursor FlgH	NA	NA	K02393	flgH; flagellar L-ring protein precursor FlgH	Bacterial motility proteins [BR:ko02035]	Cell motility
alt76_01004	flagellar P-ring protein precursor FlgI	NA	NA	K02394	flgI; flagellar P-ring protein precursor FlgI	Flagellar assembly [PATH:ko02040]	Cell motility
alt76_01005	flagellar protein FlgJ	GH73	2.4e-35	K02395	flgJ; flagellar protein FlgJ	Bacterial motility proteins [BR:ko02035]	Cell motility
alt76_01006	flagellar hook-associated protein 1 FlgK	NA	NA	K02396	flgK; flagellar hook-associated protein 1 FlgK	Bacterial motility proteins [BR:ko02035]	Cell motility
alt76_01007	flagellar hook-associated protein 3 FlgL	NA	NA	K02397	flgL; flagellar hook-associated protein 3 FlgL	Flagellar assembly [PATH:ko02040]	Cell motility
alt76_01008	hypothetical protein	NA	NA	NA	NA	NA	NA
alt76_01009	flagellin	NA	NA	K02406	fliC; flagellin	NOD-like receptor signaling pathway [PATH:ko04621]	Immune system
alt76_01010	flagellin	NA	NA	K02406	fliC; flagellin	NOD-like receptor signaling pathway [PATH:ko04621]	Immune system
alt76_01011	hypothetical protein	NA	NA	NA	NA	NA	NA
alt76_01012	flagellin	NA	NA	K02406	fliC; flagellin	NOD-like receptor signaling pathway [PATH:ko04621]	Immune system
alt76_01013	flagellar protein FlaG	NA	NA	K06603	flaG; flagellar protein FlaG	Bacterial motility proteins [BR:ko02035]	Cell motility
alt76_01014	flagellar hook-associated protein 2	NA	NA	K02407	fliD; flagellar hook-associated protein 2	Bacterial motility proteins [BR:ko02035]	Cell motility
alt76_01015	flagellar protein FliS	NA	NA	K02422	fliS; flagellar protein FliS	Flagellar assembly [PATH:ko02040]	Cell motility
alt76_01016	hypothetical protein	NA	NA	NA	NA	NA	NA
alt76_01017	hypothetical protein	NA	NA	NA	NA	NA	NA
alt76_01018	NAD dependent epimerase/dehydratase	NA	NA	K01784	galE, GALE; UDP-glucose 4-epimerase	Amino sugar and nucleotide sugar metabolism [PATH:ko00520]	Carbohydrate metabolism
alt76_01019	aminotransferase in exopolysaccharide biosynthesis	NA	NA	K19430	epsN; pyridoxal phosphate-dependent aminotransferase EpsN	Glycan biosynthesis and metabolism	Metabolism
alt76_01020	WbqC-like protein	NA	NA	NA	NA	NA	NA
alt76_01021	methyltransferase family protein	NA	NA	NA	NA	NA	NA
alt76_01022	GDP/UDP-N,N'-diacetylbacillosamine 2-epimerase (hydrolysing)	NA	NA	K12409	GNE; bifunctional UDP-N-acetylglucosamine 2-epimerase / N-acetylmannosamine kinase	Amino sugar and nucleotide sugar metabolism [PATH:ko00520]	Carbohydrate metabolism
alt76_01023	protoporphyrinogen oxidase	NA	NA	NA	NA	NA	NA
alt76_01024	dTDP-4-amino-4,6-dideoxygalactose transaminase	NA	NA	NA	NA	NA	NA
alt76_01025	LmbE family N-acetylglucosaminyl deacetylase	NA	NA	K01463	bshB1; N-acetylglucosamine malate deacetylase 1	Carbohydrate metabolism	Metabolism
alt76_01026	sulfotransferase family protein	NA	NA	NA	NA	NA	NA
alt76_01027	N-acetylneuraminate synthase	NA	NA	K01654	E2.5.1.56, neuB; N-acetylneuraminate synthase	Amino sugar and nucleotide sugar metabolism [PATH:ko00520]	Carbohydrate metabolism
alt76_01028	UDP-perosamine 4-acetyltransferase	NA	NA	K19429	epsM; acetyltransferase EpsM	Glycan biosynthesis and metabolism	Metabolism
alt76_01029	CBS domain protein	NA	NA	K00966	GMPP; mannose-1-phosphate guanylyltransferase	Amino sugar and nucleotide sugar metabolism [PATH:ko00520]	Carbohydrate metabolism
alt76_01030	N-acylneuraminate cytidylyltransferase/CMP-N,N'-diacetyllegionaminic acid synthase	NA	NA	K00983	neuA; N-acylneuraminate cytidylyltransferase	Amino sugar and nucleotide sugar metabolism [PATH:ko00520]	Carbohydrate metabolism
alt76_01031	hypothetical protein	NA	NA	NA	NA	NA	NA
alt76_01032	CDP-glycerol glycerophosphotransferase (TagB/SpsB family)	NA	NA	K18704	tarL; CDP-ribitol ribitolphosphotransferase / teichoic acid ribitol-phosphate polymerase	Glycan biosynthesis and metabolism	Metabolism
alt76_01033	3-oxoacyl-[acyl-carrier protein] reductase	NA	NA	NA	NA	NA	NA
alt76_01034	acyl-CoA synthetase (AMP-forming)/AMP-acid ligase II	NA	NA	NA	NA	NA	NA
alt76_01035	phosphopantetheine binding protein	NA	NA	NA	NA	NA	NA
alt76_01036	UDP-4-amino-4,6-dideoxy-N-acetyl-beta-L-altrosamine N-acetyltransferase	NA	NA	NA	NA	NA	NA
alt76_01037	N-acetylneuraminate synthase	NA	NA	K15898	pseI, neuB3; pseudaminic acid synthase	Amino sugar and nucleotide sugar metabolism [PATH:ko00520]	Carbohydrate metabolism
alt76_01038	UDP-2,4-diacetamido-2,4,6-trideoxy-beta-L-altropyranose hydrolase	NA	NA	NA	NA	NA	NA
alt76_01039	pseudaminic acid cytidylyltransferase	NA	NA	K15899	pseF; pseudaminic acid cytidylyltransferase	Amino sugar and nucleotide sugar metabolism [PATH:ko00520]	Carbohydrate metabolism
alt76_01040	UDP-4-amino-4,6-dideoxy-N-acetyl-beta-L-altrosamine transaminase	NA	NA	NA	NA	NA	NA
alt76_01041	UDP-N-acetylglucosamine 4,6-dehydratase	NA	NA	K15894	pseB; UDP-N-acetylglucosamine 4,6-dehydratase	Amino sugar and nucleotide sugar metabolism [PATH:ko00520]	Carbohydrate metabolism
alt76_01042	flagellin	NA	NA	NA	NA	NA	NA
alt76_01043	Fis family sigma54 specific transcriptional regulator	NA	NA	K10941	fleQ, flrA; sigma-54 dependent transcriptional regulator, flagellar regulatory protein	Transcription factors [BR:ko03000]	Transcription
alt76_01044	two-component system sensor histidine kinase FlrB	NA	NA	K10942	flrB, fleS; two-component system, sensor histidine kinase FlrB	Two-component system [PATH:ko02020]	Signal transduction
alt76_01045	two component Fis family sigma54 specific transcriptional regulator	NA	NA	K10943	flrC, fleR; two-component system, response regulator FlrC	Biofilm formation - Vibrio cholerae [PATH:ko05111]	Cellular community - prokaryotes
alt76_01046	flagellar hook-basal body complex protein FliE	NA	NA	K02408	fliE; flagellar hook-basal body complex protein FliE	Bacterial motility proteins [BR:ko02035]	Cell motility
alt76_01047	flagellar M-ring protein FliF	NA	NA	K02409	fliF; flagellar M-ring protein FliF	Bacterial motility proteins [BR:ko02035]	Cell motility
alt76_01048	flagellar motor switch protein FliG	NA	NA	K02410	fliG; flagellar motor switch protein FliG	Flagellar assembly [PATH:ko02040]	Cell motility
alt76_01049	flagellar assembly protein FliH	NA	NA	K02411	fliH; flagellar assembly protein FliH	Flagellar assembly [PATH:ko02040]	Cell motility
alt76_01050	flagellum-specific ATP synthase	NA	NA	K02412	fliI; flagellum-specific ATP synthase	Flagellar assembly [PATH:ko02040]	Cell motility
alt76_01051	flagellar FliJ protein	NA	NA	NA	NA	NA	NA
alt76_01052	flagellar hook-length control protein FliK	NA	NA	K02414	fliK; flagellar hook-length control protein FliK	Bacterial motility proteins [BR:ko02035]	Cell motility
alt76_01053	flagellar FliL protein	NA	NA	K02415	fliL; flagellar FliL protein	Bacterial motility proteins [BR:ko02035]	Cell motility
alt76_01054	flagellar motor switch protein FliM	NA	NA	K02416	fliM; flagellar motor switch protein FliM	Bacterial chemotaxis [PATH:ko02030]	Cell motility
alt76_01055	flagellar motor switch protein FliN/FliY	NA	NA	K02417	fliNY, fliN; flagellar motor switch protein FliN/FliY	Bacterial motility proteins [BR:ko02035]	Cell motility
alt76_01056	flagellar protein FliO/FliZ	NA	NA	NA	NA	NA	NA
alt76_01057	flagellar biosynthetic protein FliP	NA	NA	K02419	fliP; flagellar biosynthetic protein FliP	Secretion system [BR:ko02044]	Membrane transport
alt76_01058	flagellar biosynthetic protein FliQ	NA	NA	K02420	fliQ; flagellar biosynthetic protein FliQ	Bacterial motility proteins [BR:ko02035]	Cell motility
alt76_01059	flagellar biosynthetic protein FliR	NA	NA	K02421	fliR; flagellar biosynthetic protein FliR	Secretion system [BR:ko02044]	Membrane transport
alt76_01060	flagellar biosynthetic protein FlhB	NA	NA	K02401	flhB; flagellar biosynthetic protein FlhB	Flagellar assembly [PATH:ko02040]	Cell motility
alt76_01061	flagellar biosynthesis protein FlhA	NA	NA	K02400	flhA; flagellar biosynthesis protein FlhA	Bacterial motility proteins [BR:ko02035]	Cell motility
alt76_01062	flagellar biosynthesis protein FlhF	NA	NA	K02404	flhF; flagellar biosynthesis protein FlhF	Bacterial motility proteins [BR:ko02035]	Cell motility
alt76_01063	flagellar biosynthesis protein FlhG	NA	NA	K04562	flhG, fleN; flagellar biosynthesis protein FlhG	Bacterial motility proteins [BR:ko02035]	Cell motility
alt76_01064	RNA polymerase sigma-28 (SigD/FliA/WhiG) subunit	NA	NA	K02405	fliA; RNA polymerase sigma factor for flagellar operon FliA	Biofilm formation - Vibrio cholerae [PATH:ko05111]	Cellular community - prokaryotes
alt76_01065	response regulator receiver protein	NA	NA	K03413	cheY; two-component system, chemotaxis family, chemotaxis protein CheY	Bacterial chemotaxis [PATH:ko02030]	Cell motility
alt76_01066	chemotaxis phosphatase CheZ	NA	NA	K03414	cheZ; chemotaxis protein CheZ	Bacterial motility proteins [BR:ko02035]	Cell motility
alt76_01067	two-component system chemotaxis sensor kinase CheA	NA	NA	K03407	cheA; two-component system, chemotaxis family, sensor kinase CheA	Two-component system [BR:ko02022]	Signal transduction
alt76_01068	two-component system chemotaxis response regulator CheB	NA	NA	K03412	cheB; two-component system, chemotaxis family, protein-glutamate methylesterase/glutaminase	Two-component system [PATH:ko02020]	Signal transduction
alt76_01069	chromosome partitioning protein	NA	NA	K03496	parA, soj; chromosome partitioning protein	Chromosome and associated proteins [BR:ko03036]	Replication and repair
alt76_01070	purine-binding chemotaxis protein CheW	NA	NA	K03408	cheW; purine-binding chemotaxis protein CheW	Bacterial motility proteins [BR:ko02035]	Cell motility
alt76_01071	CheW protein	NA	NA	K03408	cheW; purine-binding chemotaxis protein CheW	Bacterial motility proteins [BR:ko02035]	Cell motility
alt76_01072	uncharacterized protein DUF2802	NA	NA	NA	NA	NA	NA
alt76_01073	homoserine O-succinyltransferase	NA	NA	K00651	metA; homoserine O-succinyltransferase	Sulfur metabolism [PATH:ko00920]	Energy metabolism
alt76_01074	5-methyltetrahydrofolate--homocysteine methyltransferase	NA	NA	K00547	mmuM, BHMT2; homocysteine S-methyltransferase	Cysteine and methionine metabolism [PATH:ko00270]	Amino acid metabolism
alt76_01075	methionine synthase (B12-dependent)	NA	NA	K00548	metH, MTR; 5-methyltetrahydrofolate--homocysteine methyltransferase	Cysteine and methionine metabolism [PATH:ko00270]	Amino acid metabolism
alt76_01076	uncharacterized protein DUF938	NA	NA	NA	NA	NA	NA
alt76_01077	LysR family transcriptional regulator for metE and metH	NA	NA	K03576	metR; LysR family transcriptional regulator, regulator for metE and metH	Transcription factors [BR:ko03000]	Transcription
alt76_01078	LysR family transcriptional regulator	NA	NA	K04761	oxyR; LysR family transcriptional regulator, hydrogen peroxide-inducible genes activator	Biofilm formation - Escherichia coli [PATH:ko02026]	Cellular community - prokaryotes
alt76_01079	carbonic anhydrase	NA	NA	K01673	cynT, can; carbonic anhydrase	Nitrogen metabolism [PATH:ko00910]	Energy metabolism
alt76_01080	SulP family sulfate permease	NA	NA	K03321	TC.SULP; sulfate permease, SulP family	Transporters [BR:ko02000]	Membrane transport
alt76_01081	outer membrane receptor protein involved in Fe transport	NA	NA	K16091	fecA; Fe(3+) dicitrate transport protein	Transporters [BR:ko02000]	Membrane transport
alt76_01082	TetR family transcriptional regulator	NA	NA	K02167	betI; TetR/AcrR family transcriptional regulator, transcriptional repressor of bet genes	Transcription factors [BR:ko03000]	Transcription
alt76_01083	putative endopeptidase	NA	NA	K01415	ECE; endothelin-converting enzyme	Exosome [BR:ko04147]	Transport and catabolism
alt76_01084	hypothetical protein	NA	NA	K09919	K09919; uncharacterized protein	Function unknown	Poorly characterized	MER0920946	subfamily M16B non-peptidase homologues	2.0e-227
alt76_01085	regulatory protein	NA	NA	K03565	recX; regulatory protein	DNA repair and recombination proteins [BR:ko03400]	Replication and repair
alt76_01086	alanyl-tRNA synthetase	NA	NA	K01872	AARS, alaS; alanyl-tRNA synthetase	Amino acid related enzymes [BR:ko01007]	Amino acid metabolism
alt76_01087	carbon storage regulator CsrA	NA	NA	K03563	csrA; carbon storage regulator	Two-component system [PATH:ko02020]	Signal transduction
alt76_01091	hypothetical protein	NA	NA	NA	NA	NA	NA
alt76_01092	oxaloacetate decarboxylase gamma subunit	NA	NA	NA	NA	NA	NA
alt76_01093	oxaloacetate decarboxylase alpha subunit	NA	NA	K01571	oadA; oxaloacetate decarboxylase, alpha subunit	Pyruvate metabolism [PATH:ko00620]	Carbohydrate metabolism
alt76_01094	oxaloacetate decarboxylase beta subunit	NA	NA	K01572	oadB; oxaloacetate decarboxylase, beta subunit	Pyruvate metabolism [PATH:ko00620]	Carbohydrate metabolism
alt76_01095	cationic peptide transport system ATP-binding protein	NA	NA	K12372	dppF; dipeptide transport system ATP-binding protein	Transporters [BR:ko02000]	Membrane transport
alt76_01096	cationic peptide transport system ATP-binding protein	NA	NA	K19229	sapD; cationic peptide transport system ATP-binding protein	Cationic antimicrobial peptide (CAMP) resistance [PATH:ko01503]	Drug resistance
alt76_01097	cationic peptide transport system permease protein	NA	NA	K19228	sapC; cationic peptide transport system permease protein	Cationic antimicrobial peptide (CAMP) resistance [PATH:ko01503]	Drug resistance
alt76_01098	cationic peptide transport system permease protein	NA	NA	K12369	dppB; dipeptide transport system permease protein	ABC transporters [PATH:ko02010]	Membrane transport
alt76_01099	cationic peptide transport system substrate-binding protein	NA	NA	K12368	dppA; dipeptide transport system substrate-binding protein	ABC transporters [PATH:ko02010]	Membrane transport
alt76_01100	Fis family sigma54 specific transcriptional regulator	NA	NA	K03974	pspF; psp operon transcriptional activator	Transcription factors [BR:ko03000]	Transcription
alt76_01101	phage shock protein A (PspA) family protein	NA	NA	K03969	pspA; phage shock protein A	Others	Genetic information processing
alt76_01102	phage shock protein B	NA	NA	K03970	pspB; phage shock protein B	Prokaryotic Defense System [BR:ko02048]	Transport and catabolism
alt76_01103	phage shock protein C (PspC) family protein	NA	NA	K03973	pspC; phage shock protein C	Prokaryotic Defense System [BR:ko02048]	Transport and catabolism
alt76_01104	phenylalanine 4-hydroxylase	NA	NA	K00500	phhA, PAH; phenylalanine-4-hydroxylase	Phenylalanine, tyrosine and tryptophan biosynthesis [PATH:ko00400]	Amino acid metabolism
alt76_01105	transcriptional regulator TyrR	NA	NA	K03721	tyrR; transcriptional regulator of aroF, aroG, tyrA and aromatic amino acid transport	Transcription factors [BR:ko03000]	Transcription
alt76_01106	fumarylacetoacetate (FAA) hydrolase	NA	NA	K16171	faaH; fumarylacetoacetate (FAA) hydrolase	Tyrosine metabolism [PATH:ko00350]	Amino acid metabolism
alt76_01107	maleylacetoacetate isomerase	NA	NA	K01800	maiA, GSTZ1; maleylacetoacetate isomerase	Tyrosine metabolism [PATH:ko00350]	Amino acid metabolism
alt76_01108	AsnC family transcriptional regulator	NA	NA	K05800	ybaO; Lrp/AsnC family transcriptional regulator	Transcription factors [BR:ko03000]	Transcription
alt76_01109	leucine dehydrogenase	NA	NA	K00263	E1.4.1.9; leucine dehydrogenase	Valine, leucine and isoleucine degradation [PATH:ko00280]	Amino acid metabolism
alt76_01111	late competence development protein ComFB	NA	NA	NA	NA	NA	NA
alt76_01112	tryptophan 2,3-dioxygenase	NA	NA	K00453	TDO2, kynA; tryptophan 2,3-dioxygenase	Tryptophan metabolism [PATH:ko00380]	Amino acid metabolism
alt76_01113	TonB-dependent receptor-like protein	NA	NA	NA	NA	NA	NA
alt76_01114	TonB-dependent receptor-like protein	NA	NA	NA	NA	NA	NA
alt76_01115	hypothetical protein	NA	NA	NA	NA	NA	NA
alt76_01116	putative 2-oxoglutarate-Fe(II)-dependent oxygenase superfamily protein	NA	NA	NA	NA	NA	NA
alt76_01117	2-oxoglutarate-Fe(II)-dependent oxygenase superfamily protein	NA	NA	NA	NA	NA	NA
alt76_01118	uncharacterized protein DUF3450	NA	NA	NA	NA	NA	NA
alt76_01119	outer membrane transport energization protein ExbB	NA	NA	NA	NA	NA	NA
alt76_01120	outer membrane transport energization protein ExbB	NA	NA	NA	NA	NA	NA
alt76_01121	outer membrane transport energization protein ExbD	NA	NA	NA	NA	NA	NA
alt76_01122	outer membrane transport energization protein TonB	NA	NA	K03832	tonB; periplasmic protein TonB	Transporters [BR:ko02000]	Membrane transport
alt76_01123	tetratricopeptide repeat protein	NA	NA	NA	NA	NA	NA
alt76_01124	tRNA(Met)-cytidine N(4)-acetyltransferase	NA	NA	K06957	tmcA; tRNA(Met) cytidine acetyltransferase	Transfer RNA biogenesis [BR:ko03016]	Translation
alt76_01125	thioesterase superfamily protein	NA	NA	NA	NA	NA	NA
alt76_01127	outer membrane receptor protein involved in Fe transport	NA	NA	NA	NA	NA	NA
alt76_01128	YKOF-related protein	NA	NA	NA	NA	NA	NA
alt76_01129	nicotinamide mononucleotide transporter	NA	NA	NA	NA	NA	NA
alt76_01130	phosphotransferase family enzyme	NA	NA	NA	NA	NA	NA
alt76_01132	hypothetical protein	NA	NA	NA	NA	NA	NA
alt76_01133	[SSU ribosomal protein S18P]-alanine acetyltransferase	NA	NA	K03789	rimI; ribosomal-protein-alanine N-acetyltransferase	Ribosome biogenesis [BR:ko03009]	Translation
alt76_01134	hypothetical protein	NA	NA	NA	NA	NA	NA
alt76_01135	drug/metabolite transporter (DMT)-like permease	NA	NA	NA	NA	NA	NA
alt76_01136	DNA-binding transcriptional LysR family regulator	NA	NA	NA	NA	NA	NA
alt76_01137	hypothetical protein	NA	NA	NA	NA	NA	NA
alt76_01138	transcriptional regulator with AbiEi antitoxin domain of type IV toxin-antitoxin system	NA	NA	NA	NA	NA	NA
alt76_01139	nucleotidyltransferase AbiEii toxin of type IV toxin-antitoxin system	NA	NA	NA	NA	NA	NA
alt76_01140	peptide chain release factor 3 (bRF-3)	NA	NA	K02837	prfC; peptide chain release factor 3	Translation factors [BR:ko03012]	Translation
alt76_01141	arginyl-tRNA synthetase	NA	NA	K01887	RARS, argS; arginyl-tRNA synthetase	Transfer RNA biogenesis [BR:ko03016]	Translation
alt76_01142	PAS domain S-box-containing protein/diguanylate cyclase (GGDEF)-like protein	NA	NA	NA	NA	NA	NA
alt76_01143	NAD(P)H-dependent FMN reductase	NA	NA	K19784	chrR; chromate reductase	Biosynthesis and biodegradation of secondary metabolites	Metabolism
alt76_01144	LysR family transcriptional regulator	NA	NA	NA	NA	NA	NA
alt76_01145	gamma-butyrobetaine dioxygenase	NA	NA	K00471	E1.14.11.1; gamma-butyrobetaine dioxygenase	Lysine degradation [PATH:ko00310]	Amino acid metabolism
alt76_01146	predicted HD phosphohydrolase	NA	NA	NA	NA	NA	NA
alt76_01147	hypothetical protein	NA	NA	NA	NA	NA	NA
alt76_01148	uncharacterized membrane protein	NA	NA	NA	NA	NA	NA
alt76_01149	peptide chain release factor 2 (bRF-2)	NA	NA	K02836	prfB; peptide chain release factor 2	Translation factors [BR:ko03012]	Translation
alt76_01150	lysyl-tRNA synthetase class II	NA	NA	K04567	KARS, lysS; lysyl-tRNA synthetase, class II	Amino acid related enzymes [BR:ko01007]	Amino acid metabolism
alt76_01151	2-dehydropantoate 2-reductase	NA	NA	K00077	panE, apbA; 2-dehydropantoate 2-reductase	Pantothenate and CoA biosynthesis [PATH:ko00770]	Metabolism of cofactors and vitamins
alt76_01152	tRNA pseudouridine32 synthase/23S rRNA pseudouridine746 synthase	NA	NA	K06177	rluA; tRNA pseudouridine32 synthase / 23S rRNA pseudouridine746 synthase	Ribosome biogenesis [BR:ko03009]	Translation
alt76_01153	HPt (histidine-containing phosphotransfer) domain-containing protein	NA	NA	NA	NA	NA	NA
alt76_01154	zinc protease	NA	NA	K07263	pqqL; zinc protease	Peptidases [BR:ko01002]	Enzyme families	MER0231037	subfamily M28D unassigned peptidases	8.2e-131
alt76_01155	glutamate-cysteine ligase	NA	NA	K01919	gshA; glutamate--cysteine ligase	Cysteine and methionine metabolism [PATH:ko00270]	Amino acid metabolism
alt76_01156	hypothetical protein	NA	NA	NA	NA	NA	NA
alt76_01157	hypothetical protein	NA	NA	NA	NA	NA	NA
alt76_01158	hypothetical protein	NA	NA	NA	NA	NA	NA
alt76_01159	HlyD family secretion protein	NA	NA	NA	NA	NA	NA
alt76_01160	putative ABC transport system ATP-binding protein	NA	NA	K02003	ABC.CD.A; putative ABC transport system ATP-binding protein	Transporters [BR:ko02000]	Membrane transport
alt76_01161	putative ABC transport system permease protein	NA	NA	NA	NA	NA	NA
alt76_01162	putative ABC transport system permease protein	NA	NA	NA	NA	NA	NA
alt76_01163	DNA-binding NtrC family response regulator	NA	NA	K11384	algB; two-component system, NtrC family, response regulator AlgB	Two-component system [BR:ko02022]	Signal transduction
alt76_01164	histidine kinase/DNA gyrase B/HSP90-like ATPase	NA	NA	NA	NA	NA	NA
alt76_01165	uncharacterized protein DUF3149	NA	NA	NA	NA	NA	NA
alt76_01166	DNA-nicking Smr family endonuclease	NA	NA	NA	NA	NA	NA
alt76_01167	[LSU ribosomal protein L3P]-glutamine N5-methyltransferase	NA	NA	K07320	prmB; ribosomal protein L3 glutamine methyltransferase	Ribosome biogenesis [BR:ko03009]	Translation
alt76_01168	chorismate synthase	NA	NA	K01736	aroC; chorismate synthase	Phenylalanine, tyrosine and tryptophan biosynthesis [PATH:ko00400]	Amino acid metabolism
alt76_01169	PPP family 3-phenylpropionic acid transporter	NA	NA	K05820	hcaT; MFS transporter, PPP family, 3-phenylpropionic acid transporter	Transporters [BR:ko02000]	Membrane transport
alt76_01170	hypothetical protein	NA	NA	NA	NA	NA	NA
alt76_01171	spore cortex formation protein SpoVR/YcgB (stage V sporulation)	NA	NA	NA	NA	NA	NA
alt76_01172	hypothetical protein	NA	NA	K09786	K09786; uncharacterized protein	Function unknown	Poorly characterized
alt76_01173	putative serine protein kinase PrkA	NA	NA	K07180	prkA; serine protein kinase	Signal transduction mechanisms	Cellular processes and signaling
alt76_01174	Fe-Mn family superoxide dismutase	NA	NA	K04564	SOD2; superoxide dismutase, Fe-Mn family	FoxO signaling pathway [PATH:ko04068]	Signal transduction
alt76_01175	monothiol glutaredoxin	NA	NA	K07390	grxD, GLRX5; monothiol glutaredoxin	Chaperones and folding catalysts [BR:ko03110]	Folding, sorting and degradation
alt76_01176	iron complex outermembrane receptor protein	NA	NA	NA	NA	NA	NA
alt76_01177	RNA polymerase sigma-70 factor (ECF subfamily)	NA	NA	K03088	SIG3.2, rpoE; RNA polymerase sigma-70 factor, ECF subfamily	Transcription machinery [BR:ko03021]	Transcription
alt76_01178	FecR family protein	NA	NA	K07165	fecR; transmembrane sensor	Signal transduction mechanisms	Cellular processes and signaling
alt76_01179	iron complex outermembrane receptor protein	NA	NA	NA	NA	NA	NA
alt76_01180	bacterioferritin-associated ferredoxin	NA	NA	NA	NA	NA	NA
alt76_01181	peroxiredoxin (alkyl hydroperoxide reductase subunit C)	NA	NA	K03386	PRDX2_4, ahpC; peroxiredoxin (alkyl hydroperoxide reductase subunit C)	Apoptosis - fly [PATH:ko04214]	Cell growth and death
alt76_01182	RNAse T	NA	NA	K03683	rnt; ribonuclease T	Transfer RNA biogenesis [BR:ko03016]	Translation
alt76_01183	OmpA family protein	NA	NA	K21218	motY; sodium-type flagellar protein MotY	Bacterial motility proteins [BR:ko02035]	Cell motility
alt76_01184	glycerophosphoryl diester phosphodiesterase	NA	NA	K01126	E3.1.4.46, glpQ, ugpQ; glycerophosphoryl diester phosphodiesterase	Glycerophospholipid metabolism [PATH:ko00564]	Lipid metabolism
alt76_01185	lactoylglutathione lyase	NA	NA	K01759	GLO1, gloA; lactoylglutathione lyase	Pyruvate metabolism [PATH:ko00620]	Carbohydrate metabolism
alt76_01187	putative cold-shock DNA-binding protein	NA	NA	K03704	cspA; cold shock protein (beta-ribbon, CspA family)	Transcription factors [BR:ko03000]	Transcription
alt76_01188	diguanylate cyclase (GGDEF)-like protein	NA	NA	NA	NA	NA	NA
alt76_01189	hypothetical protein	NA	NA	NA	NA	NA	NA
alt76_01190	Zn-dependent M28 family amino/carboxypeptidase	NA	NA	K01302	CPQ; carboxypeptidase Q	Peptidases [BR:ko01002]	Enzyme families	MER0247690	trilobed protease	2.5e-152
alt76_01191	dipeptidyl aminopeptidase/acylaminoacyl peptidase	NA	NA	NA	NA	NA	NA	MER0083663	subfamily M28F unassigned peptidases	1.3e-176
alt76_01192	pimeloyl-ACP methyl ester carboxylesterase	NA	NA	NA	NA	NA	NA
alt76_01193	DNA-(apurinic or apyrimidinic site) lyase /endonuclease III	NA	NA	K10773	NTH; endonuclease III	Base excision repair [PATH:ko03410]	Replication and repair
alt76_01194	electron transport complex protein RnfE	NA	NA	K03613	rnfE; electron transport complex protein RnfE	Energy metabolism	Metabolism
alt76_01195	electron transport complex protein RnfG	NA	NA	K03612	rnfG; electron transport complex protein RnfG	Energy metabolism	Metabolism
alt76_01196	electron transport complex protein RnfD	NA	NA	K03614	rnfD; electron transport complex protein RnfD	Energy metabolism	Metabolism
alt76_01197	electron transport complex protein RnfC	NA	NA	K03615	rnfC; electron transport complex protein RnfC	Energy metabolism	Metabolism
alt76_01198	electron transport complex protein RnfB	NA	NA	K03616	rnfB; electron transport complex protein RnfB	Energy metabolism	Metabolism
alt76_01199	electron transport complex protein RnfA	NA	NA	K03617	rnfA; electron transport complex protein RnfA	Energy metabolism	Metabolism
alt76_01202	putative MATE family efflux protein	NA	NA	NA	NA	NA	NA
alt76_01203	excinuclease ABC subunit B	NA	NA	K03702	uvrB; excinuclease ABC subunit B	DNA repair and recombination proteins [BR:ko03400]	Replication and repair
alt76_01204	LysR family transcriptional regulator	NA	NA	NA	NA	NA	NA
alt76_01205	hypothetical protein	NA	NA	NA	NA	NA	NA
alt76_01206	hypothetical protein	NA	NA	NA	NA	NA	NA
alt76_01207	preQ(0) biosynthesis protein QueC	NA	NA	K06920	queC; 7-cyano-7-deazaguanine synthase	Transfer RNA biogenesis [BR:ko03016]	Translation
alt76_01208	7-carboxy-7-deazaguanine synthase	NA	NA	K10026	queE; 7-carboxy-7-deazaguanine synthase	Transfer RNA biogenesis [BR:ko03016]	Translation
alt76_01209	hypothetical protein	NA	NA	NA	NA	NA	NA
alt76_01210	asparagine synthase (glutamine-hydrolysing)	NA	NA	K01953	asnB, ASNS; asparagine synthase (glutamine-hydrolysing)	Peptidases [BR:ko01002]	Enzyme families
alt76_01211	YagE family uncharacterized protein	NA	NA	NA	NA	NA	NA
alt76_01212	Zn-dependent M28 family amino/carboxypeptidase	NA	NA	NA	NA	NA	NA	MER0249873	subfamily M16A unassigned peptidases	3.1e-117
alt76_01213	DUF3025 family protein	NA	NA	NA	NA	NA	NA
alt76_01214	Yip1-like protein	NA	NA	NA	NA	NA	NA
alt76_01215	di/tricarboxylate transporter	NA	NA	NA	NA	NA	NA
alt76_01216	sulfate adenylyltransferase subunit 1	NA	NA	K00955	cysNC; bifunctional enzyme CysN/CysC	Sulfur metabolism [PATH:ko00920]	Energy metabolism
alt76_01217	3'(2'),5'-bisphosphate nucleotidase	NA	NA	K01082	cysQ, MET22, BPNT1; 3'(2'), 5'-bisphosphate nucleotidase	Transfer RNA biogenesis [BR:ko03016]	Translation
alt76_01218	adenylylsulfate kinase	NA	NA	K00860	cysC; adenylylsulfate kinase	Purine metabolism [PATH:ko00230]	Nucleotide metabolism
alt76_01219	sulfate adenylyltransferase subunit 2	NA	NA	K00957	cysD; sulfate adenylyltransferase subunit 2	Sulfur metabolism [PATH:ko00920]	Energy metabolism
alt76_01220	SSS family solute:Na+ symporter	NA	NA	K11928	putP; sodium/proline symporter	Transporters [BR:ko02000]	Membrane transport
alt76_01221	diguanylate cyclase (GGDEF)-like protein	NA	NA	NA	NA	NA	NA
alt76_01222	uncharacterized protein DUF3379	NA	NA	NA	NA	NA	NA
alt76_01223	RNA polymerase RpoE-like sigma-24 subunit	NA	NA	K03088	SIG3.2, rpoE; RNA polymerase sigma-70 factor, ECF subfamily	Transcription machinery [BR:ko03021]	Transcription
alt76_01224	uncharacterized protein (DUF885 family)	NA	NA	NA	NA	NA	NA
alt76_01225	oxygen tolerance protein BatD	NA	NA	NA	NA	NA	NA
alt76_01226	Ca-activated chloride channel family protein	NA	NA	K07114	yfbK; Ca-activated chloride channel homolog	Transporters [BR:ko02000]	Membrane transport
alt76_01227	Ca-activated chloride channel family protein	NA	NA	K07114	yfbK; Ca-activated chloride channel homolog	Transporters [BR:ko02000]	Membrane transport
alt76_01228	uncharacterized protein DUF4381	NA	NA	NA	NA	NA	NA
alt76_01229	uncharacterized protein DUF58	NA	NA	NA	NA	NA	NA
alt76_01230	MoxR-like ATPase	NA	NA	K03924	moxR; MoxR-like ATPase	Energy metabolism	Metabolism
alt76_01231	3-ketoacyl-CoA thiolase	NA	NA	K00632	fadA, fadI; acetyl-CoA acyltransferase	Valine, leucine and isoleucine degradation [PATH:ko00280]	Amino acid metabolism
alt76_01232	short chain enoyl-CoA hydratase /3-hydroxyacyl-CoA dehydrogenase	NA	NA	K01782	fadJ; 3-hydroxyacyl-CoA dehydrogenase / enoyl-CoA hydratase / 3-hydroxybutyryl-CoA epimerase	Benzoate degradation [PATH:ko00362]	Xenobiotics biodegradation and metabolism
alt76_01233	hypothetical protein	NA	NA	NA	NA	NA	NA
alt76_01234	hypothetical protein	NA	NA	NA	NA	NA	NA
alt76_01235	PAS domain S-box-containing protein/diguanylate cyclase (GGDEF)-like protein	NA	NA	NA	NA	NA	NA
alt76_01236	secreted Zn-dependent insulinase-like peptidase	NA	NA	K01408	IDE, ide; insulysin	Alzheimer's disease [PATH:ko05010]	Neurodegenerative diseases	MER0795919	subfamily M20A unassigned peptidases	1.2e-211
alt76_01237	phosphohistidine phosphatase SixA	NA	NA	K08296	sixA; phosphohistidine phosphatase	Others	Metabolism
alt76_01238	hypothetical protein	NA	NA	NA	NA	NA	NA
alt76_01239	Mg2+/Co2+ transporter CorB	NA	NA	NA	NA	NA	NA
alt76_01240	ABC-type uncharacterized transport system permease subunit	NA	NA	NA	NA	NA	NA
alt76_01241	signal recognition particle subunit FFH/SRP54 (srp54)	NA	NA	K03106	SRP54, ffh; signal recognition particle subunit SRP54	Bacterial secretion system [PATH:ko03070]	Membrane transport
alt76_01242	hypothetical protein	NA	NA	NA	NA	NA	NA
alt76_01243	hypothetical protein	NA	NA	NA	NA	NA	NA
alt76_01244	uncharacterized protein DUF3584	NA	NA	NA	NA	NA	NA
alt76_01245	hypothetical protein	NA	NA	NA	NA	NA	NA
alt76_01246	hypothetical protein	NA	NA	NA	NA	NA	NA
alt76_01247	tellurite resistance protein TerB	NA	NA	NA	NA	NA	NA
alt76_01248	sodium/proton antiporter (NhaD family)	NA	NA	NA	NA	NA	NA
alt76_01249	hydrophobe/amphiphile efflux-1 (HAE1) family protein	NA	NA	K03296	TC.HAE1; hydrophobic/amphiphilic exporter-1 (mainly G- bacteria), HAE1 family	Transport	Cellular processes and signaling
alt76_01250	RND family efflux transporter MFP subunit	NA	NA	NA	NA	NA	NA
alt76_01251	ATP-binding cassette subfamily B protein	NA	NA	K06147	ABCB-BAC; ATP-binding cassette, subfamily B, bacterial	Transporters [BR:ko02000]	Membrane transport
alt76_01252	O-acetylhomoserine sulfhydrylase	NA	NA	K01740	metY; O-acetylhomoserine (thiol)-lyase	Cysteine and methionine metabolism [PATH:ko00270]	Amino acid metabolism
alt76_01253	putative protein-disulfide isomerase	NA	NA	K07396	K07396; putative protein-disulfide isomerase	Protein folding and associated processing	Genetic information processing
alt76_01254	glutamate carboxypeptidase	NA	NA	NA	NA	NA	NA	MER0249765	methionyl aminopeptidase 1 ({Escherichia}-type)	4.8e-161
alt76_01255	SSU ribosomal protein S16P	NA	NA	K02959	RP-S16, MRPS16, rpsP; small subunit ribosomal protein S16	Mitochondrial biogenesis [BR:ko03029]	Translation
alt76_01256	16S rRNA processing protein RimM	NA	NA	K02860	rimM; 16S rRNA processing protein RimM	Ribosome biogenesis [BR:ko03009]	Translation
alt76_01257	tRNA (guanine37-N(1)-) methyltransferase	NA	NA	K00554	trmD; tRNA (guanine37-N1)-methyltransferase	Transfer RNA biogenesis [BR:ko03016]	Translation
alt76_01258	LSU ribosomal protein L19P	NA	NA	K02884	RP-L19, MRPL19, rplS; large subunit ribosomal protein L19	Ribosome [BR:ko03011]	Translation
alt76_01259	hypothetical protein	CE1	6e-07	K07017	K07017; uncharacterized protein	Function unknown	Poorly characterized
alt76_01260	hypothetical protein	NA	NA	NA	NA	NA	NA
alt76_01261	uncharacterized membrane protein YeiH	NA	NA	NA	NA	NA	NA
alt76_01262	3-deoxy-D-arabinoheptulosonate-7-phosphate synthase	NA	NA	K01626	E2.5.1.54, aroF, aroG, aroH; 3-deoxy-7-phosphoheptulonate synthase	Quorum sensing [PATH:ko02024]	Cellular community - prokaryotes
alt76_01263	chorismate mutase	NA	NA	K14187	tyrA; chorismate mutase / prephenate dehydrogenase	Novobiocin biosynthesis [PATH:ko00401]	Biosynthesis of other secondary metabolites
alt76_01264	methyl-accepting chemotaxis protein	NA	NA	NA	NA	NA	NA
alt76_01265	chorismate mutase	NA	NA	K14170	pheA; chorismate mutase / prephenate dehydratase	Phenylalanine, tyrosine and tryptophan biosynthesis [PATH:ko00400]	Amino acid metabolism
alt76_01266	response regulator receiver protein	NA	NA	NA	NA	NA	NA
alt76_01267	translation initiation factor 1 (eIF-1/SUI1)	NA	NA	K03113	EIF1, SUI1; translation initiation factor 1	RNA transport [PATH:ko03013]	Translation
alt76_01268	anti-sigma-factor antagonist	NA	NA	NA	NA	NA	NA
alt76_01269	DNA-binding response OmpR family regulator	NA	NA	K20977	hsbR; two-component system, HptB-dependent secretion and biofilm response regulator	Biofilm formation - Pseudomonas aeruginosa [PATH:ko02025]	Cellular community - prokaryotes
alt76_01270	uncharacterized tellurite resistance protein B-like protein	NA	NA	NA	NA	NA	NA
alt76_01271	diguanylate cyclase (GGDEF)-like protein	NA	NA	NA	NA	NA	NA
alt76_01272	EF hand domain-containing protein	NA	NA	NA	NA	NA	NA
alt76_01273	two-component system sensor histidine kinase GlrK	NA	NA	K07711	glrK, qseE; two-component system, NtrC family, sensor histidine kinase GlrK	Protein kinases [BR:ko01001]	Enzyme families
alt76_01274	hypothetical protein	NA	NA	NA	NA	NA	NA
alt76_01275	two component Fis family sigma54 specific transcriptional regulator	NA	NA	K07715	glrR, qseF; two-component system, NtrC family, response regulator GlrR	Quorum sensing [PATH:ko02024]	Cellular community - prokaryotes
alt76_01276	GAF domain-containing protein	NA	NA	NA	NA	NA	NA
alt76_01277	uncharacterized protein YecE (DUF72 family)	NA	NA	NA	NA	NA	NA
alt76_01278	aspartyl-tRNA synthetase	NA	NA	K01876	DARS, aspS; aspartyl-tRNA synthetase	Mitochondrial biogenesis [BR:ko03029]	Translation
alt76_01279	dihydroneopterin triphosphate pyrophosphatase	NA	NA	K08310	nudB, ntpA; dihydroneopterin triphosphate diphosphatase	Folate biosynthesis [PATH:ko00790]	Metabolism of cofactors and vitamins
alt76_01280	Holliday junction endonuclease RuvC	NA	NA	K01159	ruvC; crossover junction endodeoxyribonuclease RuvC	Homologous recombination [PATH:ko03440]	Replication and repair
alt76_01281	Holliday junction DNA helicase subunit RuvA	NA	NA	K03550	ruvA; holliday junction DNA helicase RuvA	Homologous recombination [PATH:ko03440]	Replication and repair
alt76_01282	Holliday junction DNA helicase subunit RuvB	NA	NA	K03551	ruvB; holliday junction DNA helicase RuvB	DNA repair and recombination proteins [BR:ko03400]	Replication and repair
alt76_01283	acyl-CoA thioester hydrolase	NA	NA	K07107	ybgC; acyl-CoA thioester hydrolase	General function prediction only	Poorly characterized
alt76_01284	cell division and transport-associated protein TolQ	NA	NA	K03562	tolQ; biopolymer transport protein TolQ	Transporters [BR:ko02000]	Membrane transport
alt76_01285	cell division and transport-associated protein TolR	NA	NA	K03560	tolR; biopolymer transport protein TolR	Transporters [BR:ko02000]	Membrane transport
alt76_01286	cell division and transport-associated protein TolA	NA	NA	NA	NA	NA	NA
alt76_01287	TolB protein	NA	NA	K03641	tolB; TolB protein	Transporters [BR:ko02000]	Membrane transport
alt76_01288	peptidoglycan-associated lipoprotein	NA	NA	K03640	pal; peptidoglycan-associated lipoprotein	Transporters [BR:ko02000]	Membrane transport
alt76_01289	tol-pal system protein YbgF	NA	NA	NA	NA	NA	NA
alt76_01293	quinolinate synthetase	NA	NA	K03517	nadA; quinolinate synthase	Nicotinate and nicotinamide metabolism [PATH:ko00760]	Metabolism of cofactors and vitamins
alt76_01295	glutaredoxin	NA	NA	NA	NA	NA	NA
alt76_01296	uncharacterized protein YdiU (UPF0061 family)	NA	NA	NA	NA	NA	NA
alt76_01297	diguanylate cyclase (GGDEF)-like protein	NA	NA	NA	NA	NA	NA
alt76_01298	HopJ type III effector protein	NA	NA	NA	NA	NA	NA
alt76_01299	methionine aminopeptidase type I	NA	NA	K01265	map; methionyl aminopeptidase	Peptidases [BR:ko01002]	Enzyme families
alt76_01300	ParD-like antitoxin of type II ParDE toxin-antitoxin system	NA	NA	NA	NA	NA	NA
alt76_01301	predicted DNA-binding transcriptional regulator YafY	NA	NA	NA	NA	NA	NA
alt76_01302	cell division protein FtsZ	NA	NA	NA	NA	NA	NA
alt76_01303	hypothetical protein	NA	NA	NA	NA	NA	NA
alt76_01304	HupE/UreJ protein	NA	NA	NA	NA	NA	NA
alt76_01305	hypothetical protein	NA	NA	NA	NA	NA	NA
alt76_01306	hypothetical protein	NA	NA	NA	NA	NA	NA
alt76_01307	hypothetical protein	NA	NA	NA	NA	NA	NA
alt76_01308	signal transduction histidine kinase	NA	NA	NA	NA	NA	NA
alt76_01309	OPA family glycerol-3-phosphate transporter-like MFS transporter	NA	NA	K02445	glpT; MFS transporter, OPA family, glycerol-3-phosphate transporter	Transporters [BR:ko02000]	Membrane transport
alt76_01310	ketopantoate reductase	NA	NA	K00077	panE, apbA; 2-dehydropantoate 2-reductase	Pantothenate and CoA biosynthesis [PATH:ko00770]	Metabolism of cofactors and vitamins
alt76_01311	hypothetical protein	NA	NA	NA	NA	NA	NA
alt76_01312	hypothetical protein	NA	NA	NA	NA	NA	NA
alt76_01313	hypothetical protein	NA	NA	NA	NA	NA	NA
alt76_01314	hypothetical protein	NA	NA	K06996	K06996; uncharacterized protein	Function unknown	Poorly characterized
alt76_01315	aspartate-semialdehyde dehydrogenase	NA	NA	K00133	asd; aspartate-semialdehyde dehydrogenase	Cysteine and methionine metabolism [PATH:ko00270]	Amino acid metabolism
alt76_01316	short subunit dehydrogenase	NA	NA	NA	NA	NA	NA
alt76_01317	catalase	NA	NA	K03781	katE, CAT, catB, srpA; catalase	Glyoxylate and dicarboxylate metabolism [PATH:ko00630]	Carbohydrate metabolism
alt76_01318	cytochrome b561	NA	NA	NA	NA	NA	NA
alt76_01319	LysR family transcriptional regulator	NA	NA	NA	NA	NA	NA
alt76_01320	NADPH2:quinone reductase	NA	NA	K18980	EO, FaQR; 2-methylene-furan-3-one reductase	Biosynthesis and biodegradation of secondary metabolites	Metabolism
alt76_01321	NADPH:quinone reductase-like Zn-dependent oxidoreductase	NA	NA	NA	NA	NA	NA
alt76_01322	acetoin utilization protein AcuB	NA	NA	NA	NA	NA	NA
alt76_01323	multidrug efflux pump subunit AcrB	NA	NA	NA	NA	NA	NA
alt76_01324	RND family efflux transporter MFP subunit	NA	NA	NA	NA	NA	NA
alt76_01325	TetR family transcriptional regulator	NA	NA	NA	NA	NA	NA
alt76_01326	multidrug efflux pump subunit AcrB	NA	NA	NA	NA	NA	NA
alt76_01327	RND family efflux transporter MFP subunit	NA	NA	NA	NA	NA	NA
alt76_01328	diguanylate cyclase (GGDEF)-like protein	NA	NA	K21085	yedQ; diguanylate cyclase	Biofilm formation - Escherichia coli [PATH:ko02026]	Cellular community - prokaryotes
alt76_01329	hypothetical protein	NA	NA	K09857	K09857; uncharacterized protein	Function unknown	Poorly characterized
alt76_01330	paraquat-inducible protein B	NA	NA	K06192	pqiB; paraquat-inducible protein B	General function prediction only	Poorly characterized
alt76_01331	paraquat-inducible protein A	NA	NA	K03808	pqiA; paraquat-inducible protein A	General function prediction only	Poorly characterized
alt76_01332	hypothetical protein	NA	NA	NA	NA	NA	NA
alt76_01333	asparaginyl-tRNA synthetase	NA	NA	K01893	NARS, asnS; asparaginyl-tRNA synthetase	Transfer RNA biogenesis [BR:ko03016]	Translation
alt76_01334	hypothetical protein	NA	NA	NA	NA	NA	NA
alt76_01335	cation:H+ antiporter	NA	NA	K07301	yrbG; cation:H+ antiporter	Transporters [BR:ko02000]	Membrane transport
alt76_01336	glutathione synthase/RimK-type ligase-like ATP-grasp enzyme	NA	NA	NA	NA	NA	NA
alt76_01337	ribosomal protein S18 acetylase RimI-like enzyme	NA	NA	NA	NA	NA	NA
alt76_01338	hypothetical protein	NA	NA	NA	NA	NA	NA
alt76_01339	DUF2937 family protein	NA	NA	NA	NA	NA	NA
alt76_01340	adenosylmethionine-8-amino-7-oxononanoate aminotransferase	NA	NA	K00833	bioA; adenosylmethionine---8-amino-7-oxononanoate aminotransferase	Amino acid related enzymes [BR:ko01007]	Amino acid metabolism
alt76_01341	biotin synthase	NA	NA	K01012	bioB; biotin synthase	Biotin metabolism [PATH:ko00780]	Metabolism of cofactors and vitamins
alt76_01342	8-amino-7-oxononanoate synthase	NA	NA	K00652	bioF; 8-amino-7-oxononanoate synthase	Biotin metabolism [PATH:ko00780]	Metabolism of cofactors and vitamins
alt76_01343	pimeloyl-CoA biosynthesis protein BioC	NA	NA	K02169	bioC; malonyl-CoA O-methyltransferase	Biotin metabolism [PATH:ko00780]	Metabolism of cofactors and vitamins
alt76_01344	dethiobiotin synthetase	NA	NA	K01935	bioD; dethiobiotin synthetase	Biotin metabolism [PATH:ko00780]	Metabolism of cofactors and vitamins	MER0249069	dipeptidase E	4.6e-151
alt76_01345	alpha-aspartyl dipeptidase	NA	NA	K05995	pepE; dipeptidase E	Peptidases [BR:ko01002]	Enzyme families	MER0097197	family M14 non-peptidase homologues	7.2e-109
alt76_01346	protein tyrosine phosphatase	NA	NA	K01104	E3.1.3.48; protein-tyrosine phosphatase	Signal transduction mechanisms	Cellular processes and signaling
alt76_01347	iron complex transport system permease protein	NA	NA	K02015	ABC.FEV.P; iron complex transport system permease protein	Transporters [BR:ko02000]	Membrane transport
alt76_01348	vitamin B12 transport system ATP-binding protein	NA	NA	K02013	ABC.FEV.A; iron complex transport system ATP-binding protein	ABC transporters [PATH:ko02010]	Membrane transport
alt76_01349	3-deoxy-D-arabinoheptulosonate-7-phosphate synthase	NA	NA	K01626	E2.5.1.54, aroF, aroG, aroH; 3-deoxy-7-phosphoheptulonate synthase	Quorum sensing [PATH:ko02024]	Cellular community - prokaryotes
alt76_01350	hypothetical protein	NA	NA	NA	NA	NA	NA
alt76_01351	hypothetical protein	NA	NA	K09954	K09954; uncharacterized protein	Function unknown	Poorly characterized
alt76_01352	ATP-binding cassette subfamily B protein	NA	NA	K06147	ABCB-BAC; ATP-binding cassette, subfamily B, bacterial	Transporters [BR:ko02000]	Membrane transport
alt76_01353	cyclic pyranopterin monophosphate synthase subunit MoaA	NA	NA	K03639	moaA, CNX2; GTP 3',8-cyclase	Sulfur relay system [PATH:ko04122]	Folding, sorting and degradation
alt76_01354	RimJ/RimL family protein N-acetyltransferase	NA	NA	NA	NA	NA	NA
alt76_01355	response regulator receiver protein	NA	NA	NA	NA	NA	NA
alt76_01359	glutamyl-tRNA synthetase	NA	NA	K01885	EARS, gltX; glutamyl-tRNA synthetase	Aminoacyl-tRNA biosynthesis [PATH:ko00970]	Translation
alt76_01365	succinylglutamate desuccinylase/aspartoacylase family protein	NA	NA	NA	NA	NA	NA	MER0248203	subfamily M15B non-peptidase homologues	1.5e-103
alt76_01366	hypothetical protein	NA	NA	NA	NA	NA	NA
alt76_01367	tRNA-U20a,U20b-dihydrouridine synthase	NA	NA	K05541	dusC; tRNA-dihydrouridine synthase C	Transfer RNA biogenesis [BR:ko03016]	Translation
alt76_01368	hypothetical protein	NA	NA	NA	NA	NA	NA
alt76_01369	hypothetical protein	NA	NA	NA	NA	NA	NA
alt76_01370	acyl-CoA thioesterase-1	NA	NA	K10804	tesA; acyl-CoA thioesterase I	Biosynthesis of unsaturated fatty acids [PATH:ko01040]	Lipid metabolism
alt76_01371	putative ABC transport system ATP-binding protein	NA	NA	K02003	ABC.CD.A; putative ABC transport system ATP-binding protein	Transporters [BR:ko02000]	Membrane transport
alt76_01372	putative ABC transport system permease protein	NA	NA	K02004	ABC.CD.P; putative ABC transport system permease protein	Transporters [BR:ko02000]	Membrane transport
alt76_01373	hypothetical protein	NA	NA	K07071	K07071; uncharacterized protein	Function unknown	Poorly characterized
alt76_01374	D-erythro-7,8-dihydroneopterin triphosphate epimerase	NA	NA	K07589	folX; D-erythro-7,8-dihydroneopterin triphosphate epimerase	Folate biosynthesis [PATH:ko00790]	Metabolism of cofactors and vitamins
alt76_01375	predicted PurR-regulated permease PerM	NA	NA	K11744	tqsA; AI-2 transport protein TqsA	Membrane and intracellular structural molecules	Cellular processes and signaling
alt76_01376	two-component system sensor histidine kinase PhoQ	NA	NA	K07637	phoQ; two-component system, OmpR family, sensor histidine kinase PhoQ	Cationic antimicrobial peptide (CAMP) resistance [PATH:ko01503]	Drug resistance
alt76_01377	winged helix family two component transcriptional regulator	NA	NA	K02483	K02483; two-component system, OmpR family, response regulator	Two-component system [BR:ko02022]	Signal transduction
alt76_01378	YpeB-like protein with putative protease inhibitory function	NA	NA	NA	NA	NA	NA
alt76_01379	pyridoxamine 5'-phosphate oxidase like protein	NA	NA	NA	NA	NA	NA
alt76_01380	pyridoxamine 5'-phosphate oxidase like protein	NA	NA	NA	NA	NA	NA
alt76_01381	hypothetical protein	NA	NA	K09780	K09780; uncharacterized protein	Function unknown	Poorly characterized
alt76_01382	tryptophan synthase alpha chain	NA	NA	K01695	trpA; tryptophan synthase alpha chain	Phenylalanine, tyrosine and tryptophan biosynthesis [PATH:ko00400]	Amino acid metabolism
alt76_01383	tryptophan synthase beta chain	NA	NA	K01696	trpB; tryptophan synthase beta chain	Glycine, serine and threonine metabolism [PATH:ko00260]	Amino acid metabolism
alt76_01384	indole-3-glycerol phosphate synthase	NA	NA	K13498	trpCF; indole-3-glycerol phosphate synthase / phosphoribosylanthranilate isomerase	Phenylalanine, tyrosine and tryptophan biosynthesis [PATH:ko00400]	Amino acid metabolism
alt76_01385	anthranilate phosphoribosyltransferase	NA	NA	K00766	trpD; anthranilate phosphoribosyltransferase	Phenylalanine, tyrosine and tryptophan biosynthesis [PATH:ko00400]	Amino acid metabolism
alt76_01386	anthranilate synthase component II	NA	NA	K01658	trpG; anthranilate synthase component II	Quorum sensing [PATH:ko02024]	Cellular community - prokaryotes
alt76_01387	anthranilate synthase component I	NA	NA	K01657	trpE; anthranilate synthase component I	Phenazine biosynthesis [PATH:ko00405]	Biosynthesis of other secondary metabolites
alt76_01388	hypothetical protein	NA	NA	K07053	E3.1.3.97; 3',5'-nucleoside bisphosphate phosphatase	Nucleotide metabolism	Metabolism
alt76_01389	translation factor SUA5	NA	NA	NA	NA	NA	NA
alt76_01390	condensin subunit ScpA	NA	NA	K05896	scpA; segregation and condensation protein A	Chromosome and associated proteins [BR:ko03036]	Replication and repair
alt76_01391	condensin subunit ScpB	NA	NA	K06024	scpB; segregation and condensation protein B	Chromosome and associated proteins [BR:ko03036]	Replication and repair
alt76_01392	ribosomal large subunit pseudouridine synthase B	NA	NA	K06178	rluB; 23S rRNA pseudouridine2605 synthase	Ribosome biogenesis [BR:ko03009]	Translation
alt76_01393	hypothetical protein	NA	NA	NA	NA	NA	NA
alt76_01394	2,5-diketo-D-gluconate reductase B	NA	NA	K06222	dkgB; 2,5-diketo-D-gluconate reductase B	Others	Metabolism
alt76_01395	maltose O-acetyltransferase	NA	NA	K00661	maa; maltose O-acetyltransferase	Others	Metabolism
alt76_01396	hypothetical protein	NA	NA	NA	NA	NA	NA
alt76_01397	arsenate reductase	NA	NA	K00537	ARSC1, arsC; arsenate reductase	Others	Metabolism
alt76_01398	uncharacterized membrane-anchored protein YjiN (DUF445 family)	NA	NA	NA	NA	NA	NA
alt76_01399	thiopurine S-methyltransferase	NA	NA	K00569	TPMT, tpmT; thiopurine S-methyltransferase	Drug metabolism - other enzymes [PATH:ko00983]	Xenobiotics biodegradation and metabolism
alt76_01400	Beta-barrel assembly machine subunit BamE	NA	NA	K06186	bamE, smpA; outer membrane protein assembly factor BamE	Transporters [BR:ko02000]	Membrane transport
alt76_01401	DNA replication and repair protein RecN	NA	NA	K03631	recN; DNA repair protein RecN (Recombination protein N)	DNA repair and recombination proteins [BR:ko03400]	Replication and repair
alt76_01402	NAD+ kinase	NA	NA	K00858	ppnK, NADK; NAD+ kinase	Nicotinate and nicotinamide metabolism [PATH:ko00760]	Metabolism of cofactors and vitamins
alt76_01403	3-hydroxybutyrate dehydrogenase	NA	NA	K00019	E1.1.1.30, bdh; 3-hydroxybutyrate dehydrogenase	Butanoate metabolism [PATH:ko00650]	Carbohydrate metabolism
alt76_01404	esterase/PHB depolymerase	NA	NA	NA	NA	NA	NA
alt76_01405	homoserine O-acetyltransferase	NA	NA	K00641	metX; homoserine O-acetyltransferase	Cysteine and methionine metabolism [PATH:ko00270]	Amino acid metabolism
alt76_01406	H+/gluconate symporter-like permease	NA	NA	NA	NA	NA	NA
alt76_01407	iron complex outermembrane receptor protein	NA	NA	NA	NA	NA	NA
alt76_01408	LuxR family two component transcriptional regulator	NA	NA	NA	NA	NA	NA
alt76_01409	Na+/proline symporter	NA	NA	NA	NA	NA	NA
alt76_01410	molecular chaperone GrpE	NA	NA	K03687	GRPE; molecular chaperone GrpE	Mitochondrial biogenesis [BR:ko03029]	Translation
alt76_01411	molecular chaperone DnaK	NA	NA	K04043	dnaK, HSPA9; molecular chaperone DnaK	Chaperones and folding catalysts [BR:ko03110]	Folding, sorting and degradation
alt76_01412	molecular chaperone DnaJ	NA	NA	K03686	dnaJ; molecular chaperone DnaJ	Mitochondrial biogenesis [BR:ko03029]	Translation
alt76_01413	cytochrome c556	NA	NA	NA	NA	NA	NA
alt76_01414	PAS domain S-box-containing protein	NA	NA	NA	NA	NA	NA
alt76_01415	propionyl-CoA synthetase	NA	NA	K01908	prpE; propionyl-CoA synthetase	Propanoate metabolism [PATH:ko00640]	Carbohydrate metabolism
alt76_01416	cytochrome b	NA	NA	NA	NA	NA	NA
alt76_01417	dihydrodipicolinate reductase	NA	NA	K00215	dapB; 4-hydroxy-tetrahydrodipicolinate reductase	Monobactam biosynthesis [PATH:ko00261]	Biosynthesis of other secondary metabolites
alt76_01418	carbamoyl-phosphate synthase small subunit	NA	NA	K01956	carA, CPA1; carbamoyl-phosphate synthase small subunit	Alanine, aspartate and glutamate metabolism [PATH:ko00250]	Amino acid metabolism
alt76_01419	carbamoyl-phosphate synthase large subunit	NA	NA	K01955	carB, CPA2; carbamoyl-phosphate synthase large subunit	Alanine, aspartate and glutamate metabolism [PATH:ko00250]	Amino acid metabolism
alt76_01420	transcription elongation factor GreA	NA	NA	K03624	greA; transcription elongation factor GreA	Transcription machinery [BR:ko03021]	Transcription
alt76_01421	methyl-accepting chemotaxis protein	NA	NA	NA	NA	NA	NA
alt76_01422	hypothetical protein	NA	NA	NA	NA	NA	NA
alt76_01423	hypothetical protein	NA	NA	NA	NA	NA	NA
alt76_01424	hypothetical protein	NA	NA	NA	NA	NA	NA
alt76_01425	NUDIX domain-containing protein	NA	NA	K01515	nudF; ADP-ribose pyrophosphatase	Purine metabolism [PATH:ko00230]	Nucleotide metabolism
alt76_01426	uncharacterized protein DUF3224	NA	NA	NA	NA	NA	NA
alt76_01427	molecular chaperone IbpA	NA	NA	K04080	ibpA; molecular chaperone IbpA	Chaperones and folding catalysts [BR:ko03110]	Folding, sorting and degradation
alt76_01428	acetate kinase	NA	NA	K00925	ackA; acetate kinase	Pyruvate metabolism [PATH:ko00620]	Carbohydrate metabolism
alt76_01429	phosphate acetyltransferase	NA	NA	K13788	pta; phosphate acetyltransferase	Propanoate metabolism [PATH:ko00640]	Carbohydrate metabolism
alt76_01430	apolipoprotein N-acyltransferase	NA	NA	K03820	lnt; apolipoprotein N-acyltransferase	Membrane and intracellular structural molecules	Cellular processes and signaling
alt76_01431	magnesium and cobalt transporter	NA	NA	K06189	corC; magnesium and cobalt transporter	Transporters [BR:ko02000]	Membrane transport
alt76_01432	probable rRNA maturation factor	NA	NA	K07042	ybeY, yqfG; probable rRNA maturation factor	Ribosome biogenesis [BR:ko03009]	Translation
alt76_01433	phosphate starvation-inducible PhoH-like protein	NA	NA	K06217	phoH, phoL; phosphate starvation-inducible protein PhoH and related proteins	Signal transduction mechanisms	Cellular processes and signaling
alt76_01434	tRNA-i(6)A37 thiotransferase enzyme MiaB	NA	NA	K06168	miaB; tRNA-2-methylthio-N6-dimethylallyladenosine synthase	Transfer RNA biogenesis [BR:ko03016]	Translation
alt76_01435	2-octaprenyl-3-methyl-6-methoxy-1,4-benzoquinol hydroxylase	NA	NA	K03184	ubiF; 2-octaprenyl-3-methyl-6-methoxy-1,4-benzoquinol hydroxylase	Ubiquinone and other terpenoid-quinone biosynthesis [PATH:ko00130]	Metabolism of cofactors and vitamins
alt76_01436	hypothetical protein	NA	NA	NA	NA	NA	NA
alt76_01437	TetR family transcriptional regulator	NA	NA	NA	NA	NA	NA
alt76_01438	AhpD family alkylhydroperoxidase	NA	NA	NA	NA	NA	NA
alt76_01439	hypothetical protein	NA	NA	NA	NA	NA	NA
alt76_01440	flavin reductase (DIM6/NTAB) family NADH-FMN oxidoreductase RutF	NA	NA	NA	NA	NA	NA
alt76_01441	AGCS family alanine or glycine:cation symporter	NA	NA	K03310	TC.AGCS; alanine or glycine:cation symporter, AGCS family	Transport	Cellular processes and signaling
alt76_01446	peptidylprolyl isomerase	NA	NA	K01802	E5.2.1.8; peptidylprolyl isomerase	Protein folding and associated processing	Genetic information processing
alt76_01447	hypothetical protein	NA	NA	K06942	ychF; ribosome-binding ATPase	Ribosome biogenesis [BR:ko03009]	Translation
alt76_01448	peptidyl-tRNA hydrolase	NA	NA	K01056	PTH1, pth, spoVC; peptidyl-tRNA hydrolase, PTH1 family	Translation factors [BR:ko03012]	Translation
alt76_01449	LSU ribosomal protein L25P	NA	NA	K02897	RP-L25, rplY; large subunit ribosomal protein L25	Ribosome [BR:ko03011]	Translation
alt76_01450	uncharacterized zinc-type alcohol dehydrogenase-like protein	NA	NA	K12957	yjgB; uncharacterized zinc-type alcohol dehydrogenase-like protein	General function prediction only	Poorly characterized
alt76_01451	hypothetical protein	NA	NA	NA	NA	NA	NA
alt76_01452	PAS domain S-box-containing protein/diguanylate cyclase (GGDEF)-like protein	NA	NA	NA	NA	NA	NA
alt76_01453	ribose-phosphate pyrophosphokinase	NA	NA	K00948	PRPS, prsA; ribose-phosphate pyrophosphokinase	Pentose phosphate pathway [PATH:ko00030]	Carbohydrate metabolism
alt76_01455	4-diphosphocytidyl-2-C-methyl-D-erythritol kinase	NA	NA	K00919	ispE; 4-diphosphocytidyl-2-C-methyl-D-erythritol kinase	Terpenoid backbone biosynthesis [PATH:ko00900]	Metabolism of terpenoids and polyketides
alt76_01456	outer membrane lipoprotein LolB	NA	NA	K02494	lolB; outer membrane lipoprotein LolB	Membrane and intracellular structural molecules	Cellular processes and signaling
alt76_01457	glutamyl-tRNA reductase	NA	NA	K02492	hemA; glutamyl-tRNA reductase	Porphyrin and chlorophyll metabolism [PATH:ko00860]	Metabolism of cofactors and vitamins
alt76_01458	peptide chain release factor 1 (bRF-1)	NA	NA	K02835	prfA, MTRF1, MRF1; peptide chain release factor 1	Translation factors [BR:ko03012]	Translation
alt76_01459	[protein release factor]-glutamine N5-methyltransferase	NA	NA	K02493	hemK, prmC, HEMK; release factor glutamine methyltransferase	Translation factors [BR:ko03012]	Translation
alt76_01460	response regulator receiver domain-containing protein	NA	NA	NA	NA	NA	NA
alt76_01461	uncharacterized membrane protein SirB2	NA	NA	NA	NA	NA	NA
alt76_01462	2-dehydro-3-deoxyphosphooctonate aldolase (KDO 8-P synthase)	NA	NA	K01627	kdsA; 2-dehydro-3-deoxyphosphooctonate aldolase (KDO 8-P synthase)	Lipopolysaccharide biosynthesis [PATH:ko00540]	Glycan biosynthesis and metabolism
alt76_01463	hypothetical protein	NA	NA	NA	NA	NA	NA
alt76_01464	LysR family transcriptional regulator	NA	NA	K03566	gcvA; LysR family transcriptional regulator, glycine cleavage system transcriptional activator	Transcription factors [BR:ko03000]	Transcription
alt76_01465	hypothetical protein	NA	NA	K07020	K07020; uncharacterized protein	Function unknown	Poorly characterized
alt76_01466	uncharacterized membrane protein YgdD (TMEM256/DUF423 family)	NA	NA	NA	NA	NA	NA
alt76_01467	23S rRNA (cytidine2498-2'-O)-methyltransferase	NA	NA	K06968	rlmM; 23S rRNA (cytidine2498-2'-O)-methyltransferase	Ribosome biogenesis [BR:ko03009]	Translation
alt76_01468	translation elongation factor 2 (EF-2/EF-G)	NA	NA	K02355	fusA, GFM, EFG; elongation factor G	Mitochondrial biogenesis [BR:ko03029]	Translation
alt76_01469	cyanate lyase	NA	NA	K01725	cynS; cyanate lyase	Nitrogen metabolism [PATH:ko00910]	Energy metabolism
alt76_01470	serine/threonine protein kinase	NA	NA	NA	NA	NA	NA
alt76_01471	formate/nitrite transporter	NA	NA	K06212	focA; formate transporter	Transporters [BR:ko02000]	Membrane transport
alt76_01472	transglutaminase-like putative cysteine protease	NA	NA	K22452	NA	NA	NA
alt76_01473	uncharacterized protein (DUF58 family)	NA	NA	NA	NA	NA	NA
alt76_01474	MoxR-like ATPase	NA	NA	K03924	moxR; MoxR-like ATPase	Energy metabolism	Metabolism
alt76_01475	negative regulator of replication initiation SeqA	NA	NA	K03645	seqA; negative modulator of initiation of replication	Chromosome and associated proteins [BR:ko03036]	Replication and repair
alt76_01476	phosphoglucomutase	NA	NA	K01835	pgm; phosphoglucomutase	Streptomycin biosynthesis [PATH:ko00521]	Biosynthesis of other secondary metabolites
alt76_01477	starch phosphorylase	GT35	2.2e-283	K00688	PYG, glgP; glycogen phosphorylase	Insulin signaling pathway [PATH:ko04910]	Endocrine system
alt76_01478	diguanylate cyclase (GGDEF)-like protein	NA	NA	NA	NA	NA	NA
alt76_01479	succinylglutamate desuccinylase	NA	NA	K05526	astE; succinylglutamate desuccinylase	Arginine and proline metabolism [PATH:ko00330]	Amino acid metabolism
alt76_01480	diadenosine tetraphosphate (Ap4A) HIT family hydrolase	NA	NA	NA	NA	NA	NA
alt76_01481	uncharacterized protein YbjQ (UPF0145 family)	NA	NA	NA	NA	NA	NA
alt76_01482	DUF2897 family protein	NA	NA	NA	NA	NA	NA
alt76_01483	D-alanyl-D-alanine carboxypeptidase-like protein	NA	NA	NA	NA	NA	NA	MER0248202	DapE peptidase	1.6e-257
alt76_01484	succinyldiaminopimelate desuccinylase	NA	NA	K01439	dapE; succinyl-diaminopimelate desuccinylase	Lysine biosynthesis [PATH:ko00300]	Amino acid metabolism	MER0097172	family M79 unassigned peptidases	2.2e-46
alt76_01485	Spx/MgsR family transcriptional regulator	NA	NA	NA	NA	NA	NA
alt76_01486	PTS system glucose-specific IIA component	NA	NA	K02755	PTS-Bgl-EIIA, bglF, bglP; PTS system, beta-glucoside-specific IIA component	Phosphotransferase system (PTS) [PATH:ko02060]	Membrane transport
alt76_01487	hypothetical protein	NA	NA	NA	NA	NA	NA
alt76_01488	hypothetical protein	NA	NA	NA	NA	NA	NA
alt76_01489	4-hydroxyphenylpyruvate dioxygenase	NA	NA	K00457	HPD, hppD; 4-hydroxyphenylpyruvate dioxygenase	Ubiquinone and other terpenoid-quinone biosynthesis [PATH:ko00130]	Metabolism of cofactors and vitamins
alt76_01490	homogentisate 1,2-dioxygenase	NA	NA	K00451	HGD, hmgA; homogentisate 1,2-dioxygenase	Styrene degradation [PATH:ko00643]	Xenobiotics biodegradation and metabolism
alt76_01491	hypothetical protein	NA	NA	NA	NA	NA	NA
alt76_01493	diguanylate cyclase (GGDEF)-like protein	NA	NA	NA	NA	NA	NA
alt76_01494	PAS domain S-box-containing protein/diguanylate cyclase (GGDEF)-like protein	NA	NA	NA	NA	NA	NA
alt76_01495	uncharacterized membrane protein	NA	NA	NA	NA	NA	NA
alt76_01496	guanine deaminase	NA	NA	K01487	E3.5.4.3, guaD; guanine deaminase	Purine metabolism [PATH:ko00230]	Nucleotide metabolism
alt76_01497	5-hydroxyisourate hydrolase	NA	NA	K07127	uraH, pucM, hiuH; 5-hydroxyisourate hydrolase	Transporters [BR:ko02000]	Membrane transport
alt76_01498	2-oxo-4-hydroxy-4-carboxy-5-ureidoimidazoline decarboxylase	NA	NA	K13484	TTHL; 5-hydroxyisourate hydrolase / 2-oxo-4-hydroxy-4-carboxy-5-ureidoimidazoline decarboxylase	Purine metabolism [PATH:ko00230]	Nucleotide metabolism
alt76_01499	molybdenum cofactor sulfurylase	NA	NA	K07402	xdhC; xanthine dehydrogenase accessory factor	Protein folding and associated processing	Genetic information processing
alt76_01500	xanthine dehydrogenase molybdenum binding subunit apoprotein	NA	NA	K13482	xdhB; xanthine dehydrogenase large subunit	Purine metabolism [PATH:ko00230]	Nucleotide metabolism
alt76_01501	xanthine dehydrogenase small subunit	NA	NA	K13481	xdhA; xanthine dehydrogenase small subunit	Purine metabolism [PATH:ko00230]	Nucleotide metabolism
alt76_01502	TetR family transcriptional regulator	NA	NA	K09017	rutR; TetR/AcrR family transcriptional regulator	Transcription factors [BR:ko03000]	Transcription
alt76_01503	putative urate catabolism protein	NA	NA	NA	NA	NA	NA
alt76_01504	hypothetical protein	NA	NA	NA	NA	NA	NA
alt76_01505	AGZA family xanthine/uracil permease-like MFS transporter	NA	NA	K06901	pbuG; putative MFS transporter, AGZA family, xanthine/uracil permease	Transporters [BR:ko02000]	Membrane transport
alt76_01506	adenosine deaminase	NA	NA	K21053	ade; adenine deaminase	Purine metabolism [PATH:ko00230]	Nucleotide metabolism
alt76_01507	Hpt domain-containing protein	NA	NA	NA	NA	NA	NA
alt76_01508	hypothetical protein	NA	NA	NA	NA	NA	NA
alt76_01509	PAS domain S-box-containing protein/diguanylate cyclase (GGDEF)-like protein	NA	NA	NA	NA	NA	NA
alt76_01510	response regulator receiver modulated diguanylate cyclase	NA	NA	K18444	rrp1; two-component system, glycerol uptake and utilization response regulator	Two-component system [PATH:ko02020]	Signal transduction
alt76_01511	signal transduction histidine kinase	NA	NA	NA	NA	NA	NA
alt76_01512	purine nucleoside permease	NA	NA	NA	NA	NA	NA
alt76_01513	iron complex outermembrane receptor protein	NA	NA	NA	NA	NA	NA
alt76_01514	xanthine permease XanP	NA	NA	K16345	xanP; xanthine permease XanP	Transporters [BR:ko02000]	Membrane transport
alt76_01515	adenosine deaminase	NA	NA	K19572	CECR1, ADA2; adenosine deaminase CECR1	Purine metabolism [PATH:ko00230]	Nucleotide metabolism
alt76_01516	uncharacterized protein DUF861	NA	NA	NA	NA	NA	NA
alt76_01517	allantoate deiminase	NA	NA	K02083	allC; allantoate deiminase	Peptidases [BR:ko01002]	Enzyme families
alt76_01518	(S)-ureidoglycine-glyoxylate aminotransferase	NA	NA	K00839	pucG; (S)-ureidoglycine---glyoxylate transaminase	Purine metabolism [PATH:ko00230]	Nucleotide metabolism
alt76_01519	uncharacterized membrane protein YfcA	NA	NA	NA	NA	NA	NA
alt76_01520	gamma-glutamyltranspeptidase/glutathione hydrolase	NA	NA	NA	NA	NA	NA
alt76_01521	amidase	NA	NA	K01426	E3.5.1.4, amiE; amidase	Phenylalanine metabolism [PATH:ko00360]	Amino acid metabolism
alt76_01522	uncharacterized protein (DUF924 family)	NA	NA	NA	NA	NA	NA
alt76_01523	RpiR family transcriptional regulator	NA	NA	NA	NA	NA	NA
alt76_01524	CAAX prenyl protease-like protein	NA	NA	NA	NA	NA	NA
alt76_01525	mechanosensitive ion channel-like protein	NA	NA	K05802	mscK, kefA, aefA; potassium-dependent mechanosensitive channel	Transporters [BR:ko02000]	Membrane transport
alt76_01526	DUF3080 family protein	NA	NA	NA	NA	NA	NA
alt76_01527	pteridine reductase	NA	NA	K00034	gdh; glucose 1-dehydrogenase	Pentose phosphate pathway [PATH:ko00030]	Carbohydrate metabolism
alt76_01528	Ser-tRNA(Thr) hydrolase /threonyl-tRNA synthetase	NA	NA	K01868	TARS, thrS; threonyl-tRNA synthetase	Amino acid related enzymes [BR:ko01007]	Amino acid metabolism
alt76_01529	translation initiation factor 3 (bIF-3)	NA	NA	K02520	infC, MTIF3; translation initiation factor IF-3	Translation factors [BR:ko03012]	Translation
alt76_01530	LSU ribosomal protein L35P	NA	NA	K02916	RP-L35, MRPL35, rpmI; large subunit ribosomal protein L35	Ribosome [BR:ko03011]	Translation
alt76_01531	LSU ribosomal protein L20P	NA	NA	K02887	RP-L20, MRPL20, rplT; large subunit ribosomal protein L20	Ribosome [PATH:ko03010]	Translation
alt76_01532	peptidoglycan/LPS O-acetylase OafA/YrhL	NA	NA	NA	NA	NA	NA
alt76_01533	putative colanic acid biosynthesis UDP-glucose lipid carrier transferase	NA	NA	K03606	wcaJ; putative colanic acid biosysnthesis UDP-glucose lipid carrier transferase	Biofilm formation - Vibrio cholerae [PATH:ko05111]	Cellular community - prokaryotes
alt76_01534	putative beta-barrel porin 2	NA	NA	NA	NA	NA	NA
alt76_01535	polysaccharide export outer membrane protein	NA	NA	K01991	ABC-2.OM, wza; polysaccharide biosynthesis/export protein	Biofilm formation - Escherichia coli [PATH:ko02026]	Cellular community - prokaryotes
alt76_01536	capsular exopolysaccharide synthesis family protein	NA	NA	K16554	exoP, vpsO; polysaccharide biosynthesis transport protein	Transporters [BR:ko02000]	Membrane transport
alt76_01537	protein-tyrosine phosphatase	NA	NA	K01104	E3.1.3.48; protein-tyrosine phosphatase	Signal transduction mechanisms	Cellular processes and signaling
alt76_01538	hypothetical protein	NA	NA	NA	NA	NA	NA
alt76_01539	hypothetical protein	NA	NA	NA	NA	NA	NA
alt76_01540	O-antigen ligase	NA	NA	NA	NA	NA	NA
alt76_01541	hypothetical protein	NA	NA	NA	NA	NA	NA
alt76_01542	diguanylate cyclase/phosphodiesterase	NA	NA	NA	NA	NA	NA
alt76_01543	transglutaminase-like cysteine proteinase BTLCP	NA	NA	NA	NA	NA	NA
alt76_01544	N-acetylgalactosamine-N,N'-diacetylbacillosaminyl-diphospho-undecaprenol 4-alpha-N-acetylgalactosaminyltransferase	GT4	3.7e-32	NA	NA	NA	NA
alt76_01545	O-antigen ligase-like membrane protein	NA	NA	NA	NA	NA	NA
alt76_01546	glycosyltransferase involved in cell wall biosynthesis	GT4	7e-10	K16697	tuaC; teichuronic acid biosynthesis glycosyltransferase TuaC	Glycosyltransferases [BR:ko01003]	Glycan biosynthesis and metabolism
alt76_01547	glycosyl transferase family 2	GT2	1e-07	NA	NA	NA	NA
alt76_01548	O-antigen/teichoic acid export membrane protein	NA	NA	K16695	wzxC; lipopolysaccharide exporter	Transporters [BR:ko02000]	Membrane transport
alt76_01549	colanic acid/amylovoran biosynthesis glycosyltransferase	GT4	2.2e-31	K16703	wcaL, amsK; colanic acid/amylovoran biosynthesis glycosyltransferase	Glycosyltransferases [BR:ko01003]	Glycan biosynthesis and metabolism
alt76_01550	predicted secreted protein with PEP-CTERM sorting signal	NA	NA	NA	NA	NA	NA
alt76_01551	sulfotransferase family protein	NA	NA	NA	NA	NA	NA
alt76_01552	parallel beta helix pectate lyase-like protein	NA	NA	NA	NA	NA	NA
alt76_01553	glycosyltransferase involved in cell wall biosynthesis	GT4	5.5e-26	K19002	mgs, bgsB; 1,2-diacylglycerol 3-alpha-glucosyltransferase	Glycosyltransferases [BR:ko01003]	Glycan biosynthesis and metabolism
alt76_01554	glycosyltransferase involved in cell wall biosynthesis	GT2	5.8e-22	NA	NA	NA	NA
alt76_01555	peptidoglycan/LPS O-acetylase OafA/YrhL	NA	NA	NA	NA	NA	NA
alt76_01556	peptidoglycan/LPS O-acetylase OafA/YrhL	NA	NA	NA	NA	NA	NA
alt76_01557	sulfotransferase family protein	NA	NA	NA	NA	NA	NA
alt76_01558	hypothetical protein	NA	NA	NA	NA	NA	NA
alt76_01559	phenylalanyl-tRNA synthetase alpha subunit	NA	NA	K01889	FARSA, pheS; phenylalanyl-tRNA synthetase alpha chain	Aminoacyl-tRNA biosynthesis [PATH:ko00970]	Translation
alt76_01560	phenylalanyl-tRNA synthetase beta subunit	NA	NA	K01890	FARSB, pheT; phenylalanyl-tRNA synthetase beta chain	Amino acid related enzymes [BR:ko01007]	Amino acid metabolism
alt76_01561	integration host factor subunit alpha	NA	NA	K04764	ihfA, himA; integration host factor subunit alpha	DNA replication proteins [BR:ko03032]	Replication and repair
alt76_01562	hypothetical protein	NA	NA	NA	NA	NA	NA
alt76_01563	ParD-like antitoxin of type II ParDE toxin-antitoxin system	NA	NA	NA	NA	NA	NA
alt76_01564	ParE-like toxin of type II ParDE toxin-antitoxin system	NA	NA	NA	NA	NA	NA
alt76_01565	Cys-tRNA(Pro)/Cys-tRNA(Cys) deacylase	NA	NA	K03976	ybaK, ebsC; Cys-tRNA(Pro)/Cys-tRNA(Cys) deacylase	Transfer RNA biogenesis [BR:ko03016]	Translation
alt76_01566	penicillin amidase	NA	NA	K01434	E3.5.1.11; penicillin amidase	Peptidases [BR:ko01002]	Enzyme families
alt76_01567	beta-N-acetylhexosaminidase	GH3	5.5e-48	K01207	nagZ; beta-N-acetylhexosaminidase	Amino sugar and nucleotide sugar metabolism [PATH:ko00520]	Carbohydrate metabolism
alt76_01568	sodium-dependent dicarboxylate transporter 2/3/5	NA	NA	K14445	SLC13A2_3_5; solute carrier family 13 (sodium-dependent dicarboxylate transporter), member 2/3/5	Transporters [BR:ko02000]	Membrane transport
alt76_01569	cob(I)alamin adenosyltransferase	NA	NA	K00798	MMAB, pduO; cob(I)alamin adenosyltransferase	Porphyrin and chlorophyll metabolism [PATH:ko00860]	Metabolism of cofactors and vitamins
alt76_01570	peptidoglycan-binding protein CsiV	NA	NA	NA	NA	NA	NA
alt76_01571	transcription-repair coupling factor	NA	NA	K03723	mfd; transcription-repair coupling factor (superfamily II helicase)	Nucleotide excision repair [PATH:ko03420]	Replication and repair
alt76_01572	PilZ domain-containing protein	NA	NA	NA	NA	NA	NA
alt76_01573	lipoprotein-releasing system permease protein	NA	NA	K09808	lolC_E; lipoprotein-releasing system permease protein	ABC transporters [PATH:ko02010]	Membrane transport
alt76_01574	hypothetical protein	NA	NA	K07101	K07101; uncharacterized protein	Function unknown	Poorly characterized
alt76_01575	hypothetical protein	NA	NA	NA	NA	NA	NA
alt76_01576	uncharacterized membrane protein	NA	NA	NA	NA	NA	NA
alt76_01577	exodeoxyribonuclease III	NA	NA	K01142	E3.1.11.2, xthA; exodeoxyribonuclease III	DNA repair and recombination proteins [BR:ko03400]	Replication and repair
alt76_01578	heme oxygenase	NA	NA	NA	NA	NA	NA
alt76_01579	uncharacterized protein DUF2750	NA	NA	NA	NA	NA	NA
alt76_01580	cysteine desulfuration protein SufE	NA	NA	NA	NA	NA	NA
alt76_01581	glycosyltransferase involved in cell wall biosynthesis	NA	NA	NA	NA	NA	NA
alt76_01582	HD-like signal output (HDOD) protein	NA	NA	NA	NA	NA	NA
alt76_01583	acyl-CoA thioesterase II	NA	NA	NA	NA	NA	NA
alt76_01584	predicted MFS family arabinose efflux permease	NA	NA	NA	NA	NA	NA
alt76_01585	pimeloyl-ACP methyl ester carboxylesterase	NA	NA	NA	NA	NA	NA
alt76_01586	glucose-1-phosphate adenylyltransferase	NA	NA	K00975	glgC; glucose-1-phosphate adenylyltransferase	Biofilm formation - Escherichia coli [PATH:ko02026]	Cellular community - prokaryotes
alt76_01587	purine nucleosidase	NA	NA	K01239	iunH; purine nucleosidase	Nicotinate and nicotinamide metabolism [PATH:ko00760]	Metabolism of cofactors and vitamins
alt76_01588	polyketide cyclase/dehydrase/lipid transport protein	NA	NA	NA	NA	NA	NA
alt76_01589	MFS transporter	NA	NA	NA	NA	NA	NA
alt76_01590	PAS domain S-box-containing protein/diguanylate cyclase (GGDEF)-like protein	NA	NA	NA	NA	NA	NA
alt76_01591	hypothetical protein	NA	NA	NA	NA	NA	NA
alt76_01592	hydroxymethylglutaryl-CoA lyase	NA	NA	K01640	E4.1.3.4, HMGCL, hmgL; hydroxymethylglutaryl-CoA lyase	Synthesis and degradation of ketone bodies [PATH:ko00072]	Lipid metabolism
alt76_01593	3-methylcrotonyl-CoA carboxylase alpha subunit	NA	NA	K01968	E6.4.1.4A; 3-methylcrotonyl-CoA carboxylase alpha subunit	Valine, leucine and isoleucine degradation [PATH:ko00280]	Amino acid metabolism
alt76_01594	methylglutaconyl-CoA hydratase	NA	NA	K13766	liuC; methylglutaconyl-CoA hydratase	Valine, leucine and isoleucine degradation [PATH:ko00280]	Amino acid metabolism
alt76_01595	3-methylcrotonyl-CoA carboxylase beta subunit	NA	NA	K01969	E6.4.1.4B; 3-methylcrotonyl-CoA carboxylase beta subunit	Valine, leucine and isoleucine degradation [PATH:ko00280]	Amino acid metabolism
alt76_01596	isovaleryl-CoA dehydrogenase	NA	NA	K00253	IVD, ivd; isovaleryl-CoA dehydrogenase	Valine, leucine and isoleucine degradation [PATH:ko00280]	Amino acid metabolism
alt76_01597	MerR family transcriptional regulator	NA	NA	NA	NA	NA	NA
alt76_01598	acetyl-CoA C-acetyltransferase	NA	NA	K00626	E2.3.1.9, atoB; acetyl-CoA C-acetyltransferase	Exosome [BR:ko04147]	Transport and catabolism
alt76_01599	diguanylate cyclase (GGDEF)-like protein	NA	NA	NA	NA	NA	NA
alt76_01600	hypothetical protein	NA	NA	NA	NA	NA	NA
alt76_01601	exodeoxyribonuclease I subunit C	NA	NA	K01141	sbcB, exoI; exodeoxyribonuclease I	DNA repair and recombination proteins [BR:ko03400]	Replication and repair
alt76_01602	PAS/PAC sensor hybrid histidine kinase	NA	NA	K07677	rcsC; two-component system, NarL family, capsular synthesis sensor histidine kinase RcsC	Two-component system [BR:ko02022]	Signal transduction
alt76_01603	CBS domain protein	NA	NA	NA	NA	NA	NA
alt76_01604	3-phytase	NA	NA	K01083	E3.1.3.8; 3-phytase	Inositol phosphate metabolism [PATH:ko00562]	Carbohydrate metabolism
alt76_01605	calcineurin-like phosphoesterase family protein	NA	NA	K14379	ACP5; tartrate-resistant acid phosphatase type 5	Osteoclast differentiation [PATH:ko04380]	Development
alt76_01606	hypothetical protein	NA	NA	NA	NA	NA	NA
alt76_01607	TonB-dependent receptor	NA	NA	NA	NA	NA	NA
alt76_01608	diguanylate cyclase (GGDEF)-like protein	NA	NA	NA	NA	NA	NA
alt76_01609	AraC family transcriptional regulator	NA	NA	NA	NA	NA	NA
alt76_01610	putative methionine transporter (NhaC family)	NA	NA	NA	NA	NA	NA
alt76_01611	ATP-dependent helicase HrpA	NA	NA	K03578	hrpA; ATP-dependent helicase HrpA	Replication, recombination and repair proteins	Genetic information processing
alt76_01612	PilZ domain-containing protein	NA	NA	NA	NA	NA	NA
alt76_01613	uncharacterized membrane protein	NA	NA	NA	NA	NA	NA
alt76_01614	23S rRNA (cytosine1962-C5)-methyltransferase	NA	NA	K06969	rlmI; 23S rRNA (cytosine1962-C5)-methyltransferase	Ribosome biogenesis [BR:ko03009]	Translation
alt76_01615	putative PIG3 family NAD(P)H quinone oxidoreductase	NA	NA	K10133	TP53I3; tumor protein p53-inducible protein 3	p53 signaling pathway [PATH:ko04115]	Cell growth and death
alt76_01616	ribonuclease HI	NA	NA	K03469	rnhA, RNASEH1; ribonuclease HI	DNA replication proteins [BR:ko03032]	Replication and repair
alt76_01617	DNA polymerase-3 subunit epsilon	NA	NA	K02342	DPO3E, dnaQ; DNA polymerase III subunit epsilon	Pyrimidine metabolism [PATH:ko00240]	Nucleotide metabolism
alt76_01618	uncharacterized protein (TIGR03503 family)	NA	NA	NA	NA	NA	NA
alt76_01623	sensor c-di-GMP phosphodiesterase-like protein	NA	NA	NA	NA	NA	NA
alt76_01624	lipoprotein-releasing system ATP-binding protein	NA	NA	K09810	lolD; lipoprotein-releasing system ATP-binding protein	Transporters [BR:ko02000]	Membrane transport
alt76_01625	lipoprotein-releasing system permease protein	NA	NA	K09808	lolC_E; lipoprotein-releasing system permease protein	ABC transporters [PATH:ko02010]	Membrane transport
alt76_01626	Na+/H+-dicarboxylate symporter	NA	NA	K11102	gltP, gltT; proton glutamate symport protein	Transporters [BR:ko02000]	Membrane transport
alt76_01627	Ig-like protein group 1	NA	NA	NA	NA	NA	NA
alt76_01628	succinylarginine dihydrolase	NA	NA	K01484	astB; succinylarginine dihydrolase	Arginine and proline metabolism [PATH:ko00330]	Amino acid metabolism
alt76_01629	DNA topoisomerase I	NA	NA	K03168	topA; DNA topoisomerase I	DNA repair and recombination proteins [BR:ko03400]	Replication and repair
alt76_01630	hypothetical protein	NA	NA	K09912	K09912; uncharacterized protein	Function unknown	Poorly characterized
alt76_01631	DNA-binding transcriptional LysR family regulator	NA	NA	NA	NA	NA	NA
alt76_01632	cyanate permease	NA	NA	NA	NA	NA	NA
alt76_01633	adenosine deaminase	NA	NA	K01488	add, ADA; adenosine deaminase	Primary immunodeficiency [PATH:ko05340]	Immune diseases
alt76_01634	hypothetical protein	NA	NA	K07006	K07006; uncharacterized protein	Function unknown	Poorly characterized
alt76_01635	glutathione S-transferase	NA	NA	K00799	GST, gst; glutathione S-transferase	Drug metabolism - cytochrome P450 [PATH:ko00982]	Xenobiotics biodegradation and metabolism
alt76_01636	hypothetical protein	NA	NA	K09958	K09958; uncharacterized protein	Function unknown	Poorly characterized
alt76_01637	DNA-binding transcriptional LysR family regulator	NA	NA	NA	NA	NA	NA
alt76_01638	hypothetical protein	NA	NA	NA	NA	NA	NA
alt76_01639	ElaA protein	NA	NA	K02348	elaA; ElaA protein	General function prediction only	Poorly characterized
alt76_01640	2-haloacid dehalogenase	NA	NA	NA	NA	NA	NA
alt76_01641	TetR family transcriptional regulator	NA	NA	K22041	comR; TetR/AcrR family transcriptional regulator, copper-responsive repressor	Transcription factors [BR:ko03000]	Transcription
alt76_01642	ecdysteroid kinase	NA	NA	NA	NA	NA	NA
alt76_01643	RNAse E	NA	NA	K08300	rne; ribonuclease E	Messenger RNA Biogenesis [BR:ko03019]	Translation
alt76_01644	ribosomal large subunit pseudouridine synthase C	NA	NA	K06179	rluC; 23S rRNA pseudouridine955/2504/2580 synthase	Ribosome biogenesis [BR:ko03009]	Translation
alt76_01645	phosphoglycolate phosphatase	NA	NA	K01091	gph; phosphoglycolate phosphatase	Glyoxylate and dicarboxylate metabolism [PATH:ko00630]	Carbohydrate metabolism
alt76_01646	MAF protein	NA	NA	NA	NA	NA	NA
alt76_01647	uncharacterized protein	NA	NA	K07040	K07040; uncharacterized protein	Function unknown	Poorly characterized
alt76_01648	LSU ribosomal protein L32P	NA	NA	K02911	RP-L32, MRPL32, rpmF; large subunit ribosomal protein L32	Ribosome [BR:ko03011]	Translation
alt76_01649	phosphate:acyl-[acyl carrier protein] acyltransferase	NA	NA	K03621	plsX; glycerol-3-phosphate acyltransferase PlsX	Glycerolipid metabolism [PATH:ko00561]	Lipid metabolism
alt76_01650	3-oxoacyl-[acyl-carrier-protein] synthase III	NA	NA	K00648	fabH; 3-oxoacyl-[acyl-carrier-protein] synthase III	Lipid biosynthesis proteins [BR:ko01004]	Lipid metabolism
alt76_01651	[acyl-carrier-protein] S-malonyltransferase	NA	NA	K00645	fabD; [acyl-carrier-protein] S-malonyltransferase	Prodigiosin biosyntheses [PATH:ko00333]	Biosynthesis of other secondary metabolites
alt76_01652	3-oxoacyl-[acyl-carrier-protein] reductase	NA	NA	K00059	fabG; 3-oxoacyl-[acyl-carrier protein] reductase	Biotin metabolism [PATH:ko00780]	Metabolism of cofactors and vitamins
alt76_01653	acyl carrier protein	NA	NA	K02078	acpP; acyl carrier protein	Fatty acid biosynthesis [PATH:ko00061]	Lipid metabolism
alt76_01654	3-oxoacyl-[acyl-carrier-protein] synthase II	NA	NA	K09458	fabF; 3-oxoacyl-[acyl-carrier-protein] synthase II	Fatty acid biosynthesis [PATH:ko00061]	Lipid metabolism
alt76_01655	aminodeoxychorismate lyase apoprotein	NA	NA	K02619	pabC; 4-amino-4-deoxychorismate lyase	Folate biosynthesis [PATH:ko00790]	Metabolism of cofactors and vitamins
alt76_01656	UPF0755 protein	NA	NA	K07082	K07082; UPF0755 protein	General function prediction only	Poorly characterized
alt76_01657	thymidylate kinase	NA	NA	K00943	tmk, DTYMK; dTMP kinase	Pyrimidine metabolism [PATH:ko00240]	Nucleotide metabolism
alt76_01658	DNA polymerase-3 subunit delta'	NA	NA	K02341	DPO3D2, holB; DNA polymerase III subunit delta'	Mismatch repair [PATH:ko03430]	Replication and repair
alt76_01659	TatD DNase family protein	NA	NA	K03424	tatD; TatD DNase family protein	Replication, recombination and repair proteins	Genetic information processing
alt76_01660	PPOX class probable FMN-dependent enzyme	NA	NA	K00275	pdxH, PNPO; pyridoxamine 5'-phosphate oxidase	Vitamin B6 metabolism [PATH:ko00750]	Metabolism of cofactors and vitamins
alt76_01661	uncharacterized protein YbjT (DUF2867 family)	NA	NA	NA	NA	NA	NA
alt76_01662	diguanylate cyclase (GGDEF)-like protein	NA	NA	NA	NA	NA	NA
alt76_01663	peptidyl-dipeptidase A	NA	NA	K01283	ACE, CD143; peptidyl-dipeptidase A	CD Molecules [BR:ko04090]	Signaling molecules and interaction
alt76_01664	hypothetical protein	NA	NA	NA	NA	NA	NA
alt76_01665	peptidase M23-like protein	NA	NA	K21472	lytH; peptidoglycan LD-endopeptidase LytH	Peptidoglycan biosynthesis and degradation proteins [BR:ko01011]	Glycan biosynthesis and metabolism
alt76_01666	uncharacterized RDD family membrane protein YckC	NA	NA	NA	NA	NA	NA
alt76_01667	protein-S-isoprenylcysteine O-methyltransferase Ste14	NA	NA	NA	NA	NA	NA
alt76_01668	uncharacterized membrane protein YsdA (DUF1294 family)	NA	NA	NA	NA	NA	NA
alt76_01669	hypothetical protein	CE1	4.2e-29	NA	NA	NA	NA
alt76_01670	tautomerase-like protein	NA	NA	NA	NA	NA	NA
alt76_01671	rhombotail lipoprotein	NA	NA	NA	NA	NA	NA
alt76_01672	WD40 repeat protein	NA	NA	NA	NA	NA	NA
alt76_01673	TonB-dependent receptor-like protein	NA	NA	NA	NA	NA	NA
alt76_01674	FecR family protein	NA	NA	NA	NA	NA	NA
alt76_01675	RNA polymerase sigma-70 factor (ECF subfamily)	NA	NA	K03088	SIG3.2, rpoE; RNA polymerase sigma-70 factor, ECF subfamily	Transcription machinery [BR:ko03021]	Transcription
alt76_01676	hypothetical protein	NA	NA	NA	NA	NA	NA
alt76_01677	hypothetical protein	NA	NA	K09773	ppsR; [pyruvate, water dikinase]-phosphate phosphotransferase / [pyruvate, water dikinase] kinase	Carbohydrate metabolism	Metabolism
alt76_01678	phosphoenolpyruvate synthase	NA	NA	K01007	pps, ppsA; pyruvate, water dikinase	Methane metabolism [PATH:ko00680]	Energy metabolism
alt76_01679	isoquinoline 1-oxidoreductase beta subunit	NA	NA	K07303	iorB; isoquinoline 1-oxidoreductase subunit beta	Energy metabolism	Metabolism
alt76_01680	isoquinoline 1-oxidoreductase alpha subunit	NA	NA	K07302	iorA; isoquinoline 1-oxidoreductase subunit alpha	Energy metabolism	Metabolism
alt76_01681	putative transmembrane protein PGPGW	NA	NA	NA	NA	NA	NA
alt76_01682	hypothetical protein	NA	NA	K07088	K07088; uncharacterized protein	Function unknown	Poorly characterized
alt76_01683	LacI family transcriptional regulator	NA	NA	K02525	kdgR; LacI family transcriptional regulator, kdg operon repressor	Transcription factors [BR:ko03000]	Transcription
alt76_01684	poly(beta-D-mannuronate) lyase	PL7_5	8.2e-87	NA	NA	NA	NA
alt76_01685	TonB-dependent receptor	NA	NA	NA	NA	NA	NA
alt76_01686	3-oxoacyl-[acyl-carrier protein] reductase	NA	NA	K00059	fabG; 3-oxoacyl-[acyl-carrier protein] reductase	Biotin metabolism [PATH:ko00780]	Metabolism of cofactors and vitamins
alt76_01687	Mn2+/Fe2+ NRAMP family transporter	NA	NA	NA	NA	NA	NA
alt76_01688	gluconokinase	NA	NA	K00851	E2.7.1.12, gntK, idnK; gluconokinase	Pentose phosphate pathway [PATH:ko00030]	Carbohydrate metabolism
alt76_01689	poly(beta-D-mannuronate) lyase	PL6	8e-128	NA	NA	NA	NA
alt76_01690	uncharacterized protein DUF998	NA	NA	NA	NA	NA	NA
alt76_01691	PhzF family phenazine biosynthesis protein	NA	NA	K06998	phzF; trans-2,3-dihydro-3-hydroxyanthranilate isomerase	Phenazine biosynthesis [PATH:ko00405]	Biosynthesis of other secondary metabolites
alt76_01692	hypothetical protein	NA	NA	NA	NA	NA	NA
alt76_01693	hypothetical protein	NA	NA	NA	NA	NA	NA
alt76_01694	PadR family transcriptional regulator	NA	NA	K10947	padR; PadR family transcriptional regulator, regulatory protein PadR	Transcription factors [BR:ko03000]	Transcription
alt76_01695	hypothetical protein	NA	NA	NA	NA	NA	NA
alt76_01696	calcineurin-like phosphoesterase family protein	NA	NA	NA	NA	NA	NA
alt76_01697	glucans biosynthesis protein	NA	NA	NA	NA	NA	NA
alt76_01698	phosphatidylglycerophosphatase C	NA	NA	K18697	pgpC; phosphatidylglycerophosphatase C	Glycerophospholipid metabolism [PATH:ko00564]	Lipid metabolism
alt76_01699	hypothetical protein	NA	NA	NA	NA	NA	NA
alt76_01700	hypothetical protein	NA	NA	NA	NA	NA	NA
alt76_01701	hypothetical protein	NA	NA	K09913	K09913; uncharacterized protein	Function unknown	Poorly characterized
alt76_01702	FAD/FMN-containing dehydrogenase	NA	NA	NA	NA	NA	NA
alt76_01703	uncharacterized protein DUF4826	NA	NA	NA	NA	NA	NA
alt76_01704	predicted GNAT family N-acyltransferase	NA	NA	NA	NA	NA	NA
alt76_01705	50S ribosomal protein L16 3-hydroxylase	NA	NA	K18850	ycfD; 50S ribosomal protein L16 3-hydroxylase	Ribosome biogenesis [BR:ko03009]	Translation
alt76_01706	adenylate/guanylate cyclase family protein	NA	NA	K01768	E4.6.1.1; adenylate cyclase	Meiosis - yeast [PATH:ko04113]	Cell growth and death
alt76_01707	adenylosuccinate lyase	NA	NA	K01756	purB, ADSL; adenylosuccinate lyase	Purine metabolism [PATH:ko00230]	Nucleotide metabolism
alt76_01708	high frequency lysogenization protein	NA	NA	K07153	hflD; high frequency lysogenization protein	General function prediction only	Poorly characterized
alt76_01709	tRNA (5-methylaminomethyl-2-thiouridylate)-methyltransferase	NA	NA	K00566	mnmA, trmU; tRNA-uridine 2-sulfurtransferase	Transfer RNA biogenesis [BR:ko03016]	Translation
alt76_01710	ribosomal large subunit pseudouridine synthase E	NA	NA	K06181	rluE; 23S rRNA pseudouridine2457 synthase	Ribosome biogenesis [BR:ko03009]	Translation
alt76_01711	isocitrate dehydrogenase	NA	NA	K00031	IDH1, IDH2, icd; isocitrate dehydrogenase	Carbon fixation pathways in prokaryotes [PATH:ko00720]	Energy metabolism
alt76_01712	putative cold-shock DNA-binding protein	NA	NA	K03704	cspA; cold shock protein (beta-ribbon, CspA family)	Transcription factors [BR:ko03000]	Transcription
alt76_01713	ATP-dependent Clp protease adaptor protein ClpS	NA	NA	K06891	clpS; ATP-dependent Clp protease adaptor protein ClpS	Protein folding and associated processing	Genetic information processing
alt76_01714	ATP-dependent Clp protease ATP-binding subunit ClpA	NA	NA	K03694	clpA; ATP-dependent Clp protease ATP-binding subunit ClpA	Chaperones and folding catalysts [BR:ko03110]	Folding, sorting and degradation	MER0298702	subfamily S49B unassigned peptidases	0.0e+00
alt76_01715	translation initiation factor 1 (bIF-1)	NA	NA	K02518	infA; translation initiation factor IF-1	Translation factors [BR:ko03012]	Translation
alt76_01716	arginine-tRNA-protein transferase	NA	NA	K21420	bpt; leucyl-tRNA---protein transferase	Protein folding and associated processing	Genetic information processing
alt76_01717	leucyl/phenylalanyl-tRNA--protein transferase	NA	NA	K00684	aat; leucyl/phenylalanyl-tRNA---protein transferase	Protein folding and associated processing	Genetic information processing
alt76_01718	thioredoxin reductase (NADPH)	NA	NA	K00384	trxB, TRR; thioredoxin reductase (NADPH)	Selenocompound metabolism [PATH:ko00450]	Metabolism of other amino acids
alt76_01719	hypothetical protein	NA	NA	K09899	K09899; uncharacterized protein	Function unknown	Poorly characterized
alt76_01720	signal peptide peptidase A	NA	NA	K04773	sppA; protease IV	Peptidases [BR:ko01002]	Enzyme families	MER0248696	family S11 unassigned peptidases	3.8e-232
alt76_01721	hypothetical protein	NA	NA	NA	NA	NA	NA
alt76_01722	uncharacterized membrane protein YphA (DoxX/SURF4 family)	NA	NA	NA	NA	NA	NA
alt76_01723	nitroreductase	NA	NA	NA	NA	NA	NA
alt76_01724	uncharacterized protein DUF2797	NA	NA	NA	NA	NA	NA
alt76_01725	L-asparaginase	NA	NA	K01424	E3.5.1.1, ansA, ansB; L-asparaginase	Alanine, aspartate and glutamate metabolism [PATH:ko00250]	Amino acid metabolism
alt76_01726	uncharacterized protein (DUF885 family)	NA	NA	NA	NA	NA	NA
alt76_01727	lipoic acid synthetase	NA	NA	K03644	lipA; lipoyl synthase	Lipoic acid metabolism [PATH:ko00785]	Metabolism of cofactors and vitamins
alt76_01728	lipoyl(octanoyl) transferase	NA	NA	K03801	lipB; lipoyl(octanoyl) transferase	Lipoic acid metabolism [PATH:ko00785]	Metabolism of cofactors and vitamins
alt76_01729	hypothetical protein	NA	NA	K09158	K09158; uncharacterized protein	Function unknown	Poorly characterized
alt76_01730	penicillin-binding protein 6	NA	NA	K07258	dacC, dacA, dacD; serine-type D-Ala-D-Ala carboxypeptidase (penicillin-binding protein 5/6)	Peptidases [BR:ko01002]	Enzyme families	MER0248676	family S16 unassigned peptidases	1.4e-170
alt76_01731	rare lipoprotein A	NA	NA	K03642	rlpA; rare lipoprotein A	Membrane and intracellular structural molecules	Cellular processes and signaling
alt76_01732	cell elongation-specific peptidoglycan biosynthesis regulator RodA	NA	NA	K05837	rodA, mrdB; rod shape determining protein RodA	Chromosome and associated proteins [BR:ko03036]	Replication and repair
alt76_01733	penicillin-binding protein 2	NA	NA	K05515	mrdA; penicillin-binding protein 2	Peptidoglycan biosynthesis and degradation proteins [BR:ko01011]	Glycan biosynthesis and metabolism
alt76_01734	23S rRNA (pseudouridine-1915-N(3)-) methyltransferase	NA	NA	K00783	rlmH; 23S rRNA (pseudouridine1915-N3)-methyltransferase	Ribosome biogenesis [BR:ko03009]	Translation
alt76_01735	ribosome-associated protein	NA	NA	K09710	ybeB; ribosome-associated protein	Ribosome biogenesis [BR:ko03009]	Translation
alt76_01736	nicotinate-nucleotide adenylyltransferase	NA	NA	K00969	nadD; nicotinate-nucleotide adenylyltransferase	Nicotinate and nicotinamide metabolism [PATH:ko00760]	Metabolism of cofactors and vitamins
alt76_01737	DNA polymerase III delta subunit	NA	NA	K02340	DPO3D1, holA; DNA polymerase III subunit delta	Mismatch repair [PATH:ko03430]	Replication and repair
alt76_01738	LPS-assembly lipoprotein	NA	NA	K03643	lptE, rlpB; LPS-assembly lipoprotein	Transporters [BR:ko02000]	Membrane transport
alt76_01739	leucyl-tRNA synthetase	NA	NA	K01869	LARS, leuS; leucyl-tRNA synthetase	Mitochondrial biogenesis [BR:ko03029]	Translation
alt76_01740	predicted ATP-dependent protease	NA	NA	NA	NA	NA	NA	MER0248653	FtsH peptidase	1.6e-180
alt76_01741	NAD(P)-dependent dehydrogenase (short-subunit alcohol dehydrogenase family)	NA	NA	K08683	HSD17B10; 3-hydroxyacyl-CoA dehydrogenase / 3-hydroxy-2-methylbutyryl-CoA dehydrogenase	Mitochondrial biogenesis [BR:ko03029]	Translation
alt76_01742	RNA-binding protein	NA	NA	K07574	yhbY; RNA-binding protein	Ribosome biogenesis [BR:ko03009]	Translation
alt76_01743	23S rRNA Um-2552 2'-O-methyltransferase	NA	NA	K02427	rlmE, rrmJ, ftsJ; 23S rRNA (uridine2552-2'-O)-methyltransferase	Ribosome biogenesis [BR:ko03009]	Translation
alt76_01744	membrane protease FtsH catalytic subunit	NA	NA	K03798	ftsH, hflB; cell division protease FtsH	Peptidases [BR:ko01002]	Enzyme families	family S9 unassigned peptidases	1.6e-306
alt76_01745	dihydropteroate synthase	NA	NA	K00796	folP; dihydropteroate synthase	Folate biosynthesis [PATH:ko00790]	Metabolism of cofactors and vitamins
alt76_01746	phosphoglucosamine mutase	NA	NA	K03431	glmM; phosphoglucosamine mutase	Amino sugar and nucleotide sugar metabolism [PATH:ko00520]	Carbohydrate metabolism
alt76_01747	triosephosphate isomerase	NA	NA	K01803	TPI, tpiA; triosephosphate isomerase (TIM)	Glycolysis / Gluconeogenesis [PATH:ko00010]	Carbohydrate metabolism
alt76_01748	protein translocase subunit secG	NA	NA	K03075	secG; preprotein translocase subunit SecG	Quorum sensing [PATH:ko02024]	Cellular community - prokaryotes
alt76_01750	diguanylate cyclase/phosphodiesterase	NA	NA	NA	NA	NA	NA
alt76_01751	uncharacterized membrane protein YqaE (UPF0057 family)	NA	NA	NA	NA	NA	NA
alt76_01752	hemerythrin HHE cation binding domain-containing protein	NA	NA	NA	NA	NA	NA
alt76_01753	diacylglycerol kinase family enzyme	NA	NA	NA	NA	NA	NA
alt76_01754	uncharacterized protein DUF2878	NA	NA	NA	NA	NA	NA
alt76_01755	hypothetical protein	NA	NA	NA	NA	NA	NA
alt76_01756	DNA topoisomerase-1	NA	NA	K03168	topA; DNA topoisomerase I	DNA repair and recombination proteins [BR:ko03400]	Replication and repair
alt76_01757	SSS family solute:Na+ symporter	NA	NA	K03307	TC.SSS; solute:Na+ symporter, SSS family	Transport	Cellular processes and signaling
alt76_01758	glutamate 5-kinase	NA	NA	NA	NA	NA	NA
alt76_01759	glutamate-5-semialdehyde dehydrogenase	NA	NA	K00147	proA; glutamate-5-semialdehyde dehydrogenase	Carbapenem biosynthesis [PATH:ko00332]	Biosynthesis of other secondary metabolites
alt76_01760	mechanosensitive ion channel-like protein	NA	NA	NA	NA	NA	NA
alt76_01761	HNH endonuclease	NA	NA	NA	NA	NA	NA
alt76_01762	polyribonucleotide nucleotidyltransferase	NA	NA	K00962	pnp, PNPT1; polyribonucleotide nucleotidyltransferase	RNA degradation [PATH:ko03018]	Folding, sorting and degradation
alt76_01763	hypothetical protein	NA	NA	K09948	K09948; uncharacterized protein	Function unknown	Poorly characterized
alt76_01764	molybdate transport system ATP-binding protein	NA	NA	K05776	modF; molybdate transport system ATP-binding protein	ABC transporters [PATH:ko02010]	Membrane transport
alt76_01765	putative acetyltransferase	NA	NA	K03829	yedL; putative acetyltransferase	Others	Metabolism
alt76_01766	hypothetical protein	NA	NA	NA	NA	NA	NA
alt76_01767	uncharacterized protein DUF2132	NA	NA	NA	NA	NA	NA
alt76_01768	uncharacterized LabA/DUF88 family protein	NA	NA	NA	NA	NA	NA
alt76_01769	light-regulated signal transduction histidine kinase (bacteriophytochrome)	NA	NA	NA	NA	NA	NA
alt76_01770	PAS domain S-box-containing protein/diguanylate cyclase (GGDEF)-like protein	NA	NA	NA	NA	NA	NA
alt76_01771	uncharacterized membrane protein YoaK (UPF0700 family)	NA	NA	NA	NA	NA	NA
alt76_01772	hypothetical protein	NA	NA	NA	NA	NA	NA
alt76_01773	hypothetical protein	NA	NA	NA	NA	NA	NA
alt76_01774	methionine synthase (B12-independent)	NA	NA	K00549	metE; 5-methyltetrahydropteroyltriglutamate--homocysteine methyltransferase	Cysteine and methionine metabolism [PATH:ko00270]	Amino acid metabolism
alt76_01775	uncharacterized protein DUF1852	NA	NA	NA	NA	NA	NA
alt76_01776	hypothetical protein	NA	NA	NA	NA	NA	NA
alt76_01777	hypothetical protein	NA	NA	NA	NA	NA	NA
alt76_01778	DNA sulfur modification protein DndD	NA	NA	NA	NA	NA	NA
alt76_01779	putative transposase	NA	NA	K07497	K07497; putative transposase	Replication, recombination and repair proteins	Genetic information processing
alt76_01780	SEC-C motif-containing protein	NA	NA	K09858	K09858; SEC-C motif domain protein	General function prediction only	Poorly characterized
alt76_01781	hypothetical protein	NA	NA	NA	NA	NA	NA
alt76_01782	membrane protein YqaA with SNARE-associated domain	NA	NA	NA	NA	NA	NA
alt76_01783	sulfoxide reductase heme-binding subunit YedZ	NA	NA	K17247	msrQ; methionine sulfoxide reductase heme-binding subunit	Protein folding and associated processing	Genetic information processing
alt76_01784	sulfoxide reductase catalytic subunit YedY	NA	NA	K07147	msrP; methionine sulfoxide reductase catalytic subunit	Protein folding and associated processing	Genetic information processing
alt76_01785	RDD family protein	NA	NA	NA	NA	NA	NA
alt76_01786	dGTPase	NA	NA	K01129	dgt; dGTPase	Purine metabolism [PATH:ko00230]	Nucleotide metabolism
alt76_01787	5'-deoxynucleotidase	NA	NA	K08722	yfbR; 5'-deoxynucleotidase	Pyrimidine metabolism [PATH:ko00240]	Nucleotide metabolism
alt76_01788	alanine-synthesizing transaminase	NA	NA	K14260	alaA; alanine-synthesizing transaminase	Alanine, aspartate and glutamate metabolism [PATH:ko00250]	Amino acid metabolism
alt76_01789	uncharacterized membrane protein	NA	NA	NA	NA	NA	NA
alt76_01790	uncharacterized protein DUF3718	NA	NA	NA	NA	NA	NA
alt76_01791	multidrug efflux pump subunit AcrB	NA	NA	K03296	TC.HAE1; hydrophobic/amphiphilic exporter-1 (mainly G- bacteria), HAE1 family	Transport	Cellular processes and signaling
alt76_01792	Cu/Ag efflux pump CusA	NA	NA	NA	NA	NA	NA
alt76_01793	RND family efflux transporter MFP subunit	NA	NA	K18302	mexJ; membrane fusion protein, multidrug efflux system	Antimicrobial resistance genes [BR:ko01504]	Drug resistance
alt76_01794	putative redox protein	NA	NA	K07397	yhfA; putative redox protein	Protein folding and associated processing	Genetic information processing
alt76_01795	hypothetical protein	NA	NA	K00243	K00243; uncharacterized protein	Function unknown	Poorly characterized
alt76_01796	UPF0271 protein	NA	NA	K07160	K07160; UPF0271 protein	General function prediction only	Poorly characterized
alt76_01797	KipI family sensor histidine kinase inhibitor	NA	NA	NA	NA	NA	NA
alt76_01798	biotin-dependent carboxylase-like uncharacterized protein	NA	NA	K06350	kipA; antagonist of KipI	Cell growth	Cellular processes and signaling
alt76_01799	D-alanine transaminase	NA	NA	K00824	dat; D-alanine transaminase	Arginine and proline metabolism [PATH:ko00330]	Amino acid metabolism
alt76_01800	LacI family transcriptional regulator	NA	NA	K06145	gntR; LacI family transcriptional regulator, gluconate utilization system Gnt-I transcriptional repressor	Transcription factors [BR:ko03000]	Transcription
alt76_01801	hypothetical protein	NA	NA	NA	NA	NA	NA
alt76_01802	gluconokinase	NA	NA	K00851	E2.7.1.12, gntK, idnK; gluconokinase	Pentose phosphate pathway [PATH:ko00030]	Carbohydrate metabolism
alt76_01803	gluconate transporter	NA	NA	K06157	idnT; Gnt-II system L-idonate transporter	Transporters [BR:ko02000]	Membrane transport
alt76_01804	hypothetical protein	NA	NA	NA	NA	NA	NA
alt76_01805	Fur family ferric uptake regulator	NA	NA	K03711	fur; Fur family transcriptional regulator, ferric uptake regulator	Transcription factors [BR:ko03000]	Transcription
alt76_01806	methyl-accepting chemotaxis protein	NA	NA	K03406	mcp; methyl-accepting chemotaxis protein	Bacterial motility proteins [BR:ko02035]	Cell motility
alt76_01807	flavodoxin I	NA	NA	K03839	fldA, nifF, isiB; flavodoxin I	Energy metabolism	Metabolism
alt76_01808	uncharacterized protein DUF2788	NA	NA	NA	NA	NA	NA
alt76_01809	esterase	NA	NA	K01175	ybfF; esterase	Others	Metabolism
alt76_01810	DNA-binding protein H-NS	NA	NA	K03746	hns; DNA-binding protein H-NS	Chromosome and associated proteins [BR:ko03036]	Replication and repair
alt76_01811	electron-transferring-flavoprotein dehydrogenase	NA	NA	K00311	ETFDH; electron-transferring-flavoprotein dehydrogenase	Energy metabolism	Metabolism
alt76_01812	electron transfer flavoprotein beta subunit	NA	NA	K03521	fixA, etfB; electron transfer flavoprotein beta subunit	Energy metabolism	Metabolism
alt76_01813	electron transfer flavoprotein alpha subunit apoprotein	NA	NA	K03522	fixB, etfA; electron transfer flavoprotein alpha subunit	Exosome [BR:ko04147]	Transport and catabolism
alt76_01814	predicted carbohydrate-binding protein with CBM48	NA	NA	NA	NA	NA	NA
alt76_01815	RND family efflux transporter MFP subunit	NA	NA	NA	NA	NA	NA
alt76_01816	multidrug efflux pump subunit AcrB	NA	NA	NA	NA	NA	NA
alt76_01817	hypothetical protein	NA	NA	NA	NA	NA	NA
alt76_01818	iron complex outermembrane receptor protein	NA	NA	NA	NA	NA	NA
alt76_01819	AraC family transcriptional regulator with amidase-like domain	NA	NA	NA	NA	NA	NA
alt76_01820	butyryl-CoA dehydrogenase	NA	NA	K00248	ACADS, bcd; butyryl-CoA dehydrogenase	Butanoate metabolism [PATH:ko00650]	Carbohydrate metabolism
alt76_01821	NAD(P)-dependent dehydrogenase (short-subunit alcohol dehydrogenase family)	NA	NA	K19548	bacC; dihydroanticapsin dehydrogenase	KEGG modules in global maps only	Enzyme families
alt76_01822	NAD(P)-dependent dehydrogenase (short-subunit alcohol dehydrogenase family)	NA	NA	NA	NA	NA	NA
alt76_01823	hypothetical protein	NA	NA	K09768	K09768; uncharacterized protein	Function unknown	Poorly characterized
alt76_01824	aspartate aminotransferase	NA	NA	K00813	aspC; aspartate aminotransferase	Amino acid related enzymes [BR:ko01007]	Amino acid metabolism
alt76_01825	uncharacterized protein with NRDE domain	NA	NA	NA	NA	NA	NA
alt76_01826	acyltransferase-like protein	NA	NA	NA	NA	NA	NA
alt76_01827	cystathionine gamma-synthase	NA	NA	K01760	metC; cystathionine beta-lyase	Selenocompound metabolism [PATH:ko00450]	Metabolism of other amino acids
alt76_01828	FMN-dependent NADH-azoreductase	NA	NA	K01118	acpD, azoR; FMN-dependent NADH-azoreductase	Others	Metabolism
alt76_01829	dipeptidyl aminopeptidase/acylaminoacyl peptidase	NA	NA	NA	NA	NA	NA	MER0247937	gamma-glutamyltransferase 1 (bacterial-type)	0.0e+00
alt76_01830	rhomboid family GlyGly-CTERM serine protease	NA	NA	NA	NA	NA	NA
alt76_01831	enoyl-CoA hydratase/carnithine racemase	NA	NA	K13239	PECI; peroxisomal 3,2-trans-enoyl-CoA isomerase	Fatty acid degradation [PATH:ko00071]	Lipid metabolism
alt76_01832	gamma-glutamyltransferase 1	NA	NA	K00681	ggt; gamma-glutamyltranspeptidase / glutathione hydrolase	Glutathione metabolism [PATH:ko00480]	Metabolism of other amino acids
alt76_01833	hypothetical protein	NA	NA	NA	NA	NA	NA
alt76_01834	cysteine synthase	NA	NA	K01738	cysK; cysteine synthase A	Cysteine and methionine metabolism [PATH:ko00270]	Amino acid metabolism
alt76_01835	MoxR-like ATPase	NA	NA	NA	NA	NA	NA
alt76_01836	hypothetical protein	NA	NA	K09989	K09989; uncharacterized protein	Function unknown	Poorly characterized
alt76_01837	molybdenum cofactor cytidylyltransferase	NA	NA	NA	NA	NA	NA
alt76_01838	MATE family multidrug resistance protein	NA	NA	K03327	TC.MATE, SLC47A, norM, mdtK, dinF; multidrug resistance protein, MATE family	Transporters [BR:ko02000]	Membrane transport
alt76_01839	molybdopterin molybdochelatase	NA	NA	K03750	moeA; molybdopterin molybdotransferase	Folate biosynthesis [PATH:ko00790]	Metabolism of cofactors and vitamins
alt76_01840	sucrose phosphorylase	GH13_18	1.7e-83	K22597	NA	NA	NA
alt76_01841	glucosyl-3-phosphoglycerate synthase	NA	NA	NA	NA	NA	NA
alt76_01842	mannosyl-3-phosphoglycerate phosphatase	NA	NA	K07026	E3.1.3.70; mannosyl-3-phosphoglycerate phosphatase	Fructose and mannose metabolism [PATH:ko00051]	Carbohydrate metabolism
alt76_01843	D-glycerate 3-kinase	NA	NA	K15918	GLYK; D-glycerate 3-kinase	Glycine, serine and threonine metabolism [PATH:ko00260]	Amino acid metabolism
alt76_01844	tRNA (mo5U34)-methyltransferase	NA	NA	K15257	cmoB; tRNA (mo5U34)-methyltransferase	Transfer RNA biogenesis [BR:ko03016]	Translation
alt76_01845	tRNA (cmo5U34)-methyltransferase	NA	NA	K15256	cmoA; tRNA (cmo5U34)-methyltransferase	Transfer RNA biogenesis [BR:ko03016]	Translation
alt76_01846	LuxR family two component transcriptional regulator	NA	NA	NA	NA	NA	NA
alt76_01847	acyl-CoA dehydrogenase	NA	NA	K06445	fadE; acyl-CoA dehydrogenase	Fatty acid degradation [PATH:ko00071]	Lipid metabolism
alt76_01848	uncharacterized protein DUF3108	NA	NA	NA	NA	NA	NA
alt76_01849	formyltetrahydrofolate-dependent phosphoribosylglycinamide formyltransferase	NA	NA	K11175	purN; phosphoribosylglycinamide formyltransferase 1	One carbon pool by folate [PATH:ko00670]	Metabolism of cofactors and vitamins
alt76_01850	phosphoribosylformylglycinamidine cyclo-ligase	NA	NA	K01933	purM; phosphoribosylformylglycinamidine cyclo-ligase	Purine metabolism [PATH:ko00230]	Nucleotide metabolism
alt76_01851	hypothetical protein	NA	NA	K09938	K09938; uncharacterized protein	Function unknown	Poorly characterized
alt76_01852	regulatory inactivation of DnaA Hda protein	NA	NA	K10763	hda; DnaA-homolog protein	DNA replication proteins [BR:ko03032]	Replication and repair
alt76_01853	hypothetical protein	NA	NA	NA	NA	NA	NA
alt76_01854	uncharacterized membrane protein	NA	NA	NA	NA	NA	NA
alt76_01855	NAD(P)H dehydrogenase (quinone)	AA6	2e-41	K03809	wrbA; NAD(P)H dehydrogenase (quinone)	Ubiquinone and other terpenoid-quinone biosynthesis [PATH:ko00130]	Metabolism of cofactors and vitamins
alt76_01856	arsenate reductase	NA	NA	K00537	ARSC1, arsC; arsenate reductase	Others	Metabolism
alt76_01857	hypothetical protein	NA	NA	NA	NA	NA	NA
alt76_01858	thiol-disulfide isomerase/thioredoxin	NA	NA	NA	NA	NA	NA
alt76_01859	predicted Zn-dependent protease	NA	NA	K01423	NA	NA	NA
alt76_01860	putative permease	NA	NA	K03548	perM; putative permease	Transporters [BR:ko02000]	Membrane transport
alt76_01861	peroxiredoxin Q/BCP	NA	NA	K03564	BCP, PRXQ, DOT5; peroxiredoxin Q/BCP	Protein folding and associated processing	Genetic information processing
alt76_01862	glycine cleavage system transcriptional repressor	NA	NA	K03567	gcvR; glycine cleavage system transcriptional repressor	Biofilm formation - Escherichia coli [PATH:ko02026]	Cellular community - prokaryotes
alt76_01863	dihydrodipicolinate synthase	NA	NA	K01714	dapA; 4-hydroxy-tetrahydrodipicolinate synthase	Lysine biosynthesis [PATH:ko00300]	Amino acid metabolism
alt76_01864	Beta-barrel assembly machine subunit BamC	NA	NA	K07287	bamC; outer membrane protein assembly factor BamC	Transporters [BR:ko02000]	Membrane transport
alt76_01865	phosphoribosylaminoimidazole-succinocarboxamide synthase	NA	NA	K01923	purC; phosphoribosylaminoimidazole-succinocarboxamide synthase	Purine metabolism [PATH:ko00230]	Nucleotide metabolism
alt76_01866	threonine/homoserine efflux transporter RhtA	NA	NA	NA	NA	NA	NA
alt76_01867	hypothetical protein	NA	NA	NA	NA	NA	NA
alt76_01868	iron complex outermembrane receptor protein	NA	NA	K02014	TC.FEV.OM; iron complex outermembrane recepter protein	Transporters [BR:ko02000]	Membrane transport
alt76_01869	ABC-2 type transport system permease protein	NA	NA	NA	NA	NA	NA
alt76_01870	ABC-2 type transport system permease protein	NA	NA	NA	NA	NA	NA
alt76_01871	ABC-2 type transport system ATP-binding protein	NA	NA	K19340	nosF; Cu-processing system ATP-binding protein	Transporters [BR:ko02000]	Membrane transport
alt76_01872	glutathione S-transferase	NA	NA	NA	NA	NA	NA
alt76_01873	hypothetical protein	NA	NA	NA	NA	NA	NA
alt76_01874	transposase IS116/IS110/IS902 family protein	NA	NA	NA	NA	NA	NA
alt76_01875	transposase	NA	NA	NA	NA	NA	NA
alt76_01876	hypothetical protein	NA	NA	NA	NA	NA	NA
alt76_01877	hypothetical protein	NA	NA	NA	NA	NA	NA
alt76_01878	hypothetical protein	NA	NA	NA	NA	NA	NA
alt76_01879	hypothetical protein	NA	NA	NA	NA	NA	NA
alt76_01880	hypothetical protein	NA	NA	NA	NA	NA	NA
alt76_01881	hypothetical protein	NA	NA	NA	NA	NA	NA
alt76_01882	hypothetical protein	NA	NA	NA	NA	NA	NA
alt76_01883	hypothetical protein	NA	NA	NA	NA	NA	NA
alt76_01884	hypothetical protein	NA	NA	NA	NA	NA	NA
alt76_01885	hypothetical protein	NA	NA	NA	NA	NA	NA
alt76_01886	uncharacterized protein DUF4263	NA	NA	NA	NA	NA	NA
alt76_01887	integrase-like protein	NA	NA	NA	NA	NA	NA
alt76_01888	uncharacterized protein DUF4365	NA	NA	NA	NA	NA	NA
alt76_01889	hypothetical protein	NA	NA	NA	NA	NA	NA
alt76_01890	hypothetical protein	NA	NA	NA	NA	NA	NA
alt76_01891	hypothetical protein	NA	NA	NA	NA	NA	NA
alt76_01892	hypothetical protein	NA	NA	NA	NA	NA	NA
alt76_01893	methyltransferase family protein	NA	NA	NA	NA	NA	NA
alt76_01894	hypothetical protein	NA	NA	NA	NA	NA	NA
alt76_01895	acetyltransferase (GNAT) family protein	NA	NA	NA	NA	NA	NA
alt76_01896	hypothetical protein	NA	NA	NA	NA	NA	NA
alt76_01897	hypothetical protein	NA	NA	NA	NA	NA	NA
alt76_01898	MerR family transcriptional regulator	NA	NA	NA	NA	NA	NA
alt76_01899	dihydroflavonol-4-reductase	NA	NA	K00091	E1.1.1.219; dihydroflavonol-4-reductase	Biosynthesis and biodegradation of secondary metabolites	Metabolism
alt76_01900	hypothetical protein	NA	NA	NA	NA	NA	NA
alt76_01901	hypothetical protein	NA	NA	NA	NA	NA	NA
alt76_01902	hypothetical protein	NA	NA	NA	NA	NA	NA
alt76_01903	hypothetical protein	NA	NA	NA	NA	NA	NA
alt76_01904	transposase	NA	NA	NA	NA	NA	NA
alt76_01905	transposase InsO family protein	NA	NA	K07497	K07497; putative transposase	Replication, recombination and repair proteins	Genetic information processing
alt76_01906	uncharacterized protein DUF3916	NA	NA	NA	NA	NA	NA
alt76_01907	hypothetical protein	NA	NA	NA	NA	NA	NA
alt76_01908	acetyltransferase (GNAT) family protein	NA	NA	NA	NA	NA	NA
alt76_01909	uncharacterized protein (DUF1778 family)	NA	NA	NA	NA	NA	NA
alt76_01910	YHYH protein	NA	NA	NA	NA	NA	NA
alt76_01911	hypothetical protein	NA	NA	NA	NA	NA	NA
alt76_01912	spondin N	NA	NA	NA	NA	NA	NA
alt76_01913	hypothetical protein	NA	NA	NA	NA	NA	NA
alt76_01914	DNA-binding response OmpR family regulator	NA	NA	K07658	phoB1, phoP; two-component system, OmpR family, alkaline phosphatase synthesis response regulator PhoP	Two-component system [PATH:ko02020]	Signal transduction
alt76_01915	signal transduction histidine kinase	NA	NA	K07651	resE; two-component system, OmpR family, sensor histidine kinase ResE	Two-component system [PATH:ko02020]	Signal transduction
alt76_01916	ferredoxin	NA	NA	K11107	yfaE; ferredoxin	Energy metabolism	Metabolism
alt76_01917	ribonucleoside-diphosphate reductase class Ia beta subunit	NA	NA	K00526	E1.17.4.1B, nrdB, nrdF; ribonucleoside-diphosphate reductase beta chain	Pyrimidine metabolism [PATH:ko00240]	Nucleotide metabolism
alt76_01918	ribonucleoside-diphosphate reductase class Ia alpha subunit	NA	NA	K00525	E1.17.4.1A, nrdA, nrdE; ribonucleoside-diphosphate reductase alpha chain	Pyrimidine metabolism [PATH:ko00240]	Nucleotide metabolism
alt76_01919	3-demethylubiquinone-9 3-methyltransferase	NA	NA	K00568	ubiG; 2-polyprenyl-6-hydroxyphenyl methylase / 3-demethylubiquinone-9 3-methyltransferase	Ubiquinone and other terpenoid-quinone biosynthesis [PATH:ko00130]	Metabolism of cofactors and vitamins
alt76_01920	DNA gyrase subunit A	NA	NA	K02469	gyrA; DNA gyrase subunit A	DNA repair and recombination proteins [BR:ko03400]	Replication and repair
alt76_01921	phosphoserine aminotransferase	NA	NA	K00831	serC, PSAT1; phosphoserine aminotransferase	Methane metabolism [PATH:ko00680]	Energy metabolism
alt76_01922	3-phosphoshikimate 1-carboxyvinyltransferase	NA	NA	K00800	aroA; 3-phosphoshikimate 1-carboxyvinyltransferase	Phenylalanine, tyrosine and tryptophan biosynthesis [PATH:ko00400]	Amino acid metabolism
alt76_01923	cytidylate kinase	NA	NA	K00945	cmk; CMP/dCMP kinase	Pyrimidine metabolism [PATH:ko00240]	Nucleotide metabolism
alt76_01924	SSU ribosomal protein S1P	NA	NA	K02945	RP-S1, rpsA; small subunit ribosomal protein S1	Ribosome [PATH:ko03010]	Translation
alt76_01925	integration host factor subunit beta	NA	NA	K05788	ihfB, himD; integration host factor subunit beta	Chromosome and associated proteins [BR:ko03036]	Replication and repair
alt76_01926	hypothetical protein	NA	NA	NA	NA	NA	NA
alt76_01927	putative membrane protein	NA	NA	K08992	lapA; lipopolysaccharide assembly protein A	Glycan biosynthesis and metabolism	Metabolism
alt76_01928	lipopolysaccharide biosynthesis regulator YciM	NA	NA	K19804	lapB; lipopolysaccharide assembly protein B	Glycan biosynthesis and metabolism	Metabolism
alt76_01929	orotidine-5'-phosphate decarboxylase	NA	NA	K01591	pyrF; orotidine-5'-phosphate decarboxylase	Pyrimidine metabolism [PATH:ko00240]	Nucleotide metabolism
alt76_01930	L-alanine dehydrogenase	NA	NA	K00259	ald; alanine dehydrogenase	Taurine and hypotaurine metabolism [PATH:ko00430]	Metabolism of other amino acids
alt76_01931	AsnC family transcriptional regulator	NA	NA	K03719	lrp; Lrp/AsnC family transcriptional regulator, leucine-responsive regulatory protein	Chromosome and associated proteins [BR:ko03036]	Replication and repair
alt76_01932	DNA translocase FtsK	NA	NA	K03466	ftsK, spoIIIE; DNA segregation ATPase FtsK/SpoIIIE, S-DNA-T family	Chromosome and associated proteins [BR:ko03036]	Replication and repair
alt76_01933	outer membrane lipoprotein carrier protein	NA	NA	K03634	lolA; outer membrane lipoprotein carrier protein	Membrane and intracellular structural molecules	Cellular processes and signaling
alt76_01934	recombination protein MgsA	NA	NA	K07478	ycaJ; putative ATPase	Replication, recombination and repair proteins	Genetic information processing
alt76_01935	camphor resistance protein CrcB	NA	NA	K06199	crcB, FEX; fluoride exporter	Transporters [BR:ko02000]	Membrane transport
alt76_01936	seryl-tRNA synthetase	NA	NA	K01875	SARS, serS; seryl-tRNA synthetase	Aminoacyl-tRNA biosynthesis [PATH:ko00970]	Translation
alt76_01937	hypothetical protein	NA	NA	NA	NA	NA	NA
alt76_01938	tRNA 2-thiouridine synthesizing protein E	NA	NA	K11179	tusE, dsrC; tRNA 2-thiouridine synthesizing protein E	Transfer RNA biogenesis [BR:ko03016]	Translation
alt76_01939	sulfur transfer complex TusBCD TusB component (DsrH family)	NA	NA	NA	NA	NA	NA
alt76_01940	tRNA 2-thiouridine synthesizing protein C	NA	NA	NA	NA	NA	NA
alt76_01941	tRNA 2-thiouridine synthesizing protein D	NA	NA	K07235	tusD, dsrE; tRNA 2-thiouridine synthesizing protein D	Transfer RNA biogenesis [BR:ko03016]	Translation
alt76_01942	modulator of FtsH protease	NA	NA	K19416	yccA; modulator of FtsH protease	Transporters [BR:ko02000]	Membrane transport
alt76_01944	hypothetical protein	NA	NA	NA	NA	NA	NA
alt76_01946	uncharacterized protein DUF3360	NA	NA	NA	NA	NA	NA
alt76_01948	5-histidylcysteine sulfoxide synthase/putative 4-mercaptohistidine N1-methyltranferase	NA	NA	NA	NA	NA	NA
alt76_01949	cystathionine beta-lyase	NA	NA	NA	NA	NA	NA
alt76_01950	hypothetical protein	NA	NA	K06911	K06911; uncharacterized protein	Function unknown	Poorly characterized
alt76_01951	LuxR family two component transcriptional regulator	NA	NA	K07689	uvrY, gacA, varA; two-component system, NarL family, invasion response regulator UvrY	Biofilm formation - Escherichia coli [PATH:ko02026]	Cellular community - prokaryotes
alt76_01952	excinuclease ABC subunit C	NA	NA	K03703	uvrC; excinuclease ABC subunit C	DNA repair and recombination proteins [BR:ko03400]	Replication and repair
alt76_01953	CDP-diacylglycerol--glycerol-3-phosphate 3-phosphatidyltransferase	NA	NA	K00995	pgsA, PGS1; CDP-diacylglycerol---glycerol-3-phosphate 3-phosphatidyltransferase	Glycerophospholipid metabolism [PATH:ko00564]	Lipid metabolism
alt76_01957	hypothetical protein	NA	NA	NA	NA	NA	NA
alt76_01958	hypothetical protein	NA	NA	NA	NA	NA	NA
alt76_01959	uncharacterized protein DUF4224	NA	NA	NA	NA	NA	NA
alt76_01960	hypothetical protein	NA	NA	NA	NA	NA	NA
alt76_01961	uncharacterized protein DUF2786	NA	NA	NA	NA	NA	NA
alt76_01962	hypothetical protein	NA	NA	NA	NA	NA	NA
alt76_01963	hypothetical protein	NA	NA	NA	NA	NA	NA
alt76_01964	hypothetical protein	NA	NA	NA	NA	NA	NA
alt76_01965	hypothetical protein	NA	NA	NA	NA	NA	NA
alt76_01966	hypothetical protein	NA	NA	NA	NA	NA	NA
alt76_01967	helix-turn-helix protein	NA	NA	NA	NA	NA	NA
alt76_01968	hypothetical protein	NA	NA	NA	NA	NA	NA
alt76_01969	hypothetical protein	NA	NA	NA	NA	NA	NA
alt76_01970	hypothetical protein	NA	NA	NA	NA	NA	NA
alt76_01971	hypothetical protein	NA	NA	K06952	K06952; uncharacterized protein	Function unknown	Poorly characterized
alt76_01972	hypothetical protein	NA	NA	NA	NA	NA	NA
alt76_01973	hypothetical protein	NA	NA	NA	NA	NA	NA
alt76_01974	hypothetical protein	NA	NA	NA	NA	NA	NA
alt76_01975	hypothetical protein	NA	NA	NA	NA	NA	NA
alt76_01976	hypothetical protein	NA	NA	NA	NA	NA	NA
alt76_01977	hypothetical protein	NA	NA	NA	NA	NA	NA
alt76_01978	hypothetical protein	NA	NA	NA	NA	NA	NA
alt76_01979	hypothetical protein	NA	NA	NA	NA	NA	NA
alt76_01980	hypothetical protein	NA	NA	NA	NA	NA	NA
alt76_01981	hypothetical protein	NA	NA	NA	NA	NA	NA
alt76_01982	hypothetical protein	NA	NA	NA	NA	NA	NA
alt76_01983	hypothetical protein	NA	NA	NA	NA	NA	NA
alt76_01984	peptidoglycan L-alanyl-D-glutamate endopeptidase CwlK	NA	NA	NA	NA	NA	NA
alt76_01985	hypothetical protein	NA	NA	NA	NA	NA	NA
alt76_01986	holin family protein (superfamily II)	NA	NA	NA	NA	NA	NA
alt76_01987	hypothetical protein	NA	NA	NA	NA	NA	NA
alt76_01988	phage terminase large subunit GpA-like protein	NA	NA	NA	NA	NA	NA
alt76_01989	hypothetical protein	NA	NA	NA	NA	NA	NA
alt76_01990	lambda family phage portal protein	NA	NA	NA	NA	NA	NA
alt76_01991	HK97 family phage major capsid protein	NA	NA	NA	NA	NA	NA
alt76_01992	hypothetical protein	NA	NA	NA	NA	NA	NA
alt76_01993	hypothetical protein	NA	NA	NA	NA	NA	NA
alt76_01994	hypothetical protein	NA	NA	NA	NA	NA	NA
alt76_01995	minor tail protein U	NA	NA	NA	NA	NA	NA
alt76_01996	phage tail tube protein	NA	NA	NA	NA	NA	NA
alt76_01997	hypothetical protein	NA	NA	NA	NA	NA	NA
alt76_01998	hypothetical protein	NA	NA	NA	NA	NA	NA
alt76_01999	tail length tape measure protein	NA	NA	NA	NA	NA	NA
alt76_02000	hypothetical protein	NA	NA	NA	NA	NA	NA
alt76_02001	hypothetical protein	NA	NA	NA	NA	NA	NA
alt76_02002	fibronectin type III domain protein	NA	NA	NA	NA	NA	NA
alt76_02003	hypothetical protein	NA	NA	NA	NA	NA	NA
alt76_02004	hypothetical protein	NA	NA	NA	NA	NA	NA
alt76_02005	carbohydrate esterase-like sialic acid-specific acetylesterase	NA	NA	NA	NA	NA	NA
alt76_02006	hypothetical protein	NA	NA	NA	NA	NA	NA
alt76_02007	hypothetical protein	NA	NA	K05812	yfiP; DTW domain-containing protein	General function prediction only	Poorly characterized
alt76_02008	thiol peroxidase (atypical 2-Cys peroxiredoxin)	NA	NA	K11065	tpx; thiol peroxidase, atypical 2-Cys peroxiredoxin	Protein folding and associated processing	Genetic information processing
alt76_02009	thiosulfate/3-mercaptopyruvate sulfurtransferase	NA	NA	K01011	TST, MPST, sseA; thiosulfate/3-mercaptopyruvate sulfurtransferase	Cysteine and methionine metabolism [PATH:ko00270]	Amino acid metabolism
alt76_02010	NAD-dependent deacetylase	NA	NA	K12410	npdA; NAD-dependent deacetylase	Metabolism of cofactors and vitamins	Metabolism
alt76_02011	threonine/homoserine/homoserine lactone efflux protein	NA	NA	K05835	rhtC; threonine efflux protein	Transporters [BR:ko02000]	Membrane transport
alt76_02012	hypothetical protein	NA	NA	NA	NA	NA	NA
alt76_02013	Bax protein	GH73	9.5e-21	K03796	bax; Bax protein	General function prediction only	Poorly characterized
alt76_02014	DUF2987 family protein	NA	NA	NA	NA	NA	NA
alt76_02015	NTE family protein	NA	NA	K07001	K07001; NTE family protein	General function prediction only	Poorly characterized
alt76_02016	tRNA s(2)C-32 sulfurtransferase	NA	NA	K14058	ttcA; tRNA 2-thiocytidine biosynthesis protein TtcA	Transfer RNA biogenesis [BR:ko03016]	Translation
alt76_02017	universal stress protein E	NA	NA	K14055	uspE; universal stress protein E	Signal transduction mechanisms	Cellular processes and signaling
alt76_02018	CRP/FNR family transcriptional regulator	NA	NA	K01420	fnr; CRP/FNR family transcriptional regulator, anaerobic regulatory protein	Transcription factors [BR:ko03000]	Transcription
alt76_02019	hypothetical protein	NA	NA	K09792	K09792; uncharacterized protein	Function unknown	Poorly characterized
alt76_02020	cbb3-type cytochrome oxidase maturation protein	NA	NA	NA	NA	NA	NA
alt76_02021	Cu2+-exporting ATPase	NA	NA	K01533	copB; Cu2+-exporting ATPase	Energy metabolism	Metabolism
alt76_02022	hypothetical protein	NA	NA	K09926	K09926; uncharacterized protein	Function unknown	Poorly characterized
alt76_02023	cytochrome c oxidase cbb3-type subunit 3	NA	NA	K00406	ccoP; cytochrome c oxidase cbb3-type subunit III	Oxidative phosphorylation [PATH:ko00190]	Energy metabolism
alt76_02024	cytochrome c oxidase cbb3-type subunit 2	NA	NA	K00405	ccoO; cytochrome c oxidase cbb3-type subunit II	Oxidative phosphorylation [PATH:ko00190]	Energy metabolism
alt76_02025	cytochrome c oxidase cbb3-type subunit 1	NA	NA	K00404	ccoN; cytochrome c oxidase cbb3-type subunit I	Two-component system [PATH:ko02020]	Signal transduction
alt76_02026	hypothetical protein	NA	NA	NA	NA	NA	NA
alt76_02027	bacterioferritin	NA	NA	K03594	bfr; bacterioferritin	Porphyrin and chlorophyll metabolism [PATH:ko00860]	Metabolism of cofactors and vitamins
alt76_02028	bacterioferritin	NA	NA	K03594	bfr; bacterioferritin	Porphyrin and chlorophyll metabolism [PATH:ko00860]	Metabolism of cofactors and vitamins
alt76_02029	transporter (CPA2 family)	NA	NA	NA	NA	NA	NA
alt76_02030	glutamate synthase domain-containing protein 2	NA	NA	NA	NA	NA	NA
alt76_02031	cytochrome c	NA	NA	NA	NA	NA	NA
alt76_02032	universal stress protein A	NA	NA	K06149	uspA; universal stress protein A	Signal transduction mechanisms	Cellular processes and signaling
alt76_02033	diacylglycerol kinase-like protein	NA	NA	NA	NA	NA	NA
alt76_02034	hypothetical protein	NA	NA	NA	NA	NA	NA
alt76_02035	site-specific recombinase XerD	NA	NA	NA	NA	NA	NA
alt76_02036	hypothetical protein	NA	NA	NA	NA	NA	NA
alt76_02037	uncharacterized membrane protein	NA	NA	NA	NA	NA	NA
alt76_02038	deoxyribodipyrimidine photolyase-related protein	NA	NA	K06876	K06876; deoxyribodipyrimidine photolyase-related protein	General function prediction only	Poorly characterized
alt76_02039	deoxyribodipyrimidine photo-lyase	NA	NA	K01669	phrB; deoxyribodipyrimidine photo-lyase	DNA repair and recombination proteins [BR:ko03400]	Replication and repair
alt76_02040	deoxyribodipyrimidine photo-lyase (single-stranded DNA-specific)	NA	NA	K01669	phrB; deoxyribodipyrimidine photo-lyase	DNA repair and recombination proteins [BR:ko03400]	Replication and repair
alt76_02041	hypothetical protein	NA	NA	NA	NA	NA	NA
alt76_02042	3-hydroxydecanoyl-[acyl-carrier-protein] dehydratase	NA	NA	K01716	fabA; 3-hydroxyacyl-[acyl-carrier protein] dehydratase / trans-2-decenoyl-[acyl-carrier protein] isomerase	Fatty acid biosynthesis [PATH:ko00061]	Lipid metabolism
alt76_02043	ribosome modulation factor	NA	NA	K03812	rmf; ribosome modulation factor	Ribosome biogenesis [BR:ko03009]	Translation
alt76_02044	predicted secreted protein	NA	NA	NA	NA	NA	NA
alt76_02045	ATP-binding cassette subfamily F protein uup	NA	NA	K15738	uup; ABC transport system&#160;ATP-binding/permease protein	Transporters [BR:ko02000]	Membrane transport
alt76_02046	glutaredoxin-like protein DUF836	NA	NA	NA	NA	NA	NA
alt76_02047	23S rRNA m(2)G-2445 methyltransferase	NA	NA	K12297	rlmL, rlmK; 23S rRNA (guanine2445-N2)-methyltransferase / 23S rRNA (guanine2069-N7)-methyltransferase	Ribosome biogenesis [BR:ko03009]	Translation
alt76_02048	dihydroorotate oxidase A	NA	NA	K00254	DHODH, pyrD; dihydroorotate dehydrogenase	Pyrimidine metabolism [PATH:ko00240]	Nucleotide metabolism
alt76_02049	glutamate dehydrogenase (NAD)	NA	NA	K15371	GDH2; glutamate dehydrogenase	Nitrogen metabolism [PATH:ko00910]	Energy metabolism
alt76_02050	hypothetical protein	NA	NA	K07003	K07003; uncharacterized protein	Function unknown	Poorly characterized
alt76_02051	photosystem II stability/assembly factor-like uncharacterized protein	NA	NA	NA	NA	NA	NA
alt76_02052	uncharacterized protein DUF1329	NA	NA	NA	NA	NA	NA
alt76_02053	uncharacterized protein DUF1302	NA	NA	NA	NA	NA	NA
alt76_02054	uncharacterized protein DUF2835	NA	NA	NA	NA	NA	NA	MER0248341	family M1 unassigned peptidases	5.9e-295
alt76_02055	aminopeptidase N	NA	NA	K01256	pepN; aminopeptidase N	Peptidases [BR:ko01002]	Enzyme families	MER0248333	C-terminal processing peptidase-1	1.7e-111
[truncated: 2,101 more rows]

## Sheet: Uniques_Alt761_SN2
Strain	Locus Tag	Gene Product Name	Knumber	KEGG_annotation	KEGG_pathway	KEGG_class
Alteromonas sp. 76-1	alt76_00035	calcineurin-like phosphoesterase family protein
Alteromonas sp. 76-1	alt76_00036	putative membrane protein
Alteromonas sp. 76-1	alt76_00088	hypothetical protein
Alteromonas sp. 76-1	alt76_00089	hypothetical protein
Alteromonas sp. 76-1	alt76_00092	RNA polymerase sigma-70 factor (ECF subfamily)
Alteromonas sp. 76-1	alt76_00093	FecR family protein
Alteromonas sp. 76-1	alt76_00094	secretin/TonB-like protein
Alteromonas sp. 76-1	alt76_00095	imidazolonepropionase-like amidohydrolase
Alteromonas sp. 76-1	alt76_00096	imidazolonepropionase-like amidohydrolase
Alteromonas sp. 76-1	alt76_00097	imidazolonepropionase-like amidohydrolase
Alteromonas sp. 76-1	alt76_00098	N-formylglutamate amidohydrolase
Alteromonas sp. 76-1	alt76_00099	electron transfer flavoprotein beta subunit	K03521	fixA, etfB; electron transfer flavoprotein beta subunit	Energy metabolism	Metabolism
Alteromonas sp. 76-1	alt76_00100	electron transfer flavoprotein alpha subunit apoprotein	K03522	fixB, etfA; electron transfer flavoprotein alpha subunit	Exosome [BR:ko04147]	Transport and catabolism
Alteromonas sp. 76-1	alt76_00101	Fe-S oxidoreductase	K21834	dgcB; dimethylglycine catabolism B	General function prediction only	Poorly characterized
Alteromonas sp. 76-1	alt76_00102	2,4-dienoyl-CoA reductase-like NADH-dependent reductase (Old Yellow Enzyme family)	K21833	dgcA; dimethylglycine catabolism A	General function prediction only	Poorly characterized
Alteromonas sp. 76-1	alt76_00103	V4R domain-containing protein
Alteromonas sp. 76-1	alt76_00104	membrane dipeptidase
Alteromonas sp. 76-1	alt76_00105	AraC family transcriptional regulator with amidase-like domain	K21826	gbdR; AraC family transcriptional regulator, glycine betaine-responsive activator	Transcription factors [BR:ko03000]	Transcription
Alteromonas sp. 76-1	alt76_00106	Rieske 2Fe-2S family protein	K00479	gbcA; glycine betaine catabolism A	General function prediction only	Poorly characterized
Alteromonas sp. 76-1	alt76_00107	ferredoxin-NADP reductase	K21832	gbcB; glycine betaine catabolism B	General function prediction only	Poorly characterized
Alteromonas sp. 76-1	alt76_00109	sarcosine oxidase subunit beta	K00303	soxB; sarcosine oxidase, subunit beta	Glycine, serine and threonine metabolism [PATH:ko00260]	Amino acid metabolism
Alteromonas sp. 76-1	alt76_00110	sarcosine oxidase subunit delta	K00304	soxD; sarcosine oxidase, subunit delta	Glycine, serine and threonine metabolism [PATH:ko00260]	Amino acid metabolism
Alteromonas sp. 76-1	alt76_00111	sarcosine oxidase subunit alpha	K00302	soxA; sarcosine oxidase, subunit alpha	Glycine, serine and threonine metabolism [PATH:ko00260]	Amino acid metabolism
Alteromonas sp. 76-1	alt76_00112	sarcosine oxidase subunit gamma	K00305	soxG; sarcosine oxidase, subunit gamma	Glycine, serine and threonine metabolism [PATH:ko00260]	Amino acid metabolism
Alteromonas sp. 76-1	alt76_00113	formyltetrahydrofolate deformylase	K01433	purU; formyltetrahydrofolate deformylase	Glyoxylate and dicarboxylate metabolism [PATH:ko00630]	Carbohydrate metabolism
Alteromonas sp. 76-1	alt76_00114	predicted MFS family arabinose efflux permease
Alteromonas sp. 76-1	alt76_00115	choline-glycine betaine transporter	K02168	betT, betS; choline/glycine/proline betaine transport protein	Transporters [BR:ko02000]	Membrane transport
Alteromonas sp. 76-1	alt76_00116	LysR family glycine cleavage system transcriptional activator	K03566	gcvA; LysR family transcriptional regulator, glycine cleavage system transcriptional activator	Biofilm formation - Escherichia coli [PATH:ko02026]	Cellular community - prokaryotes
Alteromonas sp. 76-1	alt76_00117	3-hydroxyisobutyrate dehydrogenase	K00020	mmsB, HIBADH; 3-hydroxyisobutyrate dehydrogenase	Valine, leucine and isoleucine degradation [PATH:ko00280]	Amino acid metabolism
Alteromonas sp. 76-1	alt76_00118	IclR family transcriptional regulator
Alteromonas sp. 76-1	alt76_00119	lactaldehyde dehydrogenase/glycolaldehyde dehydrogenase	K07248	aldA; lactaldehyde dehydrogenase / glycolaldehyde dehydrogenase	Pyruvate metabolism [PATH:ko00620]	Carbohydrate metabolism
Alteromonas sp. 76-1	alt76_00120	2-dehydro-3-deoxyphosphogalactonate aldolase
Alteromonas sp. 76-1	alt76_00121	choline dehydrogenase	K00108	betA, CHDH; choline dehydrogenase	Glycine, serine and threonine metabolism [PATH:ko00260]	Amino acid metabolism
Alteromonas sp. 76-1	alt76_00122	gamma-glutamyl-gamma-aminobutyraldehyde dehydrogenase	K12254	kauB; 4-guanidinobutyraldehyde dehydrogenase / NAD-dependent aldehyde dehydrogenase	Arginine and proline metabolism [PATH:ko00330]	Amino acid metabolism
Alteromonas sp. 76-1	alt76_00123	outer membrane receptor protein involved in Fe transport
Alteromonas sp. 76-1	alt76_00124	tetratricopeptide repeat protein
Alteromonas sp. 76-1	alt76_00181	diguanylate cyclase (GGDEF)-like protein	K14051	gmr; c-di-GMP phosphodiesterase Gmr	Biofilm formation - Escherichia coli [PATH:ko02026]	Cellular community - prokaryotes
Alteromonas sp. 76-1	alt76_00182	DUF2892 family protein
Alteromonas sp. 76-1	alt76_00186	hypothetical protein
Alteromonas sp. 76-1	alt76_00187	outer membrane receptor protein involved in Fe transport	K16090	fiu; catecholate siderophore receptor	Transporters [BR:ko02000]	Membrane transport
Alteromonas sp. 76-1	alt76_00251	hypothetical protein
Alteromonas sp. 76-1	alt76_00300	Rieske 2Fe-2S family protein
Alteromonas sp. 76-1	alt76_00301	ABC-2 family transporter
Alteromonas sp. 76-1	alt76_00302	ABC-2 type transport system ATP-binding protein	K01990	ABC-2.A; ABC-2 type transport system ATP-binding protein	Transporters [BR:ko02000]	Membrane transport
Alteromonas sp. 76-1	alt76_00303	hypothetical protein
Alteromonas sp. 76-1	alt76_00304	SagB-type dehydrogenase family enzyme
Alteromonas sp. 76-1	alt76_00305	thiazole/oxazole-forming peptide maturase SagD family component	K09136	ycaO; ribosomal protein S12 methylthiotransferase accessory factor	Ribosome biogenesis [BR:ko03009]	Translation
Alteromonas sp. 76-1	alt76_00306	bacteriocin biosynthesis cyclodehydratase domain-containing protein
Alteromonas sp. 76-1	alt76_00307	hypothetical protein
Alteromonas sp. 76-1	alt76_00308	hypothetical protein
Alteromonas sp. 76-1	alt76_00309	NodT family efflux transporter outer membrane factor (OMF) lipoprotein
Alteromonas sp. 76-1	alt76_00310	RND family efflux transporter MFP subunit
Alteromonas sp. 76-1	alt76_00312	DNA-binding response OmpR family regulator
Alteromonas sp. 76-1	alt76_00313	signal transduction histidine kinase
Alteromonas sp. 76-1	alt76_00314	hypothetical protein
Alteromonas sp. 76-1	alt76_00315	aspartyl protease
Alteromonas sp. 76-1	alt76_00316	hypothetical protein
Alteromonas sp. 76-1	alt76_00318	tellurite resistance protein TehA-like permease	K11041	eta; exfoliative toxin A/B	Staphylococcus aureus infection [PATH:ko05150]	Infectious diseases
Alteromonas sp. 76-1	alt76_00467	hypothetical protein
Alteromonas sp. 76-1	alt76_00471	TonB-dependent receptor-like protein
Alteromonas sp. 76-1	alt76_00524	hypothetical protein
Alteromonas sp. 76-1	alt76_00527	hypothetical protein
Alteromonas sp. 76-1	alt76_00528	uncharacterized membrane protein YeiB
Alteromonas sp. 76-1	alt76_00529	hypothetical protein
Alteromonas sp. 76-1	alt76_00530	hypothetical protein
Alteromonas sp. 76-1	alt76_00531	uncharacterized protein DUF4265
Alteromonas sp. 76-1	alt76_00532	mRNA interferase RelE/StbE
Alteromonas sp. 76-1	alt76_00533	hypothetical protein
Alteromonas sp. 76-1	alt76_00536	hypothetical protein
Alteromonas sp. 76-1	alt76_00537	hypothetical protein
Alteromonas sp. 76-1	alt76_00538	hypothetical protein
Alteromonas sp. 76-1	alt76_00539	hypothetical protein
Alteromonas sp. 76-1	alt76_00540	secretory protein of YscJ/FliF family
Alteromonas sp. 76-1	alt76_00541	hypothetical protein
Alteromonas sp. 76-1	alt76_00543	hypothetical protein
Alteromonas sp. 76-1	alt76_00544	hypothetical protein
Alteromonas sp. 76-1	alt76_00546	hypothetical protein
Alteromonas sp. 76-1	alt76_00547	hypothetical protein
Alteromonas sp. 76-1	alt76_00548	hypothetical protein
Alteromonas sp. 76-1	alt76_00549	hypothetical protein
Alteromonas sp. 76-1	alt76_00551	hypothetical protein
Alteromonas sp. 76-1	alt76_00553	hypothetical protein
Alteromonas sp. 76-1	alt76_00554	hypothetical protein
Alteromonas sp. 76-1	alt76_00556	hypothetical protein
Alteromonas sp. 76-1	alt76_00781	dipeptidyl aminopeptidase/acylaminoacyl peptidase
Alteromonas sp. 76-1	alt76_00800	SP family sugar:H+ symporter-like MFS transporter	K08139	HXT; MFS transporter, SP family, sugar:H+ symporter	Meiosis - yeast [PATH:ko04113]	Cell growth and death
Alteromonas sp. 76-1	alt76_00801	AraC family transcriptional regulator	K02529	lacI, galR; LacI family transcriptional regulator	Transcription factors [BR:ko03000]	Transcription
Alteromonas sp. 76-1	alt76_00802	xylulokinase	K00854	xylB, XYLB; xylulokinase	Pentose and glucuronate interconversions [PATH:ko00040]	Carbohydrate metabolism
Alteromonas sp. 76-1	alt76_00803	D-xylose isomerase	K01805	xylA; xylose isomerase	Fructose and mannose metabolism [PATH:ko00051]	Carbohydrate metabolism
Alteromonas sp. 76-1	alt76_00804	non-processive endocellulase	K01179	E3.2.1.4; endoglucanase	Starch and sucrose metabolism [PATH:ko00500]	Carbohydrate metabolism
Alteromonas sp. 76-1	alt76_00805	AraC family transcriptional regulator
Alteromonas sp. 76-1	alt76_00806	tryptophan halogenase
Alteromonas sp. 76-1	alt76_00807	TonB-dependent receptor
Alteromonas sp. 76-1	alt76_00808	beta-glucosidase	K15920	XYL4; beta-D-xylosidase 4	Amino sugar and nucleotide sugar metabolism [PATH:ko00520]	Carbohydrate metabolism
Alteromonas sp. 76-1	alt76_00818	hypothetical protein
Alteromonas sp. 76-1	alt76_00824	calcineurin-like phosphoesterase family protein
Alteromonas sp. 76-1	alt76_00825	calcium-dependent phosphoinositide phospholipase C
Alteromonas sp. 76-1	alt76_00826	TonB-dependent receptor
Alteromonas sp. 76-1	alt76_00827	TonB-dependent receptor
Alteromonas sp. 76-1	alt76_00828	FecR family protein
Alteromonas sp. 76-1	alt76_00829	RNA polymerase sigma-70 factor (ECF subfamily)
Alteromonas sp. 76-1	alt76_00862	mannose-6-phosphate isomerase	K01809	manA, MPI; mannose-6-phosphate isomerase	Amino sugar and nucleotide sugar metabolism [PATH:ko00520]	Carbohydrate metabolism
Alteromonas sp. 76-1	alt76_00863	Mn2+/Fe2+ NRAMP family transporter	K03322	mntH; manganese transport protein	Transporters [BR:ko02000]	Membrane transport
Alteromonas sp. 76-1	alt76_00864	D-mannonate dehydratase	K01686	uxuA; mannonate dehydratase	Pentose and glucuronate interconversions [PATH:ko00040]	Carbohydrate metabolism
Alteromonas sp. 76-1	alt76_00865	fructuronate reductase	K00040	uxuB; fructuronate reductase	Pentose and glucuronate interconversions [PATH:ko00040]	Carbohydrate metabolism
Alteromonas sp. 76-1	alt76_00874	hypothetical protein
Alteromonas sp. 76-1	alt76_00914	hypothetical protein
Alteromonas sp. 76-1	alt76_00915	hypothetical protein
Alteromonas sp. 76-1	alt76_00916	DnaJ-like protein
Alteromonas sp. 76-1	alt76_00917	hypothetical protein
Alteromonas sp. 76-1	alt76_00918	hypothetical protein
Alteromonas sp. 76-1	alt76_00919	hypothetical protein
Alteromonas sp. 76-1	alt76_00920	hypothetical protein
Alteromonas sp. 76-1	alt76_00921	hypothetical protein
Alteromonas sp. 76-1	alt76_00922	hypothetical protein
Alteromonas sp. 76-1	alt76_00923	5'(3')-deoxyribonucleotidase	K01081	E3.1.3.5; 5'-nucleotidase	Nicotinate and nicotinamide metabolism [PATH:ko00760]	Metabolism of cofactors and vitamins
Alteromonas sp. 76-1	alt76_00924	hypothetical protein
Alteromonas sp. 76-1	alt76_00925	hypothetical protein
Alteromonas sp. 76-1	alt76_00926	hypothetical protein	K06915	K06915; uncharacterized protein	Function unknown	Poorly characterized
Alteromonas sp. 76-1	alt76_00927	hypothetical protein
Alteromonas sp. 76-1	alt76_00928	hypothetical protein
Alteromonas sp. 76-1	alt76_00929	hypothetical protein
Alteromonas sp. 76-1	alt76_00930	hypothetical protein
Alteromonas sp. 76-1	alt76_00931	TniQ protein
Alteromonas sp. 76-1	alt76_00932	TniB protein
Alteromonas sp. 76-1	alt76_00933	integrase-like protein
Alteromonas sp. 76-1	alt76_00934	hypothetical protein
Alteromonas sp. 76-1	alt76_00935	hypothetical protein
Alteromonas sp. 76-1	alt76_00936	uncharacterized protein DUF1524
Alteromonas sp. 76-1	alt76_00937	hypothetical protein
Alteromonas sp. 76-1	alt76_00938	hypothetical protein
Alteromonas sp. 76-1	alt76_00939	HEPN domain-containing protein
Alteromonas sp. 76-1	alt76_00940	hypothetical protein
Alteromonas sp. 76-1	alt76_00941	hypothetical protein
Alteromonas sp. 76-1	alt76_00942	hypothetical protein
Alteromonas sp. 76-1	alt76_00943	T5orf172 domain-containing protein
Alteromonas sp. 76-1	alt76_00944	hypothetical protein
Alteromonas sp. 76-1	alt76_00946	hypothetical protein
Alteromonas sp. 76-1	alt76_01016	hypothetical protein
Alteromonas sp. 76-1	alt76_01017	hypothetical protein
Alteromonas sp. 76-1	alt76_01018	NAD dependent epimerase/dehydratase	K01784	galE, GALE; UDP-glucose 4-epimerase	Amino sugar and nucleotide sugar metabolism [PATH:ko00520]	Carbohydrate metabolism
Alteromonas sp. 76-1	alt76_01019	aminotransferase in exopolysaccharide biosynthesis	K19430	epsN; pyridoxal phosphate-dependent aminotransferase EpsN	Glycan biosynthesis and metabolism	Metabolism
Alteromonas sp. 76-1	alt76_01020	WbqC-like protein
Alteromonas sp. 76-1	alt76_01021	methyltransferase family protein
Alteromonas sp. 76-1	alt76_01022	GDP/UDP-N,N'-diacetylbacillosamine 2-epimerase (hydrolysing)	K12409	GNE; bifunctional UDP-N-acetylglucosamine 2-epimerase / N-acetylmannosamine kinase	Amino sugar and nucleotide sugar metabolism [PATH:ko00520]	Carbohydrate metabolism
Alteromonas sp. 76-1	alt76_01023	protoporphyrinogen oxidase
Alteromonas sp. 76-1	alt76_01024	dTDP-4-amino-4,6-dideoxygalactose transaminase
Alteromonas sp. 76-1	alt76_01025	LmbE family N-acetylglucosaminyl deacetylase	K01463	bshB1; N-acetylglucosamine malate deacetylase 1	Carbohydrate metabolism	Metabolism
Alteromonas sp. 76-1	alt76_01026	sulfotransferase family protein
Alteromonas sp. 76-1	alt76_01027	N-acetylneuraminate synthase	K01654	E2.5.1.56, neuB; N-acetylneuraminate synthase	Amino sugar and nucleotide sugar metabolism [PATH:ko00520]	Carbohydrate metabolism
Alteromonas sp. 76-1	alt76_01028	UDP-perosamine 4-acetyltransferase	K19429	epsM; acetyltransferase EpsM	Glycan biosynthesis and metabolism	Metabolism
Alteromonas sp. 76-1	alt76_01029	CBS domain protein	K00966	GMPP; mannose-1-phosphate guanylyltransferase	Amino sugar and nucleotide sugar metabolism [PATH:ko00520]	Carbohydrate metabolism
Alteromonas sp. 76-1	alt76_01030	N-acylneuraminate cytidylyltransferase/CMP-N,N'-diacetyllegionaminic acid synthase	K00983	neuA; N-acylneuraminate cytidylyltransferase	Amino sugar and nucleotide sugar metabolism [PATH:ko00520]	Carbohydrate metabolism
Alteromonas sp. 76-1	alt76_01031	hypothetical protein
Alteromonas sp. 76-1	alt76_01091	hypothetical protein
Alteromonas sp. 76-1	alt76_01114	TonB-dependent receptor-like protein
Alteromonas sp. 76-1	alt76_01115	hypothetical protein
Alteromonas sp. 76-1	alt76_01116	putative 2-oxoglutarate-Fe(II)-dependent oxygenase superfamily protein
Alteromonas sp. 76-1	alt76_01117	2-oxoglutarate-Fe(II)-dependent oxygenase superfamily protein
Alteromonas sp. 76-1	alt76_01137	hypothetical protein
Alteromonas sp. 76-1	alt76_01139	nucleotidyltransferase AbiEii toxin of type IV toxin-antitoxin system
Alteromonas sp. 76-1	alt76_01158	hypothetical protein
Alteromonas sp. 76-1	alt76_01189	hypothetical protein
Alteromonas sp. 76-1	alt76_01242	hypothetical protein
Alteromonas sp. 76-1	alt76_01243	hypothetical protein
Alteromonas sp. 76-1	alt76_01264	methyl-accepting chemotaxis protein
Alteromonas sp. 76-1	alt76_01312	hypothetical protein
Alteromonas sp. 76-1	alt76_01313	hypothetical protein
Alteromonas sp. 76-1	alt76_01350	hypothetical protein
Alteromonas sp. 76-1	alt76_01424	hypothetical protein
Alteromonas sp. 76-1	alt76_01508	hypothetical protein
Alteromonas sp. 76-1	alt76_01529	translation initiation factor 3 (bIF-3)	K02520	infC, MTIF3; translation initiation factor IF-3	Translation factors [BR:ko03012]	Translation
Alteromonas sp. 76-1	alt76_01530	LSU ribosomal protein L35P	K02916	RP-L35, MRPL35, rpmI; large subunit ribosomal protein L35	Ribosome [BR:ko03011]	Translation
Alteromonas sp. 76-1	alt76_01532	peptidoglycan/LPS O-acetylase OafA/YrhL
Alteromonas sp. 76-1	alt76_01547	glycosyl transferase family 2	K07011	K07011; uncharacterized protein	Function unknown	Poorly characterized
Alteromonas sp. 76-1	alt76_01549	colanic acid/amylovoran biosynthesis glycosyltransferase	K16703	wcaL, amsK; colanic acid/amylovoran biosynthesis glycosyltransferase	Glycosyltransferases [BR:ko01003]	Glycan biosynthesis and metabolism
Alteromonas sp. 76-1	alt76_01550	predicted secreted protein with PEP-CTERM sorting signal
Alteromonas sp. 76-1	alt76_01551	sulfotransferase family protein
Alteromonas sp. 76-1	alt76_01552	parallel beta helix pectate lyase-like protein
Alteromonas sp. 76-1	alt76_01553	glycosyltransferase involved in cell wall biosynthesis	K19002	mgs, bgsB; 1,2-diacylglycerol 3-alpha-glucosyltransferase	Glycosyltransferases [BR:ko01003]	Glycan biosynthesis and metabolism
Alteromonas sp. 76-1	alt76_01554	glycosyltransferase involved in cell wall biosynthesis
Alteromonas sp. 76-1	alt76_01555	peptidoglycan/LPS O-acetylase OafA/YrhL
Alteromonas sp. 76-1	alt76_01556	peptidoglycan/LPS O-acetylase OafA/YrhL
Alteromonas sp. 76-1	alt76_01557	sulfotransferase family protein
Alteromonas sp. 76-1	alt76_01631	DNA-binding transcriptional LysR family regulator
Alteromonas sp. 76-1	alt76_01632	cyanate permease
Alteromonas sp. 76-1	alt76_01672	WD40 repeat protein	K03641	tolB; TolB protein	Transporters [BR:ko02000]	Membrane transport
Alteromonas sp. 76-1	alt76_01673	TonB-dependent receptor-like protein
Alteromonas sp. 76-1	alt76_01674	FecR family protein
Alteromonas sp. 76-1	alt76_01675	RNA polymerase sigma-70 factor (ECF subfamily)	K03088	SIG3.2, rpoE; RNA polymerase sigma-70 factor, ECF subfamily	Transcription machinery [BR:ko03021]	Transcription
Alteromonas sp. 76-1	alt76_01692	hypothetical protein
Alteromonas sp. 76-1	alt76_01697	glucans biosynthesis protein	K03670	mdoG; periplasmic glucans biosynthesis protein	Inorganic ion transport and metabolism	Cellular processes and signaling
Alteromonas sp. 76-1	alt76_01769	light-regulated signal transduction histidine kinase (bacteriophytochrome)
Alteromonas sp. 76-1	alt76_01770	PAS domain S-box-containing protein/diguanylate cyclase (GGDEF)-like protein	K14051	gmr; c-di-GMP phosphodiesterase Gmr	Biofilm formation - Escherichia coli [PATH:ko02026]	Cellular community - prokaryotes
Alteromonas sp. 76-1	alt76_01776	hypothetical protein
Alteromonas sp. 76-1	alt76_01777	hypothetical protein
Alteromonas sp. 76-1	alt76_01778	DNA sulfur modification protein DndD
Alteromonas sp. 76-1	alt76_01779	putative transposase	K07497	K07497; putative transposase	Replication, recombination and repair proteins	Genetic information processing
Alteromonas sp. 76-1	alt76_01787	5'-deoxynucleotidase	K08722	yfbR; 5'-deoxynucleotidase	Pyrimidine metabolism [PATH:ko00240]	Nucleotide metabolism
Alteromonas sp. 76-1	alt76_01801	hypothetical protein
Alteromonas sp. 76-1	alt76_01804	hypothetical protein
Alteromonas sp. 76-1	alt76_01873	hypothetical protein
Alteromonas sp. 76-1	alt76_01876	hypothetical protein
Alteromonas sp. 76-1	alt76_01877	hypothetical protein
Alteromonas sp. 76-1	alt76_01878	hypothetical protein
Alteromonas sp. 76-1	alt76_01879	hypothetical protein
Alteromonas sp. 76-1	alt76_01880	hypothetical protein
Alteromonas sp. 76-1	alt76_01881	hypothetical protein
Alteromonas sp. 76-1	alt76_01882	hypothetical protein
Alteromonas sp. 76-1	alt76_01885	hypothetical protein
Alteromonas sp. 76-1	alt76_01886	uncharacterized protein DUF4263
Alteromonas sp. 76-1	alt76_01887	integrase-like protein
Alteromonas sp. 76-1	alt76_01888	uncharacterized protein DUF4365
Alteromonas sp. 76-1	alt76_01889	hypothetical protein
Alteromonas sp. 76-1	alt76_01890	hypothetical protein
Alteromonas sp. 76-1	alt76_01891	hypothetical protein
Alteromonas sp. 76-1	alt76_01892	hypothetical protein
Alteromonas sp. 76-1	alt76_01893	methyltransferase family protein
Alteromonas sp. 76-1	alt76_01894	hypothetical protein
Alteromonas sp. 76-1	alt76_01895	acetyltransferase (GNAT) family protein
Alteromonas sp. 76-1	alt76_01896	hypothetical protein
Alteromonas sp. 76-1	alt76_01897	hypothetical protein
Alteromonas sp. 76-1	alt76_01900	hypothetical protein
Alteromonas sp. 76-1	alt76_01901	hypothetical protein
Alteromonas sp. 76-1	alt76_01903	hypothetical protein
Alteromonas sp. 76-1	alt76_01904	transposase
Alteromonas sp. 76-1	alt76_01905	transposase InsO family protein	K07497	K07497; putative transposase	Replication, recombination and repair proteins	Genetic information processing
Alteromonas sp. 76-1	alt76_01906	uncharacterized protein DUF3916
Alteromonas sp. 76-1	alt76_01944	hypothetical protein
Alteromonas sp. 76-1	alt76_01957	hypothetical protein
Alteromonas sp. 76-1	alt76_01958	hypothetical protein
Alteromonas sp. 76-1	alt76_01959	uncharacterized protein DUF4224
Alteromonas sp. 76-1	alt76_01960	hypothetical protein
Alteromonas sp. 76-1	alt76_01961	uncharacterized protein DUF2786
Alteromonas sp. 76-1	alt76_01962	hypothetical protein
Alteromonas sp. 76-1	alt76_01963	hypothetical protein
Alteromonas sp. 76-1	alt76_01964	hypothetical protein
Alteromonas sp. 76-1	alt76_01965	hypothetical protein
Alteromonas sp. 76-1	alt76_01966	hypothetical protein
Alteromonas sp. 76-1	alt76_01967	helix-turn-helix protein
Alteromonas sp. 76-1	alt76_01968	hypothetical protein
Alteromonas sp. 76-1	alt76_01969	hypothetical protein
Alteromonas sp. 76-1	alt76_01970	hypothetical protein
Alteromonas sp. 76-1	alt76_01971	hypothetical protein	K06952	K06952; uncharacterized protein	Function unknown	Poorly characterized
Alteromonas sp. 76-1	alt76_01972	hypothetical protein
Alteromonas sp. 76-1	alt76_01973	hypothetical protein
Alteromonas sp. 76-1	alt76_01974	hypothetical protein
Alteromonas sp. 76-1	alt76_01975	hypothetical protein
Alteromonas sp. 76-1	alt76_01976	hypothetical protein
Alteromonas sp. 76-1	alt76_01977	hypothetical protein
Alteromonas sp. 76-1	alt76_01978	hypothetical protein
Alteromonas sp. 76-1	alt76_01979	hypothetical protein
Alteromonas sp. 76-1	alt76_01980	hypothetical protein
Alteromonas sp. 76-1	alt76_01981	hypothetical protein
Alteromonas sp. 76-1	alt76_01982	hypothetical protein
Alteromonas sp. 76-1	alt76_01983	hypothetical protein
Alteromonas sp. 76-1	alt76_01984	peptidoglycan L-alanyl-D-glutamate endopeptidase CwlK
Alteromonas sp. 76-1	alt76_01985	hypothetical protein
Alteromonas sp. 76-1	alt76_01986	holin family protein (superfamily II)
Alteromonas sp. 76-1	alt76_01987	hypothetical protein
Alteromonas sp. 76-1	alt76_01988	phage terminase large subunit GpA-like protein
Alteromonas sp. 76-1	alt76_01989	hypothetical protein
Alteromonas sp. 76-1	alt76_01990	lambda family phage portal protein
Alteromonas sp. 76-1	alt76_01991	HK97 family phage major capsid protein
Alteromonas sp. 76-1	alt76_01992	hypothetical protein
Alteromonas sp. 76-1	alt76_01993	hypothetical protein
Alteromonas sp. 76-1	alt76_01994	hypothetical protein
Alteromonas sp. 76-1	alt76_01995	minor tail protein U
Alteromonas sp. 76-1	alt76_01996	phage tail tube protein
Alteromonas sp. 76-1	alt76_01997	hypothetical protein
Alteromonas sp. 76-1	alt76_01998	hypothetical protein
Alteromonas sp. 76-1	alt76_01999	tail length tape measure protein
Alteromonas sp. 76-1	alt76_02000	hypothetical protein
Alteromonas sp. 76-1	alt76_02001	hypothetical protein
Alteromonas sp. 76-1	alt76_02002	fibronectin type III domain protein
Alteromonas sp. 76-1	alt76_02003	hypothetical protein
Alteromonas sp. 76-1	alt76_02004	hypothetical protein
Alteromonas sp. 76-1	alt76_02005	carbohydrate esterase-like sialic acid-specific acetylesterase
Alteromonas sp. 76-1	alt76_02006	hypothetical protein
Alteromonas sp. 76-1	alt76_02090	hypothetical protein
Alteromonas sp. 76-1	alt76_02091	glyoxalase/bleomycin resistance protein/dioxygenase superfamily protein
Alteromonas sp. 76-1	alt76_02092	antibiotic biosynthesis monooxygenase
Alteromonas sp. 76-1	alt76_02093	hypothetical protein
Alteromonas sp. 76-1	alt76_02097	hypothetical protein	K07017	K07017; uncharacterized protein	Function unknown	Poorly characterized
Alteromonas sp. 76-1	alt76_02125	hypothetical protein
Alteromonas sp. 76-1	alt76_02178	MerR-like DNA binding protein
Alteromonas sp. 76-1	alt76_02201	hypothetical protein
Alteromonas sp. 76-1	alt76_02202	hypothetical protein
Alteromonas sp. 76-1	alt76_02233	uncharacterized damage-inducible protein DinB
Alteromonas sp. 76-1	alt76_02243	putative ATP-dependent endonuclease of OLD family	K07459	ybjD; putative ATP-dependent endonuclease of the OLD family	Replication, recombination and repair proteins	Genetic information processing
Alteromonas sp. 76-1	alt76_02244	DNA helicase-2/ATP-dependent DNA helicase PcrA	K03657	uvrD, pcrA; DNA helicase II / ATP-dependent DNA helicase PcrA	DNA repair and recombination proteins [BR:ko03400]	Replication and repair
Alteromonas sp. 76-1	alt76_02245	integrase
Alteromonas sp. 76-1	alt76_02246	hypothetical protein
Alteromonas sp. 76-1	alt76_02247	hypothetical protein
Alteromonas sp. 76-1	alt76_02248	hypothetical protein
Alteromonas sp. 76-1	alt76_02249	hypothetical protein
Alteromonas sp. 76-1	alt76_02250	hypothetical protein
Alteromonas sp. 76-1	alt76_02251	hypothetical protein
Alteromonas sp. 76-1	alt76_02252	hypothetical protein
Alteromonas sp. 76-1	alt76_02253	hypothetical protein
Alteromonas sp. 76-1	alt76_02254	hypothetical protein
Alteromonas sp. 76-1	alt76_02255	hypothetical protein
Alteromonas sp. 76-1	alt76_02256	reverse transcriptase (RNA-dependent DNA polymerase)
Alteromonas sp. 76-1	alt76_02257	predicted ATP-dependent endonuclease of OLD family
Alteromonas sp. 76-1	alt76_02261	hypothetical protein
Alteromonas sp. 76-1	alt76_02262	hypothetical protein
Alteromonas sp. 76-1	alt76_02264	hypothetical protein
Alteromonas sp. 76-1	alt76_02272	uncharacterized protein DUF3325
Alteromonas sp. 76-1	alt76_02278	hypothetical protein
Alteromonas sp. 76-1	alt76_02279	uncharacterized protein DUF4154
Alteromonas sp. 76-1	alt76_02280	diguanylate cyclase/phosphodiesterase
Alteromonas sp. 76-1	alt76_02336	hypothetical protein
Alteromonas sp. 76-1	alt76_02371	hypothetical protein
Alteromonas sp. 76-1	alt76_02374	hypothetical protein
Alteromonas sp. 76-1	alt76_02375	hypothetical protein
Alteromonas sp. 76-1	alt76_02378	hypothetical protein
Alteromonas sp. 76-1	alt76_02379	hypothetical protein
Alteromonas sp. 76-1	alt76_02380	hypothetical protein
Alteromonas sp. 76-1	alt76_02381	hypothetical protein
Alteromonas sp. 76-1	alt76_02382	hypothetical protein
Alteromonas sp. 76-1	alt76_02383	hypothetical protein
Alteromonas sp. 76-1	alt76_02385	hypothetical protein
Alteromonas sp. 76-1	alt76_02386	hypothetical protein
Alteromonas sp. 76-1	alt76_02387	uridine kinase
Alteromonas sp. 76-1	alt76_02388	hypothetical protein
Alteromonas sp. 76-1	alt76_02389	hypothetical protein
Alteromonas sp. 76-1	alt76_02390	dienelactone hydrolase
Alteromonas sp. 76-1	alt76_02391	hypothetical protein
Alteromonas sp. 76-1	alt76_02392	hypothetical protein
Alteromonas sp. 76-1	alt76_02394	hypothetical protein
Alteromonas sp. 76-1	alt76_02395	hypothetical protein
Alteromonas sp. 76-1	alt76_02397	hypothetical protein
Alteromonas sp. 76-1	alt76_02398	hypothetical protein
Alteromonas sp. 76-1	alt76_02399	proteic killer suppression protein
Alteromonas sp. 76-1	alt76_02400	Xre family transcriptional regulator	K21498	higA-1; antitoxin HigA-1	Prokaryotic Defense System [BR:ko02048]	Transport and catabolism
Alteromonas sp. 76-1	alt76_02401	hypothetical protein
Alteromonas sp. 76-1	alt76_02402	ribosomal-protein-alanine N-acetyltransferase
Alteromonas sp. 76-1	alt76_02403	hypothetical protein
Alteromonas sp. 76-1	alt76_02404	hypothetical protein
Alteromonas sp. 76-1	alt76_02405	hypothetical protein
Alteromonas sp. 76-1	alt76_02406	hypothetical protein
Alteromonas sp. 76-1	alt76_02409	hypothetical protein
Alteromonas sp. 76-1	alt76_02410	trypsin
Alteromonas sp. 76-1	alt76_02411	hypothetical protein
Alteromonas sp. 76-1	alt76_02415	hypothetical protein
Alteromonas sp. 76-1	alt76_02416	hypothetical protein
Alteromonas sp. 76-1	alt76_02418	hypothetical protein
Alteromonas sp. 76-1	alt76_02419	hypothetical protein
Alteromonas sp. 76-1	alt76_02420	hypothetical protein
Alteromonas sp. 76-1	alt76_02421	hypothetical protein
Alteromonas sp. 76-1	alt76_02422	hypothetical protein
Alteromonas sp. 76-1	alt76_02423	Zn-finger nucleic acid-binding protein
Alteromonas sp. 76-1	alt76_02424	CubicO group peptidase (beta-lactamase class C family)	K01467	ampC; beta-lactamase class C	beta-Lactam resistance [PATH:ko01501]	Drug resistance
Alteromonas sp. 76-1	alt76_02430	hypothetical protein
Alteromonas sp. 76-1	alt76_02431	hypothetical protein
Alteromonas sp. 76-1	alt76_02444	CAAX prenyl protease-like protein
Alteromonas sp. 76-1	alt76_02445	hypothetical protein
Alteromonas sp. 76-1	alt76_02557	hypothetical protein
Alteromonas sp. 76-1	alt76_02558	hypothetical protein
Alteromonas sp. 76-1	alt76_02559	hypothetical protein
Alteromonas sp. 76-1	alt76_02560	hypothetical protein
Alteromonas sp. 76-1	alt76_02561	hypothetical protein
Alteromonas sp. 76-1	alt76_02562	hypothetical protein
Alteromonas sp. 76-1	alt76_02563	type I restriction enzyme S subunit	K01154	hsdS; type I restriction enzyme, S subunit	Prokaryotic Defense System [BR:ko02048]	Transport and catabolism
Alteromonas sp. 76-1	alt76_02564	type I restriction enzyme M protein	K03427	hsdM; type I restriction enzyme M protein	Prokaryotic Defense System [BR:ko02048]	Transport and catabolism
Alteromonas sp. 76-1	alt76_02565	type I restriction enzyme R subunit	K01153	hsdR; type I restriction enzyme, R subunit	Prokaryotic Defense System [BR:ko02048]	Transport and catabolism
Alteromonas sp. 76-1	alt76_02566	hypothetical protein
Alteromonas sp. 76-1	alt76_02567	hypothetical protein
Alteromonas sp. 76-1	alt76_02568	uncharacterized protein DUF4258
Alteromonas sp. 76-1	alt76_02569	hypothetical protein
Alteromonas sp. 76-1	alt76_02570	hypothetical protein
Alteromonas sp. 76-1	alt76_02571	hypothetical protein
Alteromonas sp. 76-1	alt76_02572	hypothetical protein
Alteromonas sp. 76-1	alt76_02574	hypothetical protein
Alteromonas sp. 76-1	alt76_02575	hypothetical protein
Alteromonas sp. 76-1	alt76_02576	hypothetical protein
Alteromonas sp. 76-1	alt76_02577	uncharacterized protein DUF4760
Alteromonas sp. 76-1	alt76_02598	hypothetical protein
Alteromonas sp. 76-1	alt76_02599	hypothetical protein
Alteromonas sp. 76-1	alt76_02600	ATP-dependent Zn protease	K03798	ftsH, hflB; cell division protease FtsH	Peptidases [BR:ko01002]	Enzyme families
Alteromonas sp. 76-1	alt76_02627	hypothetical protein
Alteromonas sp. 76-1	alt76_02637	hypothetical protein
Alteromonas sp. 76-1	alt76_02638	hypothetical protein
Alteromonas sp. 76-1	alt76_02639	hypothetical protein
Alteromonas sp. 76-1	alt76_02640	hypothetical protein
Alteromonas sp. 76-1	alt76_02641	predicted DNA-binding transcriptional regulator YafY
Alteromonas sp. 76-1	alt76_02642	hypothetical protein
Alteromonas sp. 76-1	alt76_02643	hypothetical protein
Alteromonas sp. 76-1	alt76_02681	phosphinothricin acetyltransferase	K03823	pat; phosphinothricin acetyltransferase	Phosphonate and phosphinate metabolism [PATH:ko00440]	Metabolism of other amino acids
Alteromonas sp. 76-1	alt76_02682	NADPH-dependent FMN reductase
Alteromonas sp. 76-1	alt76_02695	hypothetical protein
Alteromonas sp. 76-1	alt76_02696	hypothetical protein
Alteromonas sp. 76-1	alt76_02725	hypothetical protein
Alteromonas sp. 76-1	alt76_02823	peptidoglycan/LPS O-acetylase OafA/YrhL
Alteromonas sp. 76-1	alt76_02887	trypsin-like peptidase	K08786	HTRA4; HtrA serine peptidase 4	Peptidases [BR:ko01002]	Enzyme families
Alteromonas sp. 76-1	alt76_02889	predicted secreted protein with PEP-CTERM sorting signal
Alteromonas sp. 76-1	alt76_02890	putative PEP-CTERM system TPR-repeat lipoprotein
Alteromonas sp. 76-1	alt76_02891	ThiF family protein
Alteromonas sp. 76-1	alt76_02898	hypothetical protein
Alteromonas sp. 76-1	alt76_02899	O-antigen/teichoic acid export membrane protein
Alteromonas sp. 76-1	alt76_02900	hypothetical protein
Alteromonas sp. 76-1	alt76_02901	peptidoglycan/LPS O-acetylase OafA/YrhL
Alteromonas sp. 76-1	alt76_02903	exonuclease III
Alteromonas sp. 76-1	alt76_02905	hypothetical protein
Alteromonas sp. 76-1	alt76_02906	glycosyl transferase family 2
Alteromonas sp. 76-1	alt76_02907	O-antigen ligase
Alteromonas sp. 76-1	alt76_02908	CelD/BcsL family acetyltransferase involved in cellulose biosynthesis
Alteromonas sp. 76-1	alt76_02909	exosortase A
Alteromonas sp. 76-1	alt76_02951	hypothetical protein
Alteromonas sp. 76-1	alt76_02986	D-threo-aldose 1-dehydrogenase	K00064	E1.1.1.122; D-threo-aldose 1-dehydrogenase	Fructose and mannose metabolism [PATH:ko00051]	Carbohydrate metabolism
Alteromonas sp. 76-1	alt76_03000	DeoR family transcriptional regulator
Alteromonas sp. 76-1	alt76_03001	sugar/nucleoside kinase (ribokinase family)	K21621	fk; tagatose kinase	Galactose metabolism [PATH:ko00052]	Carbohydrate metabolism
Alteromonas sp. 76-1	alt76_03002	fructokinase	K00847	E2.7.1.4, scrK; fructokinase	Starch and sucrose metabolism [PATH:ko00500]	Carbohydrate metabolism
Alteromonas sp. 76-1	alt76_03003	tagatose-bisphosphate aldolase noncatalytic subunit	K16371	gatZ-kbaZ; D-tagatose-1,6-bisphosphate aldolase subunit GatZ/KbaZ	Galactose metabolism [PATH:ko00052]	Carbohydrate metabolism
Alteromonas sp. 76-1	alt76_03004	NAD(P)-dependent dehydrogenase (short-subunit alcohol dehydrogenase family)	K00059	fabG; 3-oxoacyl-[acyl-carrier protein] reductase	Prodigiosin biosyntheses [PATH:ko00333]	Biosynthesis of other secondary metabolites
Alteromonas sp. 76-1	alt76_03024	major royal jelly protein
Alteromonas sp. 76-1	alt76_03035	quinol monooxygenase YgiN
Alteromonas sp. 76-1	alt76_03036	uncharacterized protein DUF2798
Alteromonas sp. 76-1	alt76_03037	DNA-binding transcriptional LysR family regulator
Alteromonas sp. 76-1	alt76_03048	hypothetical protein
Alteromonas sp. 76-1	alt76_03049	cbb3-type cytochrome c oxidase subunit III
Alteromonas sp. 76-1	alt76_03050	methylamine dehydrogenase light chain
Alteromonas sp. 76-1	alt76_03051	methylamine dehydrogenase accessory protein MauD
Alteromonas sp. 76-1	alt76_03052	methylamine utilization protein MauE
Alteromonas sp. 76-1	alt76_03053	methylamine dehydrogenase heavy chain
Alteromonas sp. 76-1	alt76_03054	iron complex outermembrane receptor protein	K02014	TC.FEV.OM; iron complex outermembrane recepter protein	Transporters [BR:ko02000]	Membrane transport
Alteromonas sp. 76-1	alt76_03055	TetR family transcriptional regulator
Alteromonas sp. 76-1	alt76_03065	hypothetical protein	K09974	K09974; uncharacterized protein	Function unknown	Poorly characterized
Alteromonas sp. 76-1	alt76_03066	hypothetical protein
Alteromonas sp. 76-1	alt76_03067	membrane associated rhomboid family serine protease
Alteromonas sp. 76-1	alt76_03071	PAS domain S-box-containing protein	K11527	K11527; two-component system, sensor histidine kinase and response regulator	Protein kinases [BR:ko01001]	Enzyme families
Alteromonas sp. 76-1	alt76_03075	peptidase S41-like protein
Alteromonas sp. 76-1	alt76_03076	hypothetical protein
Alteromonas sp. 76-1	alt76_03082	transporter (NhaC family)	K03315	nhaC; Na+:H+ antiporter, NhaC family	Transporters [BR:ko02000]	Membrane transport
Alteromonas sp. 76-1	alt76_03089	hypothetical protein	K09984	K09984; uncharacterized protein	Function unknown	Poorly characterized
Alteromonas sp. 76-1	alt76_03090	hypothetical protein
Alteromonas sp. 76-1	alt76_03091	hypothetical protein
Alteromonas sp. 76-1	alt76_03092	ubiquinone/menaquinone biosynthesis C-methylase UbiE
Alteromonas sp. 76-1	alt76_03093	glycosyltransferase involved in cell wall biosynthesis
Alteromonas sp. 76-1	alt76_03098	DUF2945 family protein
Alteromonas sp. 76-1	alt76_03099	DNA-3-methyladenine glycosylase	K03652	MPG; DNA-3-methyladenine glycosylase	Base excision repair [PATH:ko03410]	Replication and repair
Alteromonas sp. 76-1	alt76_03102	luciferase-type oxidoreductase
Alteromonas sp. 76-1	alt76_03104	NADPH:quinone reductase-like Zn-dependent oxidoreductase
Alteromonas sp. 76-1	alt76_03108	predicted dehydrogenase	K00010	iolG; myo-inositol 2-dehydrogenase / D-chiro-inositol 1-dehydrogenase	Streptomycin biosynthesis [PATH:ko00521]	Biosynthesis of other secondary metabolites
Alteromonas sp. 76-1	alt76_03111	hypothetical protein
Alteromonas sp. 76-1	alt76_03112	hypothetical protein
Alteromonas sp. 76-1	alt76_03113	glycerophosphoryl diester phosphodiesterase	K01126	E3.1.4.46, glpQ, ugpQ; glycerophosphoryl diester phosphodiesterase	Glycerophospholipid metabolism [PATH:ko00564]	Lipid metabolism
Alteromonas sp. 76-1	alt76_03114	TonB-dependent receptor
Alteromonas sp. 76-1	alt76_03115	MarR family transcriptional regulator
Alteromonas sp. 76-1	alt76_03116	sugar (glycoside-pentoside-hexuronide) transporter	K03292	TC.GPH; glycoside/pentoside/hexuronide:cation symporter, GPH family	Transport	Cellular processes and signaling
Alteromonas sp. 76-1	alt76_03189	hypothetical protein
Alteromonas sp. 76-1	alt76_03214	tRNA-binding protein	K06878	K06878; tRNA-binding protein	General function prediction only	Poorly characterized
Alteromonas sp. 76-1	alt76_03251	uncharacterized protein DUF3703
Alteromonas sp. 76-1	alt76_03252	Cd(II)/Pb(II)-responsive transcriptional regulator
Alteromonas sp. 76-1	alt76_03326	putative MATE family efflux protein
Alteromonas sp. 76-1	alt76_03327	siderophore synthetase component
Alteromonas sp. 76-1	alt76_03328	siderophore synthetase component
Alteromonas sp. 76-1	alt76_03329	fatty-acyl-CoA synthase
Alteromonas sp. 76-1	alt76_03330	acyl carrier protein
Alteromonas sp. 76-1	alt76_03331	3-dehydroshikimate dehydratase
Alteromonas sp. 76-1	alt76_03332	predicted acyltransferase
Alteromonas sp. 76-1	alt76_03334	hypothetical protein
Alteromonas sp. 76-1	alt76_03335	transcriptional regulator
Alteromonas sp. 76-1	alt76_03336	hypothetical protein
Alteromonas sp. 76-1	alt76_03337	hypothetical protein
Alteromonas sp. 76-1	alt76_03338	hypothetical protein
Alteromonas sp. 76-1	alt76_03339	hypothetical protein
Alteromonas sp. 76-1	alt76_03340	4'-phosphopantetheinyl transferase EntD	K02362	entD; enterobactin synthetase component D	Biosynthesis of siderophore group nonribosomal peptides [PATH:ko01053]	Metabolism of terpenoids and polyketides
Alteromonas sp. 76-1	alt76_03341	surfactin synthase thioesterase subunit
Alteromonas sp. 76-1	alt76_03342	hypothetical protein
Alteromonas sp. 76-1	alt76_03343	trypsin
Alteromonas sp. 76-1	alt76_03344	alpha-ketoglutarate-dependent taurine dioxygenase
Alteromonas sp. 76-1	alt76_03345	thioesterase domain-containing protein
Alteromonas sp. 76-1	alt76_03346	amino acid adenylation domain-containing protein	K15667	K15667, ppsD, fenA; fengycin family lipopeptide synthetase D	Polyketide biosynthesis proteins [BR:ko01008]	Metabolism of terpenoids and polyketides
Alteromonas sp. 76-1	alt76_03347	FkbM family methyltransferase/amino acid adenylation domain-containing protein	K04789	mbtE; mycobactin peptide synthetase MbtE	Polyketide biosynthesis proteins [BR:ko01008]	Metabolism of terpenoids and polyketides
Alteromonas sp. 76-1	alt76_03348	amino acid adenylation domain-containing protein
Alteromonas sp. 76-1	alt76_03350	acyl transferase domain-containing protein	K12444	ppsE; phthiocerol/phenolphthiocerol synthesis type-I polyketide synthase E	Lipid biosynthesis proteins [BR:ko01004]	Lipid metabolism
Alteromonas sp. 76-1	alt76_03351	amino acid adenylation domain-containing protein	K04788	mbtB; mycobactin phenyloxazoline synthetase	Polyketide biosynthesis proteins [BR:ko01008]	Metabolism of terpenoids and polyketides
Alteromonas sp. 76-1	alt76_03352	amino acid adenylation domain-containing protein	K01895	ACSS, acs; acetyl-CoA synthetase	Propanoate metabolism [PATH:ko00640]	Carbohydrate metabolism
Alteromonas sp. 76-1	alt76_03353	putative ATP-binding cassette transporter/putative ATP-binding cassette transporter	K06159	yojI; multidrug/microcin transport system ATP-binding/permease protein	ABC transporters [PATH:ko02010]	Membrane transport
Alteromonas sp. 76-1	alt76_03354	amino acid adenylation domain-containing protein	K01897	ACSL, fadD; long-chain acyl-CoA synthetase	Ferroptosis [PATH:ko04216]	Cell growth and death
Alteromonas sp. 76-1	alt76_03355	nicotianamine synthase-like protein
Alteromonas sp. 76-1	alt76_03356	peptidase M28-like protein
Alteromonas sp. 76-1	alt76_03357	hypothetical protein
Alteromonas sp. 76-1	alt76_03358	predicted permease
Alteromonas sp. 76-1	alt76_03360	multidrug efflux pump subunit AcrA (membrane-fusion protein)
Alteromonas sp. 76-1	alt76_03361	3-oxoacyl-[acyl-carrier-protein] synthase III
Alteromonas sp. 76-1	alt76_03362	pyrroloquinoline quinone (PQQ) biosynthesis protein C
Alteromonas sp. 76-1	alt76_03363	hypothetical protein
Alteromonas sp. 76-1	alt76_03364	hypothetical protein	K07045	K07045; uncharacterized protein	Function unknown	Poorly characterized
Alteromonas sp. 76-1	alt76_03365	acyl carrier protein
Alteromonas sp. 76-1	alt76_03366	long-subunit acyl-CoA synthetase (AMP-forming)	K01897	ACSL, fadD; long-chain acyl-CoA synthetase	Ferroptosis [PATH:ko04216]	Cell growth and death
Alteromonas sp. 76-1	alt76_03367	integrase-like protein
Alteromonas sp. 76-1	alt76_03368	hypothetical protein
Alteromonas sp. 76-1	alt76_03378	phospho-acceptor domain-containing protein	K02482	K02482; two-component system, NtrC family, sensor kinase	Protein kinases [BR:ko01001]	Enzyme families
Alteromonas sp. 76-1	alt76_03379	FAD-dependent sensor of blue light
Alteromonas sp. 76-1	alt76_03414	poly(beta-D-mannuronate) lyase
Alteromonas sp. 76-1	alt76_03415	predicted secreted protein with PEP-CTERM sorting signal
Alteromonas sp. 76-1	alt76_03416	TonB-dependent receptor
Alteromonas sp. 76-1	alt76_03417	parallel beta-helix repeat protein
Alteromonas sp. 76-1	alt76_03418	alginate lyase
Alteromonas sp. 76-1	alt76_03420	poly(beta-D-mannuronate) lyase
Alteromonas sp. 76-1	alt76_03421	3-oxoacyl-[acyl-carrier protein] reductase	K00038	E1.1.1.53; 3alpha(or 20beta)-hydroxysteroid dehydrogenase	Steroid hormone biosynthesis [PATH:ko00140]	Lipid metabolism
Alteromonas sp. 76-1	alt76_03422	3-hydroxyisobutyrate dehydrogenase	K00020	mmsB, HIBADH; 3-hydroxyisobutyrate dehydrogenase	Valine, leucine and isoleucine degradation [PATH:ko00280]	Amino acid metabolism
Alteromonas sp. 76-1	alt76_03423	cupin domain
Alteromonas sp. 76-1	alt76_03424	ACS family hexuronate transporter-like MFS transporter	K08191	exuT; MFS transporter, ACS family, hexuronate transporter	Transporters [BR:ko02000]	Membrane transport
Alteromonas sp. 76-1	alt76_03456	hypothetical protein
Alteromonas sp. 76-1	alt76_03474	outer membrane receptor for ferrienterochelin and colicins
Alteromonas sp. 76-1	alt76_03521	AsnC family transcriptional regulator	K03719	lrp; Lrp/AsnC family transcriptional regulator, leucine-responsive regulatory protein	Chromosome and associated proteins [BR:ko03036]	Replication and repair
Alteromonas sp. 76-1	alt76_03537	hypothetical protein
Alteromonas sp. 76-1	alt76_03568	serine protease AprX	K17734	aprX; serine protease AprX	Peptidases [BR:ko01002]	Enzyme families
Alteromonas sp. 76-1	alt76_03569	hypothetical protein
Alteromonas sp. 76-1	alt76_03570	GAF domain-containing protein
Alteromonas sp. 76-1	alt76_03571	serine/threonine protein kinase	K12132	prkC, stkP; eukaryotic-like serine/threonine-protein kinase	Protein kinases [BR:ko01001]	Enzyme families
Alteromonas sp. 76-1	alt76_03572	two-component system NarL family sensor kinase	K11617	liaS; two-component system, NarL family, sensor histidine kinase LiaS	Protein kinases [BR:ko01001]	Enzyme families
Alteromonas sp. 76-1	alt76_03573	DNA-binding NarL/FixJ family response regulator	K07685	narP; two-component system, NarL family, nitrate/nitrite response regulator NarP	Two-component system [BR:ko02022]	Signal transduction
Alteromonas sp. 76-1	alt76_03574	subtilisin family serine protease
Alteromonas sp. 76-1	alt76_03575	hypothetical protein
Alteromonas sp. 76-1	alt76_03607	FkbM family methyltransferase
Alteromonas sp. 76-1	alt76_03608	phosphoglycolate phosphatase-like HAD superfamily hydrolase
Alteromonas sp. 76-1	alt76_03609	4-hydroxy 2-oxovalerate aldolase	K01666	mhpE; 4-hydroxy 2-oxovalerate aldolase	Phenylalanine metabolism [PATH:ko00360]	Amino acid metabolism
Alteromonas sp. 76-1	alt76_03610	hypothetical protein
Alteromonas sp. 76-1	alt76_03611	CMP-N-acetylneuraminic acid synthetase
Alteromonas sp. 76-1	alt76_03612	capsular polysaccharide biosynthesis protein
Alteromonas sp. 76-1	alt76_03613	hypothetical protein
Alteromonas sp. 76-1	alt76_03614	alpha-1,3-rhamnosyl/mannosyltransferase	K12994	wbpY, wbdB; alpha-1,3-rhamnosyl/mannosyltransferase	Glycosyltransferases [BR:ko01003]	Glycan biosynthesis and metabolism
Alteromonas sp. 76-1	alt76_03615	hypothetical protein
Alteromonas sp. 76-1	alt76_03616	hypothetical protein
Alteromonas sp. 76-1	alt76_03617	coenzyme F420-reducing hydrogenase beta subunit
Alteromonas sp. 76-1	alt76_03618	core-2/I-Branching enzyme
Alteromonas sp. 76-1	alt76_03619	hypothetical protein
Alteromonas sp. 76-1	alt76_03620	GT2 family glycosyltransferase	K07011	K07011; uncharacterized protein	Function unknown	Poorly characterized
Alteromonas sp. 76-1	alt76_03621	hypothetical protein
Alteromonas sp. 76-1	alt76_03622	glycosyl transferase family 2
Alteromonas sp. 76-1	alt76_03623	hypothetical protein
Alteromonas sp. 76-1	alt76_03624	GT2 family glycosyltransferase	K20444	rfbC; O-antigen biosynthesis protein	Lipopolysaccharide biosynthesis proteins [BR:ko01005]	Glycan biosynthesis and metabolism
Alteromonas sp. 76-1	alt76_03630	SSU ribosomal protein S13P	K02952	RP-S13, rpsM; small subunit ribosomal protein S13	Ribosome [BR:ko03011]	Translation
Alteromonas sp. 76-1	alt76_03661	hypothetical protein
Alteromonas sp. 76-1	alt76_03692	hypothetical protein
Alteromonas sp. 76-1	alt76_03725	hypothetical protein
Alteromonas sp. 76-1	alt76_03754	Tfp pilus assembly protein PilF
Alteromonas sp. 76-1	alt76_03761	polar amino acid transport system substrate-binding protein
Alteromonas sp. 76-1	alt76_03814	L-ascorbate metabolism protein UlaG (beta-lactamase superfamily)	K13985	NAPEPLD; N-acyl-phosphatidylethanolamine-hydrolysing phospholipase D	Retrograde endocannabinoid signaling [PATH:ko04723]	Nervous system
Alteromonas sp. 76-1	alt76_03819	hypothetical protein
Alteromonas sp. 76-1	alt76_03865	hypothetical protein	K07017	K07017; uncharacterized protein	Function unknown	Poorly characterized
Alteromonas sp. 76-1	alt76_03869	hypothetical protein
Alteromonas sp. 76-1	alt76_03971	hypothetical protein
Alteromonas sp. 76-1	alt76_04034	hypothetical protein
Alteromonas sp. 76-1	alt76_04113	NCS1 family nucleobase:cation symporter-1
Alteromonas sp. 76-1	alt76_04114	arylsulfatase A-like enzyme	K14607	SULF; extracellular sulfatase Sulf	Inorganic ion transport and metabolism	Cellular processes and signaling
Alteromonas sp. 76-1	alt76_04115	2-dehydro-3-deoxygluconokinase	K00874	kdgK; 2-dehydro-3-deoxygluconokinase	Pentose phosphate pathway [PATH:ko00030]	Carbohydrate metabolism
Alteromonas sp. 76-1	alt76_04116	tripartite ATP-independent transporter DctP family solute receptor	K21395	yiaO; TRAP-type transport system periplasmic protein	Transporters [BR:ko02000]	Membrane transport
Alteromonas sp. 76-1	alt76_04117	TRAP-type C4-dicarboxylate transport system permease small subunit
Alteromonas sp. 76-1	alt76_04118	tripartite ATP-independent transporter DctM subunit
Alteromonas sp. 76-1	alt76_04119	2-deoxy-D-gluconate 3-dehydrogenase	K00065	kduD; 2-dehydro-3-deoxy-D-gluconate 5-dehydrogenase	Pentose and glucuronate interconversions [PATH:ko00040]	Carbohydrate metabolism
Alteromonas sp. 76-1	alt76_04120	4-deoxy-L-threo-5-hexosulose-uronate ketol-isomerase	K01815	kduI; 4-deoxy-L-threo-5-hexosulose-uronate ketol-isomerase	Pentose and glucuronate interconversions [PATH:ko00040]	Carbohydrate metabolism
Alteromonas sp. 76-1	alt76_04121	DeoR family transcriptional regulator	K03477	ulaR; DeoR family transcriptional regulator, ulaG and ulaABCDEF operon transcriptional repressor	Transcription factors [BR:ko03000]	Transcription
Alteromonas sp. 76-1	alt76_04122	sugar (pentulose or hexulose) kinase
Alteromonas sp. 76-1	alt76_04123	rhamnulose-1-phosphate aldolase/alcohol dehydrogenase
Alteromonas sp. 76-1	alt76_04124	L-rhamnose isomerase/sugar isomerase	K01820	rhaA; L-rhamnose isomerase / sugar isomerase	Fructose and mannose metabolism [PATH:ko00051]	Carbohydrate metabolism
Alteromonas sp. 76-1	alt76_04125	L-lactate dehydrogenase (cytochrome)	K00101	lldD; L-lactate dehydrogenase (cytochrome)	Pyruvate metabolism [PATH:ko00620]	Carbohydrate metabolism
Alteromonas sp. 76-1	alt76_04126	parallel beta helix pectate lyase-like protein
Alteromonas sp. 76-1	alt76_04127	rhamnogalacturonyl hydrolase YesR	K15532	yteR, yesR; unsaturated rhamnogalacturonyl hydrolase	Glycan biosynthesis and metabolism	Metabolism
Alteromonas sp. 76-1	alt76_04128	uncharacterized sulfatase	K01132	GALNS; N-acetylgalactosamine-6-sulfatase	Glycosaminoglycan degradation [PATH:ko00531]	Glycan biosynthesis and metabolism
Alteromonas sp. 76-1	alt76_04129	putative BNR repeat neuraminidase
Alteromonas sp. 76-1	alt76_04130	alpha-L-rhamnosidase-like protein
Alteromonas sp. 76-1	alt76_04131	choline dehydrogenase-like flavoprotein	K06151	E1.1.99.3A; gluconate 2-dehydrogenase alpha chain	Pentose phosphate pathway [PATH:ko00030]	Carbohydrate metabolism
Alteromonas sp. 76-1	alt76_04132	gluconate 2-dehydrogenase subunit 3-like protein
Alteromonas sp. 76-1	alt76_04133	concanavalin A-like lectin/glucanase superfamily protein
Alteromonas sp. 76-1	alt76_04134	RNA polymerase sigma factor (sigma-70 family)
Alteromonas sp. 76-1	alt76_04135	alpha-L-rhamnosidase
Alteromonas sp. 76-1	alt76_04136	alpha-L-rhamnosidase-like protein
Alteromonas sp. 76-1	alt76_04137	arylsulfatase A-like enzyme	K01136	IDS; iduronate 2-sulfatase	Glycosaminoglycan degradation [PATH:ko00531]	Glycan biosynthesis and metabolism
Alteromonas sp. 76-1	alt76_04138	rhamnogalacturonyl hydrolase YesR	K18581	ugl; unsaturated chondroitin disaccharide hydrolase	Glycan biosynthesis and metabolism	Metabolism
Alteromonas sp. 76-1	alt76_04139	hypothetical protein
Alteromonas sp. 76-1	alt76_04140	hypothetical protein
Alteromonas sp. 76-1	alt76_04141	hypothetical protein
Alteromonas sp. 76-1	alt76_04142	uncharacterized protein (TIGR00288 family)
Alteromonas sp. 76-1	alt76_04143	putative BNR repeat neuraminidase
Alteromonas sp. 76-1	alt76_04145	TPR repeat protein
Alteromonas sp. 76-1	alt76_04146	beta-galactosidase	K01190	lacZ; beta-galactosidase	Galactose metabolism [PATH:ko00052]	Carbohydrate metabolism
Alteromonas sp. 76-1	alt76_04147	putative BNR repeat neuraminidase
Alteromonas sp. 76-1	alt76_04148	alpha-L-rhamnosidase-like protein
Alteromonas sp. 76-1	alt76_04149	DNA replication terminus site binding protein
Alteromonas sp. 76-1	alt76_04150	hypothetical protein
Alteromonas sp. 76-1	alt76_04151	phage integrase family protein with SAM-like domain
Alteromonas sp. 76-1	alt76_04153	phosphoglycolate phosphatase	K01091	gph; phosphoglycolate phosphatase	Glyoxylate and dicarboxylate metabolism [PATH:ko00630]	Carbohydrate metabolism
Alteromonas sp. 76-1	alt76_04154	phospho-acceptor domain-containing protein	K07646	kdpD; two-component system, OmpR family, sensor histidine kinase KdpD	Protein kinases [BR:ko01001]	Enzyme families
Alteromonas sp. 76-1	alt76_04155	two-component system KDP operon response regulator KdpE	K07667	kdpE; two-component system, OmpR family, KDP operon response regulator KdpE	Quorum sensing [PATH:ko02024]	Cellular community - prokaryotes
Alteromonas sp. 76-1	alt76_04156	trk system potassium uptake protein TrkA	K03499	trkA, ktrA; trk system potassium uptake protein	Transporters [BR:ko02000]	Membrane transport
Alteromonas sp. 76-1	alt76_04157	trk system potassium uptake protein TrkH	K03498	trkH, trkG, ktrB; trk system potassium uptake protein	Transporters [BR:ko02000]	Membrane transport
Alteromonas sp. 76-1	alt76_04158	ribose 5-phosphate isomerase RpiB
Alteromonas sp. 76-1	alt76_04159	hypothetical protein
Alteromonas sp. 76-1	alt76_04160	predicted CXXCH cytochrome family protein
Alteromonas sp. 76-1	alt76_04162	alpha-L-rhamnosidase
Alteromonas sp. 76-1	alt76_04163	TonB-dependent receptor
Alteromonas sp. 76-1	alt76_04164	TonB-dependent receptor
Alteromonas sp. 76-1	alt76_04165	uncharacterized protein DUF4861
Alteromonas sp. 76-1	alt76_04166	L-rhamnose mutarotase	K03534	rhaM; L-rhamnose mutarotase	Carbohydrate metabolism	Metabolism
Alteromonas sp. 76-1	alt76_04170	inner membrane protein
Alteromonas sp. 76-1	alt76_04171	uncharacterized sulfatase	K01135	ARSB; arylsulfatase B	Glycosaminoglycan degradation [PATH:ko00531]	Glycan biosynthesis and metabolism
Alteromonas sp. 76-1	alt76_04172	rhamnogalacturonyl hydrolase YesR	K15532	yteR, yesR; unsaturated rhamnogalacturonyl hydrolase	Glycan biosynthesis and metabolism	Metabolism
Alteromonas sp. 76-1	alt76_04173	putative BNR repeat neuraminidase
Alteromonas sp. 76-1	alt76_04174	arylsulfatase A-like enzyme
Alteromonas sp. 76-1	alt76_04175	putative BNR repeat neuraminidase
Alteromonas sp. 76-1	alt76_04176	arylsulfatase A-like enzyme	K01565	SGSH; N-sulfoglucosamine sulfohydrolase	Glycosaminoglycan degradation [PATH:ko00531]	Glycan biosynthesis and metabolism
Alteromonas sp. 76-1	alt76_04177	alpha-L-rhamnosidase
Alteromonas sp. 76-1	alt76_04178	hypothetical protein
Alteromonas sp. 76-1	alt76_04179	uncharacterized protein DUF1080
Alteromonas sp. 76-1	alt76_04180	alcohol dehydrogenase
Alteromonas sp. 76-1	alt76_04181	hypothetical protein
Alteromonas sp. 76-1	alt76_04182	hypothetical protein
Alteromonas sp. 76-1	alt76_04183	serine/threonine-protein kinase HipA	K07154	hipA; serine/threonine-protein kinase HipA	Protein kinases [BR:ko01001]	Enzyme families
Alteromonas sp. 76-1	alt76_04184	hypothetical protein
Alteromonas sp. 76-1	alt76_04185	beta-xylosidase
Alteromonas sp. 76-1	alt76_04186	hypothetical protein
Alteromonas sp. 76-1	alt76_04187	arylsulfatase A-like enzyme	K01136	IDS; iduronate 2-sulfatase	Glycosaminoglycan degradation [PATH:ko00531]	Glycan biosynthesis and metabolism
Alteromonas sp. 76-1	alt76_04188	putative BNR repeat neuraminidase
Alteromonas sp. 76-1	alt76_04189	predicted secreted protein with PEP-CTERM sorting signal
Alteromonas sp. 76-1	alt76_04190	pectate lyase-like protein
Alteromonas sp. 76-1	alt76_04191	hypothetical protein
A.naphthalenivorans SN2	AMB_00000390	Sugar lactone lactonase YvrE
A.naphthalenivorans SN2	AMB_00000400	Quinol monooxygenase YgiN
A.naphthalenivorans SN2	AMB_00000530	hypothetical protein
A.naphthalenivorans SN2	AMB_00000570	Transposase
A.naphthalenivorans SN2	AMB_00000930	hypothetical protein
A.naphthalenivorans SN2	AMB_00001550	hypothetical protein
A.naphthalenivorans SN2	AMB_00002030	FHA modulated ABC efflux pump with fused ATPase and	K02021	ABC.MR; putative ABC transport system ATP-binding protein	Transporters [BR:ko02000]	Membrane transport
A.naphthalenivorans SN2	AMB_00002040	neutral peptidase B	K01400	nprE; bacillolysin	Peptidases [BR:ko01002]	Enzyme families
A.naphthalenivorans SN2	AMB_00002050	Serine/threonine protein phosphatase PrpC	K20074	prpC, phpP; PPM family protein phosphatase	Protein phosphatase and associated proteins [BR:ko01009]	Enzyme families
A.naphthalenivorans SN2	AMB_00002060	Serine/threonine protein kinase	K08884	K08884; serine/threonine protein kinase, bacterial	Protein kinases [BR:ko01001]	Enzyme families
A.naphthalenivorans SN2	AMB_00002070	hypothetical protein
A.naphthalenivorans SN2	AMB_00002080	hypothetical protein
A.naphthalenivorans SN2	AMB_00002100	MotA/TolQ/ExbB proton channel family protein
A.naphthalenivorans SN2	AMB_00002110	FHA domain-containing protein
A.naphthalenivorans SN2	AMB_00002120	Serine/threonine protein phosphatase PrpC	K20074	prpC, phpP; PPM family protein phosphatase	Protein phosphatase and associated proteins [BR:ko01009]	Enzyme families
A.naphthalenivorans SN2	AMB_00002130	FHA domain-containing protein
A.naphthalenivorans SN2	AMB_00002140	von Willebrand factor type A domain-containing protein
A.naphthalenivorans SN2	AMB_00002150	von Willebrand factor type A domain-containing protein
A.naphthalenivorans SN2	AMB_00002180	hypothetical protein
A.naphthalenivorans SN2	AMB_00002190	hypothetical protein
A.naphthalenivorans SN2	AMB_00002200	DNA-binding transcriptional regulator, LysR family
A.naphthalenivorans SN2	AMB_00002210	Sterol desaturase/sphingolipid hydroxylase, fatty acid hydroxylase superfamily
A.naphthalenivorans SN2	AMB_00002220	maltoporin
A.naphthalenivorans SN2	AMB_00002230	hypothetical protein
A.naphthalenivorans SN2	AMB_00002240	transposase	K07483	K07483; transposase	Replication, recombination and repair proteins	Genetic information processing
A.naphthalenivorans SN2	AMB_00002250	putative transposase
A.naphthalenivorans SN2	AMB_00002260	putative transposase
A.naphthalenivorans SN2	AMB_00002650	CHAT domain-containing protein
A.naphthalenivorans SN2	AMB_00002660	RNA polymerase sigma-70 factor, ECF subfamily
A.naphthalenivorans SN2	AMB_00002670	hypothetical protein
A.naphthalenivorans SN2	AMB_00002680	hypothetical protein
A.naphthalenivorans SN2	AMB_00002690	hypothetical protein
A.naphthalenivorans SN2	AMB_00002700	hypothetical protein
A.naphthalenivorans SN2	AMB_00002710	hypothetical protein
A.naphthalenivorans SN2	AMB_00002800	glucose-fructose oxidoreductase
A.naphthalenivorans SN2	AMB_00002810	TPR repeat-containing protein
A.naphthalenivorans SN2	AMB_00002820	prevent-host-death family protein
A.naphthalenivorans SN2	AMB_00002830	ParE toxin of type II toxin-antitoxin system, parDE
A.naphthalenivorans SN2	AMB_00003290	porin, OprB family	K07267	oprB; porin	Transporters [BR:ko02000]	Membrane transport
A.naphthalenivorans SN2	AMB_00003300	MFS transporter, FHS family, L-fucose permease	K02429	fucP; MFS transporter, FHS family, L-fucose permease	Transporters [BR:ko02000]	Membrane transport
A.naphthalenivorans SN2	AMB_00003610	hypothetical protein
A.naphthalenivorans SN2	AMB_00003620	hypothetical protein
A.naphthalenivorans SN2	AMB_00003630	hypothetical protein
A.naphthalenivorans SN2	AMB_00003640	hypothetical protein
A.naphthalenivorans SN2	AMB_00003650	hypothetical protein
A.naphthalenivorans SN2	AMB_00003660	hypothetical protein
A.naphthalenivorans SN2	AMB_00003670	hypothetical protein
A.naphthalenivorans SN2	AMB_00003680	hypothetical protein
A.naphthalenivorans SN2	AMB_00003690	hypothetical protein
A.naphthalenivorans SN2	AMB_00004810	hypothetical protein
A.naphthalenivorans SN2	AMB_00004980	hypothetical protein
A.naphthalenivorans SN2	AMB_00005030	hypothetical protein
A.naphthalenivorans SN2	AMB_00005040	hypothetical protein
A.naphthalenivorans SN2	AMB_00005060	hypothetical protein
A.naphthalenivorans SN2	AMB_00005070	hypothetical protein
A.naphthalenivorans SN2	AMB_00005080	hypothetical protein
A.naphthalenivorans SN2	AMB_00005090	hypothetical protein
A.naphthalenivorans SN2	AMB_00005110	hypothetical protein
A.naphthalenivorans SN2	AMB_00005120	hypothetical protein
A.naphthalenivorans SN2	AMB_00005160	Dipeptidyl aminopeptidase/acylaminoacyl peptidase
A.naphthalenivorans SN2	AMB_00005200	PEP-CTERM protein-sorting domain-containing protein
A.naphthalenivorans SN2	AMB_00005210	hypothetical protein
A.naphthalenivorans SN2	AMB_00005220	Protein of unknown function (DUF1194)
A.naphthalenivorans SN2	AMB_00005230	hypothetical protein
A.naphthalenivorans SN2	AMB_00005340	RND family efflux transporter, MFP subunit
A.naphthalenivorans SN2	AMB_00005360	ABC-type antimicrobial peptide transport system, permease component
A.naphthalenivorans SN2	AMB_00005370	DNA-binding transcriptional response regulator, NtrC family, contains REC, AAA-type	K07714	atoC; two-component system, NtrC family, response regulator AtoC	Two-component system [PATH:ko02020]	Signal transduction
A.naphthalenivorans SN2	AMB_00005380	Histidine kinase-, DNA gyrase B-, and HSP90-like ATPase	K13598	ntrY; two-component system, NtrC family, nitrogen regulation sensor histidine kinase NtrY	Protein kinases [BR:ko01001]	Enzyme families
A.naphthalenivorans SN2	AMB_00005440	protein of unknown function (DUF326)
A.naphthalenivorans SN2	AMB_00005450	Predicted signal-transduction protein containing cAMP-binding and CBS domains
A.naphthalenivorans SN2	AMB_00005460	sodium/proton antiporter, CPA1 family	K03316	TC.CPA1; monovalent cation:H+ antiporter, CPA1 family	Transport	Cellular processes and signaling
A.naphthalenivorans SN2	AMB_00005470	Predicted glycosyltransferases
A.naphthalenivorans SN2	AMB_00005540	hypothetical protein
A.naphthalenivorans SN2	AMB_00005550	transcriptional regulator
A.naphthalenivorans SN2	AMB_00005560	Ricin-type beta-trefoil lectin domain-containing protein
A.naphthalenivorans SN2	AMB_00005570	hypothetical protein
A.naphthalenivorans SN2	AMB_00005710	hypothetical protein
A.naphthalenivorans SN2	AMB_00005720	hypothetical protein
A.naphthalenivorans SN2	AMB_00005740	Uncharacterized conserved protein, DUF885 familyt
A.naphthalenivorans SN2	AMB_00005760	hypothetical protein
A.naphthalenivorans SN2	AMB_00005810	Putative Mn2+ efflux pump MntP
A.naphthalenivorans SN2	AMB_00005940	Calcineurin-like phosphoesterase
A.naphthalenivorans SN2	AMB_00005970	hypothetical protein
A.naphthalenivorans SN2	AMB_00005980	hypothetical protein
A.naphthalenivorans SN2	AMB_00005990	hypothetical protein
A.naphthalenivorans SN2	AMB_00006030	transcriptional regulator, HxlR family
A.naphthalenivorans SN2	AMB_00006040	hypothetical protein
A.naphthalenivorans SN2	AMB_00006490	two component transcriptional regulator, LytTR family	K07705	lytT, lytR; two-component system, LytTR family, response regulator LytT	Two-component system [BR:ko02022]	Signal transduction
A.naphthalenivorans SN2	AMB_00006500	Putative regulator of cell autolysis	K02478	K02478; two-component system, LytTR family, sensor kinase	Protein kinases [BR:ko01001]	Enzyme families
A.naphthalenivorans SN2	AMB_00006510	hypothetical protein
A.naphthalenivorans SN2	AMB_00006800	hypothetical protein
A.naphthalenivorans SN2	AMB_00006810	hypothetical protein
A.naphthalenivorans SN2	AMB_00007160	exosortase A
A.naphthalenivorans SN2	AMB_00007170	Acetyltransferase (GNAT) domain-containing protein
A.naphthalenivorans SN2	AMB_00007180	O-antigen ligase
A.naphthalenivorans SN2	AMB_00007190	LPS sulfotransferase NodH
A.naphthalenivorans SN2	AMB_00007200	Glycosyltransferase
A.naphthalenivorans SN2	AMB_00007210	Glycosyltransferases, probably involved in cell wall biogenesis
A.naphthalenivorans SN2	AMB_00007220	Glycosyltransferase involved in cell wall bisynthesis	K16150	K16150; glycogen synthase	Starch and sucrose metabolism [PATH:ko00500]	Carbohydrate metabolism
A.naphthalenivorans SN2	AMB_00007240	Peptidoglycan/LPS O-acetylase OafA/YrhL, contains acyltransferase and SGNH-hydrolase domains
A.naphthalenivorans SN2	AMB_00007250	Metal-dependent hydrolase
A.naphthalenivorans SN2	AMB_00007270	Membrane protein involved in the export of O-antigen and	K16695	wzxC; lipopolysaccharide exporter	Transporters [BR:ko02000]	Membrane transport
A.naphthalenivorans SN2	AMB_00007280	hypothetical protein
A.naphthalenivorans SN2	AMB_00007350	putative PEP-CTERM system TPR-repeat lipoprotein
A.naphthalenivorans SN2	AMB_00007360	VPLPA-CTERM protein sorting domain-containing protein
A.naphthalenivorans SN2	AMB_00007370	Dinucleotide-utilizing enzymes involved in molybdopterin and thiamine biosynthesis family	K22132	tcdA; tRNA threonylcarbamoyladenosine dehydratase	Transfer RNA biogenesis [BR:ko03016]	Translation
A.naphthalenivorans SN2	AMB_00007390	Uncharacterized SAM-binding protein YcdF, DUF218 family
A.naphthalenivorans SN2	AMB_00007400	Trypsin-like serine proteases, typically periplasmic, contain C-terminal PDZ domain
A.naphthalenivorans SN2	AMB_00007410	hypothetical protein
A.naphthalenivorans SN2	AMB_00009010	PEP-CTERM protein-sorting domain-containing protein
A.naphthalenivorans SN2	AMB_00009200	hypothetical protein
A.naphthalenivorans SN2	AMB_00009320	putative transcriptional regulator
A.naphthalenivorans SN2	AMB_00009330	RelE toxin of RelE / RelB toxin-antitoxin system
A.naphthalenivorans SN2	AMB_00009840	transposase, IS4 family	K07487	K07487; transposase	Replication, recombination and repair proteins	Genetic information processing
A.naphthalenivorans SN2	AMB_00009850	Tetratricopeptide repeat-containing protein
A.naphthalenivorans SN2	AMB_00009860	Short-chain dehydrogenase	K16066	ydfG; 3-hydroxy acid dehydrogenase / malonic semialdehyde reductase	Glycine, serine and threonine metabolism [PATH:ko00260]	Amino acid metabolism
A.naphthalenivorans SN2	AMB_00009870	Iron-containing redox enzyme
A.naphthalenivorans SN2	AMB_00009880	Long-chain acyl-CoA synthetase (AMP-forming)	K01897	ACSL, fadD; long-chain acyl-CoA synthetase	Ferroptosis [PATH:ko04216]	Cell growth and death
A.naphthalenivorans SN2	AMB_00009890	Thermostable hemolysin
A.naphthalenivorans SN2	AMB_00009900	4-amino-4-deoxy-L-arabinose transferase and related glycosyltransferases of PMT family
A.naphthalenivorans SN2	AMB_00009910	Uncharacterized membrane protein YdjX, TVP38/TMEM64 family, SNARE-associated domain
A.naphthalenivorans SN2	AMB_00009920	Glycosyltransferase involved in cell wall bisynthesis
A.naphthalenivorans SN2	AMB_00009930	hypothetical protein
A.naphthalenivorans SN2	AMB_00009940	high-affinity iron transporter
A.naphthalenivorans SN2	AMB_00009950	Cupredoxin-like domain-containing protein
A.naphthalenivorans SN2	AMB_00009960	two-component system, OmpR family, sensor histidine kinase QseC	K07645	qseC; two-component system, OmpR family, sensor histidine kinase QseC	Quorum sensing [PATH:ko02024]	Cellular community - prokaryotes
A.naphthalenivorans SN2	AMB_00009970	two-component system, OmpR family, response regulator	K02483	K02483; two-component system, OmpR family, response regulator	Two-component system [BR:ko02022]	Signal transduction
A.naphthalenivorans SN2	AMB_00010260	Sterol desaturase/sphingolipid hydroxylase, fatty acid hydroxylase superfamily
A.naphthalenivorans SN2	AMB_00010270	DNA-binding winged helix-turn-helix (wHTH) domain-containing protein
A.naphthalenivorans SN2	AMB_00010560	Primase C terminal 1 (PriCT-1)
A.naphthalenivorans SN2	AMB_00010570	Helix-turn-helix domain-containing protein
A.naphthalenivorans SN2	AMB_00010580	hypothetical protein
A.naphthalenivorans SN2	AMB_00010590	hypothetical protein
A.naphthalenivorans SN2	AMB_00010600	hypothetical protein
A.naphthalenivorans SN2	AMB_00010610	Helix-turn-helix domain-containing protein
A.naphthalenivorans SN2	AMB_00010620	hypothetical protein
A.naphthalenivorans SN2	AMB_00010630	hypothetical protein
A.naphthalenivorans SN2	AMB_00010640	Phage integrase family protein
A.naphthalenivorans SN2	AMB_00010650	hypothetical protein
A.naphthalenivorans SN2	AMB_00010660	hypothetical protein
A.naphthalenivorans SN2	AMB_00010670	Serine/threonine protein phosphatase PrpC
A.naphthalenivorans SN2	AMB_00010680	DNA helicase-2 / ATP-dependent DNA helicase PcrA
A.naphthalenivorans SN2	AMB_00010690	Predicted ATP-dependent endonuclease of the OLD family, contains P-loop
A.naphthalenivorans SN2	AMB_00010700	hypothetical protein
A.naphthalenivorans SN2	AMB_00010710	Integrase
A.naphthalenivorans SN2	AMB_00010720	integrase
A.naphthalenivorans SN2	AMB_00010730	hypothetical protein
A.naphthalenivorans SN2	AMB_00010740	hypothetical protein
A.naphthalenivorans SN2	AMB_00010750	hypothetical protein
A.naphthalenivorans SN2	AMB_00010760	Type IV secretory pathway, VirD4 components
A.naphthalenivorans SN2	AMB_00010770	type I restriction enzyme, R subunit	K01153	hsdR; type I restriction enzyme, R subunit	Prokaryotic Defense System [BR:ko02048]	Transport and catabolism
A.naphthalenivorans SN2	AMB_00010780	Type I site-specific restriction-modification system, R (restriction) subunit and
A.naphthalenivorans SN2	AMB_00010790	Fic family protein
A.naphthalenivorans SN2	AMB_00010800	Type I restriction-modification system methyltransferase subunit
A.naphthalenivorans SN2	AMB_00010810	type I restriction enzyme M protein	K03427	hsdM; type I restriction enzyme M protein	Prokaryotic Defense System [BR:ko02048]	Transport and catabolism
A.naphthalenivorans SN2	AMB_00010820	type I restriction enzyme, S subunit	K01154	hsdS; type I restriction enzyme, S subunit	Prokaryotic Defense System [BR:ko02048]	Transport and catabolism
A.naphthalenivorans SN2	AMB_00010830	hypothetical protein
A.naphthalenivorans SN2	AMB_00010870	hypothetical protein
A.naphthalenivorans SN2	AMB_00010880	hypothetical protein
A.naphthalenivorans SN2	AMB_00010890	hypothetical protein
A.naphthalenivorans SN2	AMB_00010900	hypothetical protein
A.naphthalenivorans SN2	AMB_00010910	hypothetical protein
A.naphthalenivorans SN2	AMB_00010920	Pentapeptide repeat-containing protein
A.naphthalenivorans SN2	AMB_00010930	Transposase
A.naphthalenivorans SN2	AMB_00010940	DNA replication protein DnaC
A.naphthalenivorans SN2	AMB_00010950	hypothetical protein
A.naphthalenivorans SN2	AMB_00011000	Predicted dienelactone hydrolase
A.naphthalenivorans SN2	AMB_00011060	hypothetical protein
A.naphthalenivorans SN2	AMB_00011070	Dipeptidyl aminopeptidase/acylaminoacyl peptidase
A.naphthalenivorans SN2	AMB_00011160	Zinc carboxypeptidase
A.naphthalenivorans SN2	AMB_00011380	membrane fusion protein, multidrug efflux system	K03543	emrA; membrane fusion protein, multidrug efflux system	Transporters [BR:ko02000]	Membrane transport
A.naphthalenivorans SN2	AMB_00011390	Major Facilitator Superfamily protein	K03446	emrB; MFS transporter, DHA2 family, multidrug resistance protein	Transporters [BR:ko02000]	Membrane transport
A.naphthalenivorans SN2	AMB_00011400	Outer membrane protein
A.naphthalenivorans SN2	AMB_00011410	hypothetical protein
A.naphthalenivorans SN2	AMB_00011420	Outer membrane protein
A.naphthalenivorans SN2	AMB_00011430	transcriptional regulator, TetR family	K18301	mexL; TetR/AcrR family transcriptional regulator, mexJK operon transcriptional repressor	Antimicrobial resistance genes [BR:ko01504]	Drug resistance
A.naphthalenivorans SN2	AMB_00011450	Enoyl-CoA hydratase/carnithine racemase	K15016	K15016; enoyl-CoA hydratase / 3-hydroxyacyl-CoA dehydrogenase	Carbon fixation pathways in prokaryotes [PATH:ko00720]	Energy metabolism
A.naphthalenivorans SN2	AMB_00012190	hypothetical protein
A.naphthalenivorans SN2	AMB_00012210	hypothetical protein
A.naphthalenivorans SN2	AMB_00012440	hypothetical protein
A.naphthalenivorans SN2	AMB_00012450	hypothetical protein
A.naphthalenivorans SN2	AMB_00012470	hypothetical protein
A.naphthalenivorans SN2	AMB_00012480	Plasmid stabilization system protein ParE
A.naphthalenivorans SN2	AMB_00012490	Putative addiction module component
A.naphthalenivorans SN2	AMB_00012500	hypothetical protein
A.naphthalenivorans SN2	AMB_00012510	hypothetical protein
A.naphthalenivorans SN2	AMB_00012530	hypothetical protein
A.naphthalenivorans SN2	AMB_00012540	hypothetical protein
A.naphthalenivorans SN2	AMB_00012550	hypothetical protein
A.naphthalenivorans SN2	AMB_00012560	hypothetical protein
A.naphthalenivorans SN2	AMB_00012570	hypothetical protein
A.naphthalenivorans SN2	AMB_00012580	hypothetical protein
A.naphthalenivorans SN2	AMB_00012600	RelB antitoxin
A.naphthalenivorans SN2	AMB_00012610	addiction module toxin, RelE/StbE family
A.naphthalenivorans SN2	AMB_00012620	protein of unknown function (DUF4375)
A.naphthalenivorans SN2	AMB_00012640	hypothetical protein
A.naphthalenivorans SN2	AMB_00012650	hypothetical protein
A.naphthalenivorans SN2	AMB_00012670	hypothetical protein
A.naphthalenivorans SN2	AMB_00012680	Excalibur calcium-binding domain-containing protein
A.naphthalenivorans SN2	AMB_00012690	protein of unknown function (DUF4262)
A.naphthalenivorans SN2	AMB_00012700	hypothetical protein
A.naphthalenivorans SN2	AMB_00012720	hypothetical protein
A.naphthalenivorans SN2	AMB_00012730	Pimeloyl-ACP methyl ester carboxylesterase
A.naphthalenivorans SN2	AMB_00012740	Transposase (or an inactivated derivative)
A.naphthalenivorans SN2	AMB_00012750	hypothetical protein
A.naphthalenivorans SN2	AMB_00012770	hypothetical protein
A.naphthalenivorans SN2	AMB_00012780	hypothetical protein
A.naphthalenivorans SN2	AMB_00012800	hypothetical protein
A.naphthalenivorans SN2	AMB_00012810	hypothetical protein
A.naphthalenivorans SN2	AMB_00013770	Protein of unknown function (DUF3325)
A.naphthalenivorans SN2	AMB_00013780	Pimeloyl-ACP methyl ester carboxylesterase
A.naphthalenivorans SN2	AMB_00013790	RNA polymerase sigma factor, sigma-70 family	K03088	SIG3.2, rpoE; RNA polymerase sigma-70 factor, ECF subfamily	Transcription machinery [BR:ko03021]	Transcription
A.naphthalenivorans SN2	AMB_00013860	toxin ParE1/3/4
A.naphthalenivorans SN2	AMB_00013870	antitoxin ParD1/3/4
A.naphthalenivorans SN2	AMB_00013900	Outer membrane receptor for ferrienterochelin and colicins	K16089	TC.FEV.OM2, cirA, cfrA, hmuR; outer membrane receptor for ferrienterochelin and colicins	Transporters [BR:ko02000]	Membrane transport
A.naphthalenivorans SN2	AMB_00013910	hypothetical protein
A.naphthalenivorans SN2	AMB_00013920	Predicted nuclease of the RNAse H fold, HicB family
A.naphthalenivorans SN2	AMB_00013930	integrase	K14059	int; integrase	Replication, recombination and repair proteins	Genetic information processing
A.naphthalenivorans SN2	AMB_00013940	hypothetical protein
A.naphthalenivorans SN2	AMB_00013950	hypothetical protein
A.naphthalenivorans SN2	AMB_00013970	Bacteriophage replication gene A protein (GPA)
A.naphthalenivorans SN2	AMB_00014070	F-type H+-transporting ATPase subunit gamma	K02115	ATPF1G, atpG; F-type H+-transporting ATPase subunit gamma	Photosynthesis proteins [BR:ko00194]	Energy metabolism
A.naphthalenivorans SN2	AMB_00014080	F-type H+-transporting ATPase subunit alpha	K02111	ATPF1A, atpA; F-type H+-transporting ATPase subunit alpha	Photosynthesis [PATH:ko00195]	Energy metabolism
A.naphthalenivorans SN2	AMB_00014090	ATP synthase F0 subcomplex B subunit
A.naphthalenivorans SN2	AMB_00014100	ATP synthase F0 subcomplex C subunit
A.naphthalenivorans SN2	AMB_00014110	ATP synthase F0 subcomplex A subunit	K02108	ATPF0A, atpB; F-type H+-transporting ATPase subunit a	Oxidative phosphorylation [PATH:ko00190]	Energy metabolism
A.naphthalenivorans SN2	AMB_00014120	F1/F0 ATPase, subunit 2
A.naphthalenivorans SN2	AMB_00014130	ATP synthase protein I
A.naphthalenivorans SN2	AMB_00014140	F-type H+-transporting ATPase subunit epsilon
A.naphthalenivorans SN2	AMB_00014150	F-type H+-transporting ATPase subunit beta	K02112	ATPF1B, atpD; F-type H+-transporting ATPase subunit beta	Photosynthesis [PATH:ko00195]	Energy metabolism
A.naphthalenivorans SN2	AMB_00014450	hypothetical protein
A.naphthalenivorans SN2	AMB_00014470	KAP family P-loop domain-containing protein
A.naphthalenivorans SN2	AMB_00014700	Protein-S-isoprenylcysteine O-methyltransferase Ste14
A.naphthalenivorans SN2	AMB_00014710	hypothetical protein
A.naphthalenivorans SN2	AMB_00014740	hypothetical protein
A.naphthalenivorans SN2	AMB_00014750	replication region DNA-binding N-term
A.naphthalenivorans SN2	AMB_00015640	hypothetical protein
A.naphthalenivorans SN2	AMB_00015660	transposase, IS4 family
A.naphthalenivorans SN2	AMB_00016190	hypothetical protein
A.naphthalenivorans SN2	AMB_00016200	Helix-turn-helix domain-containing protein
A.naphthalenivorans SN2	AMB_00016210	hypothetical protein
A.naphthalenivorans SN2	AMB_00016220	phage/plasmid replication protein, gene II/X family
A.naphthalenivorans SN2	AMB_00016230	hypothetical protein
A.naphthalenivorans SN2	AMB_00016650	hypothetical protein
A.naphthalenivorans SN2	AMB_00016660	DNA-binding transcriptional regulator, MarR family
A.naphthalenivorans SN2	AMB_00016670	hypothetical protein
A.naphthalenivorans SN2	AMB_00016680	Signal transduction histidine kinase
A.naphthalenivorans SN2	AMB_00016690	DNA-binding response regulator, OmpR family, contains REC and winged-helix	K10697	rpaA; two-component system, OmpR family, response regulator RpaA	Two-component system [PATH:ko02020]	Signal transduction
A.naphthalenivorans SN2	AMB_00016700	Periplasmic protease
A.naphthalenivorans SN2	AMB_00016710	Putative intracellular protease/amidase
A.naphthalenivorans SN2	AMB_00016720	Aspartyl protease
A.naphthalenivorans SN2	AMB_00016730	hypothetical protein
A.naphthalenivorans SN2	AMB_00016740	D-alanyl-D-alanine carboxypeptidase
A.naphthalenivorans SN2	AMB_00017120	hypothetical protein
A.naphthalenivorans SN2	AMB_00017130	protein of unknown function (DUF4386)
A.naphthalenivorans SN2	AMB_00017140	hypothetical protein
A.naphthalenivorans SN2	AMB_00017150	hypothetical protein
A.naphthalenivorans SN2	AMB_00017160	CubicO group peptidase, beta-lactamase class C family	K21469	pbp4b; serine-type D-Ala-D-Ala carboxypeptidase	Peptidases [BR:ko01002]	Enzyme families
A.naphthalenivorans SN2	AMB_00017170	hypothetical protein
A.naphthalenivorans SN2	AMB_00017190	hypothetical protein
A.naphthalenivorans SN2	AMB_00017200	hypothetical protein
A.naphthalenivorans SN2	AMB_00017210	hypothetical protein
A.naphthalenivorans SN2	AMB_00017240	Maltose operon substrate-binding protein precursor (MalM)
A.naphthalenivorans SN2	AMB_00017250	hypothetical protein
A.naphthalenivorans SN2	AMB_00017260	hypothetical protein
A.naphthalenivorans SN2	AMB_00017270	hypothetical protein
A.naphthalenivorans SN2	AMB_00017280	hypothetical protein
A.naphthalenivorans SN2	AMB_00017290	hypothetical protein
A.naphthalenivorans SN2	AMB_00017300	hypothetical protein
A.naphthalenivorans SN2	AMB_00017310	Retron-type transcriptase
A.naphthalenivorans SN2	AMB_00017320	hypothetical protein
A.naphthalenivorans SN2	AMB_00017330	hypothetical protein
A.naphthalenivorans SN2	AMB_00017340	DNA-binding transcriptional regulator, LysR family
A.naphthalenivorans SN2	AMB_00017350	hypothetical protein
A.naphthalenivorans SN2	AMB_00017360	hypothetical protein
A.naphthalenivorans SN2	AMB_00017400	hypothetical protein
A.naphthalenivorans SN2	AMB_00017410	Protein of unknown function (DUF2806)
A.naphthalenivorans SN2	AMB_00017420	hypothetical protein
A.naphthalenivorans SN2	AMB_00017430	protein of unknown function (DUF4145)
A.naphthalenivorans SN2	AMB_00017440	TatD DNase family protein	K03424	tatD; TatD DNase family protein	Replication, recombination and repair proteins	Genetic information processing
A.naphthalenivorans SN2	AMB_00017450	hypothetical protein
A.naphthalenivorans SN2	AMB_00017460	chorismate synthase
A.naphthalenivorans SN2	AMB_00017470	Predicted P-loop ATPase, KAP-like
A.naphthalenivorans SN2	AMB_00017480	hypothetical protein
A.naphthalenivorans SN2	AMB_00017500	hypothetical protein
A.naphthalenivorans SN2	AMB_00017510	Uncharacterized conserved protein
A.naphthalenivorans SN2	AMB_00017520	cytochrome c oxidase cbb3-type subunit 3	K00406	ccoP; cytochrome c oxidase cbb3-type subunit III	Oxidative phosphorylation [PATH:ko00190]	Energy metabolism
A.naphthalenivorans SN2	AMB_00017790	hypothetical protein
A.naphthalenivorans SN2	AMB_00017940	hypothetical protein
A.naphthalenivorans SN2	AMB_00017950	hypothetical protein
A.naphthalenivorans SN2	AMB_00017960	Bacteriophage abortive infection AbiH
A.naphthalenivorans SN2	AMB_00017970	Transposase
A.naphthalenivorans SN2	AMB_00017980	hypothetical protein
A.naphthalenivorans SN2	AMB_00017990	hypothetical protein
A.naphthalenivorans SN2	AMB_00018000	hypothetical protein
A.naphthalenivorans SN2	AMB_00018290	iron complex outermembrane recepter protein
A.naphthalenivorans SN2	AMB_00018300	alpha,alpha-trehalase	K01194	TREH, treA, treF; alpha,alpha-trehalase	Starch and sucrose metabolism [PATH:ko00500]	Carbohydrate metabolism
A.naphthalenivorans SN2	AMB_00018460	5'-deoxynucleotidase
A.naphthalenivorans SN2	AMB_00018470	Nucleoside-diphosphate-sugar epimerase
A.naphthalenivorans SN2	AMB_00018480	cytochrome c oxidase subunit 2	K02275	coxB; cytochrome c oxidase subunit II	Oxidative phosphorylation [PATH:ko00190]	Energy metabolism
A.naphthalenivorans SN2	AMB_00018490	cytochrome c oxidase subunit 1	K02274	coxA; cytochrome c oxidase subunit I	Oxidative phosphorylation [PATH:ko00190]	Energy metabolism
A.naphthalenivorans SN2	AMB_00018500	Heme/copper-type cytochrome/quinol oxidase, subunit 3
A.naphthalenivorans SN2	AMB_00018510	hypothetical protein
A.naphthalenivorans SN2	AMB_00018520	Cytochrome c oxidase assembly factor CtaG
A.naphthalenivorans SN2	AMB_00018530	Cytochrome c2
A.naphthalenivorans SN2	AMB_00018540	Cytochrome C oxidase, cbb3-type, subunit III
A.naphthalenivorans SN2	AMB_00019260	hypothetical protein
A.naphthalenivorans SN2	AMB_00019400	hypothetical protein
A.naphthalenivorans SN2	AMB_00019470	rod shape-determining protein MreB	K03569	mreB; rod shape-determining protein MreB and related proteins	Cytoskeleton proteins [BR:ko04812]	Cell motility
A.naphthalenivorans SN2	AMB_00019480	glutathione S-transferase	K00799	GST, gst; glutathione S-transferase	Chemical carcinogenesis [PATH:ko05204]	Cancers
A.naphthalenivorans SN2	AMB_00019510	hypothetical protein
A.naphthalenivorans SN2	AMB_00019520	hypothetical protein
A.naphthalenivorans SN2	AMB_00019750	hypothetical protein
A.naphthalenivorans SN2	AMB_00020060	hypothetical protein
A.naphthalenivorans SN2	AMB_00020110	hypothetical protein
A.naphthalenivorans SN2	AMB_00020550	hypothetical protein
A.naphthalenivorans SN2	AMB_00020880	hypothetical protein
A.naphthalenivorans SN2	AMB_00020890	hypothetical protein
A.naphthalenivorans SN2	AMB_00020900	Metallo-peptidase family M12B Reprolysin-like
A.naphthalenivorans SN2	AMB_00020920	hypothetical protein
A.naphthalenivorans SN2	AMB_00020930	Glycosyltransferase involved in cell wall bisynthesis	K20534	gtrB, csbB; polyisoprenyl-phosphate glycosyltransferase	Lipopolysaccharide biosynthesis proteins [BR:ko01005]	Glycan biosynthesis and metabolism
A.naphthalenivorans SN2	AMB_00020940	Putative flippase GtrA (transmembrane translocase of bactoprenol-linked glucose)
A.naphthalenivorans SN2	AMB_00020950	Peptidoglycan/LPS O-acetylase OafA/YrhL, contains acyltransferase and SGNH-hydrolase domains
A.naphthalenivorans SN2	AMB_00020960	Glycosyltransferase involved in cell wall bisynthesis
A.naphthalenivorans SN2	AMB_00020970	Glycosyltransferase involved in cell wall bisynthesis
A.naphthalenivorans SN2	AMB_00020980	hypothetical protein
A.naphthalenivorans SN2	AMB_00020990	OpgC protein
A.naphthalenivorans SN2	AMB_00021000	OpgC protein
A.naphthalenivorans SN2	AMB_00021020	hypothetical protein
A.naphthalenivorans SN2	AMB_00021030	Glycosyltransferases involved in cell wall biogenesis
A.naphthalenivorans SN2	AMB_00021040	Sulfotransferase family protein
A.naphthalenivorans SN2	AMB_00021070	Transposase and inactivated derivatives
A.naphthalenivorans SN2	AMB_00021080	hypothetical protein
A.naphthalenivorans SN2	AMB_00021090	hypothetical protein
A.naphthalenivorans SN2	AMB_00021100	hypothetical protein
A.naphthalenivorans SN2	AMB_00021120	hypothetical protein
A.naphthalenivorans SN2	AMB_00021130	Glycosyltransferases, probably involved in cell wall biogenesis
A.naphthalenivorans SN2	AMB_00021140	Glycosyltransferase involved in cell wall bisynthesis
A.naphthalenivorans SN2	AMB_00021150	Sulfotransferase family protein
A.naphthalenivorans SN2	AMB_00021170	serine O-acetyltransferase
A.naphthalenivorans SN2	AMB_00021310	hypothetical protein
A.naphthalenivorans SN2	AMB_00021470	hypothetical protein
A.naphthalenivorans SN2	AMB_00021700	hypothetical protein
A.naphthalenivorans SN2	AMB_00021710	hypothetical protein
A.naphthalenivorans SN2	AMB_00021720	hypothetical protein
A.naphthalenivorans SN2	AMB_00021730	hypothetical protein
A.naphthalenivorans SN2	AMB_00021740	hypothetical protein
A.naphthalenivorans SN2	AMB_00021750	hypothetical protein
A.naphthalenivorans SN2	AMB_00021780	hypothetical protein
A.naphthalenivorans SN2	AMB_00021790	Phage integrase family protein
A.naphthalenivorans SN2	AMB_00021800	hypothetical protein
A.naphthalenivorans SN2	AMB_00021810	hypothetical protein
A.naphthalenivorans SN2	AMB_00021820	hypothetical protein
A.naphthalenivorans SN2	AMB_00021830	hypothetical protein
A.naphthalenivorans SN2	AMB_00021840	hypothetical protein
A.naphthalenivorans SN2	AMB_00021850	hypothetical protein
A.naphthalenivorans SN2	AMB_00021860	hypothetical protein
A.naphthalenivorans SN2	AMB_00021870	hypothetical protein
A.naphthalenivorans SN2	AMB_00021880	hypothetical protein
A.naphthalenivorans SN2	AMB_00021890	hypothetical protein
A.naphthalenivorans SN2	AMB_00021900	ATP-dependent Clp endopeptidase, proteolytic subunit ClpP
A.naphthalenivorans SN2	AMB_00021910	hypothetical protein
A.naphthalenivorans SN2	AMB_00021920	hypothetical protein
A.naphthalenivorans SN2	AMB_00021930	hypothetical protein
A.naphthalenivorans SN2	AMB_00021940	hypothetical protein
A.naphthalenivorans SN2	AMB_00022490	Peptidoglycan/LPS O-acetylase OafA/YrhL, contains acyltransferase and SGNH-hydrolase domains
A.naphthalenivorans SN2	AMB_00022500	serine O-acetyltransferase
A.naphthalenivorans SN2	AMB_00022510	hypothetical protein
A.naphthalenivorans SN2	AMB_00022520	hypothetical protein
A.naphthalenivorans SN2	AMB_00022540	hypothetical protein
A.naphthalenivorans SN2	AMB_00022550	hypothetical protein
A.naphthalenivorans SN2	AMB_00022560	Acyl-CoA synthetases (AMP-forming)/AMP-acid ligases II	K22133	AAE3; oxalate---CoA ligase	Glyoxylate and dicarboxylate metabolism [PATH:ko00630]	Carbohydrate metabolism
A.naphthalenivorans SN2	AMB_00022570	Glycosyltransferase involved in cell wall bisynthesis	K03857	PIGA, GPI3; phosphatidylinositol glycan, class A	Glycosylphosphatidylinositol(GPI)-anchor biosynthesis [PATH:ko00563]	Glycan biosynthesis and metabolism
A.naphthalenivorans SN2	AMB_00022580	Peptidoglycan/LPS O-acetylase OafA/YrhL, contains acyltransferase and SGNH-hydrolase domains
A.naphthalenivorans SN2	AMB_00022590	polymer biosynthesis protein, WecB/TagA/CpsF family
A.naphthalenivorans SN2	AMB_00022600	Glycosyltransferases, probably involved in cell wall biogenesis
A.naphthalenivorans SN2	AMB_00022610	Glycosyltransferase involved in cell wall bisynthesis
A.naphthalenivorans SN2	AMB_00022620	Glycosyltransferase, GT2 family
A.naphthalenivorans SN2	AMB_00022630	Membrane protein involved in the export of O-antigen and
A.naphthalenivorans SN2	AMB_00022640	Uncharacterized conserved protein YafD, endonuclease/exonuclease/phosphatase (EEP) superfamily
A.naphthalenivorans SN2	AMB_00022650	hypothetical protein
A.naphthalenivorans SN2	AMB_00022660	capsular exopolysaccharide family	K16692	etk-wzc; tyrosine-protein kinase Etk/Wzc	Protein kinases [BR:ko01001]	Enzyme families
A.naphthalenivorans SN2	AMB_00022670	polysaccharide export outer membrane protein	K01991	ABC-2.OM, wza; polysaccharide biosynthesis/export protein	Biofilm formation - Escherichia coli [PATH:ko02026]	Cellular community - prokaryotes
A.naphthalenivorans SN2	AMB_00022680	Putative beta-barrel porin 2
A.naphthalenivorans SN2	AMB_00022690	Predicted periplasmic protein
A.naphthalenivorans SN2	AMB_00022700	PEP-CTERM protein-sorting domain-containing protein
A.naphthalenivorans SN2	AMB_00022710	hypothetical protein
A.naphthalenivorans SN2	AMB_00022720	O-antigen ligase
A.naphthalenivorans SN2	AMB_00022740	transferase hexapeptide (six repeat-containing protein)	K00674	dapD; 2,3,4,5-tetrahydropyridine-2,6-dicarboxylate N-succinyltransferase	Lysine biosynthesis [PATH:ko00300]	Amino acid metabolism
A.naphthalenivorans SN2	AMB_00023110	hypothetical protein
A.naphthalenivorans SN2	AMB_00023190	hypothetical protein
A.naphthalenivorans SN2	AMB_00023470	hypothetical protein
A.naphthalenivorans SN2	AMB_00023650	Predicted arabinose efflux permease, MFS family
A.naphthalenivorans SN2	AMB_00024040	Protein involved in biosynthesis of mitomycin antibiotics/polyketide fumonisin
A.naphthalenivorans SN2	AMB_00024050	transcriptional regulator, TetR family
A.naphthalenivorans SN2	AMB_00024710	hypothetical protein
A.naphthalenivorans SN2	AMB_00025250	hypothetical protein
A.naphthalenivorans SN2	AMB_00025630	RNA polymerase sigma-70 factor, ECF subfamily
A.naphthalenivorans SN2	AMB_00025640	hypothetical protein
A.naphthalenivorans SN2	AMB_00025740	Nucleotidyl transferase AbiEii toxin, Type IV TA system
A.naphthalenivorans SN2	AMB_00025770	Predicted transposase YbfD/YdcC associated with H repeats
A.naphthalenivorans SN2	AMB_00025850	Transposase and inactivated derivatives, TnpA family
A.naphthalenivorans SN2	AMB_00025990	2OG-Fe(II) oxygenase superfamily protein
A.naphthalenivorans SN2	AMB_00026000	Flp pilus assembly protein TadD, contains TPR repeats	K09667	OGT; protein O-GlcNAc transferase	Insulin resistance [PATH:ko04931]	Endocrine and metabolic diseases
A.naphthalenivorans SN2	AMB_00026010	Aspartyl/asparaginyl beta-hydroxylase and related dioxygenases	K00476	ASPH; aspartate beta-hydroxylase	Others	Metabolism
A.naphthalenivorans SN2	AMB_00026020	hypothetical protein
A.naphthalenivorans SN2	AMB_00026030	prolyl 4-hydroxylase	K00472	P4HA; prolyl 4-hydroxylase	Arginine and proline metabolism [PATH:ko00330]	Amino acid metabolism
A.naphthalenivorans SN2	AMB_00026040	Outer membrane cobalamin receptor protein	K02014	TC.FEV.OM; iron complex outermembrane recepter protein	Transporters [BR:ko02000]	Membrane transport
A.naphthalenivorans SN2	AMB_00026410	methyl-accepting chemotaxis sensory transducer with Cache sensor	K03406	mcp; methyl-accepting chemotaxis protein	Bacterial motility proteins [BR:ko02035]	Cell motility
A.naphthalenivorans SN2	AMB_00026870	Methyltransferase domain-containing protein
A.naphthalenivorans SN2	AMB_00026880	dTDP-4-amino-4,6-dideoxygalactose transaminase	K02805	wecE, rffA; dTDP-4-amino-4,6-dideoxygalactose transaminase	Amino acid related enzymes [BR:ko01007]	Amino acid metabolism
A.naphthalenivorans SN2	AMB_00026890	WbqC-like protein family protein
A.naphthalenivorans SN2	AMB_00026900	sugar O-acyltransferase, sialic acid O-acetyltransferase NeuD family
A.naphthalenivorans SN2	AMB_00026910	Protein involved in biosynthesis of mitomycin antibiotics/polyketide fumonisin
A.naphthalenivorans SN2	AMB_00026920	Methylase involved in ubiquinone/menaquinone biosynthesis
A.naphthalenivorans SN2	AMB_00026930	4-alpha-L-fucosyltransferase glycosyl transferase group 56
A.naphthalenivorans SN2	AMB_00026940	Stealth protein CR2, conserved region 2	K01784	galE, GALE; UDP-glucose 4-epimerase	Amino sugar and nucleotide sugar metabolism [PATH:ko00520]	Carbohydrate metabolism
A.naphthalenivorans SN2	AMB_00026950	Uncharacterized conserved protein
A.naphthalenivorans SN2	AMB_00028320	hypothetical protein
A.naphthalenivorans SN2	AMB_00028380	ATP-dependent helicase Lhr and Lhr-like helicase	K03724	lhr; ATP-dependent helicase Lhr and Lhr-like helicase	DNA repair and recombination proteins [BR:ko03400]	Replication and repair
A.naphthalenivorans SN2	AMB_00028390	P-loop protein of unknown function (DUF2791)
A.naphthalenivorans SN2	AMB_00028400	Tellurite resistance protein TerB
A.naphthalenivorans SN2	AMB_00028450	Transposase IS66 family protein
A.naphthalenivorans SN2	AMB_00028460	hypothetical protein
A.naphthalenivorans SN2	AMB_00028470	toxin ParE1/3/4
A.naphthalenivorans SN2	AMB_00028480	antitoxin ParD1/3/4
A.naphthalenivorans SN2	AMB_00029080	conserved hypothetical protein
A.naphthalenivorans SN2	AMB_00029110	Transposase InsO and inactivated derivatives	K07497	K07497; putative transposase	Replication, recombination and repair proteins	Genetic information processing
A.naphthalenivorans SN2	AMB_00029120	transposase	K07483	K07483; transposase	Replication, recombination and repair proteins	Genetic information processing
A.naphthalenivorans SN2	AMB_00029140	hypothetical protein
A.naphthalenivorans SN2	AMB_00029150	hypothetical protein
A.naphthalenivorans SN2	AMB_00029160	DnaJ like chaperone protein
A.naphthalenivorans SN2	AMB_00029450	hypothetical protein
A.naphthalenivorans SN2	AMB_00029510	aminobenzoyl-glutamate utilization protein B	K12941	abgB; aminobenzoyl-glutamate utilization protein B	Peptidases [BR:ko01002]	Enzyme families
A.naphthalenivorans SN2	AMB_00029520	Predicted carboxypeptidase
A.naphthalenivorans SN2	AMB_00029530	Outer membrane cobalamin receptor protein	K02014	TC.FEV.OM; iron complex outermembrane recepter protein	Transporters [BR:ko02000]	Membrane transport
A.naphthalenivorans SN2	AMB_00029540	FecR family protein	K07165	fecR; transmembrane sensor	Signal transduction mechanisms	Cellular processes and signaling
A.naphthalenivorans SN2	AMB_00029550	RNA polymerase sigma-70 factor, ECF subfamily	K03088	SIG3.2, rpoE; RNA polymerase sigma-70 factor, ECF subfamily	Transcription machinery [BR:ko03021]	Transcription
A.naphthalenivorans SN2	AMB_00029580	extracellular solute-binding protein, family 3
A.naphthalenivorans SN2	AMB_00029880	Lipid A 3-O-deacylase (PagL)	K12976	pagL; lipid A 3-O-deacylase	Lipopolysaccharide biosynthesis proteins [BR:ko01005]	Glycan biosynthesis and metabolism
A.naphthalenivorans SN2	AMB_00030420	hypothetical protein
A.naphthalenivorans SN2	AMB_00031290	hypothetical protein
A.naphthalenivorans SN2	AMB_00031300	hypothetical protein
A.naphthalenivorans SN2	AMB_00031310	Uncharacterized conserved protein
A.naphthalenivorans SN2	AMB_00031330	hypothetical protein
A.naphthalenivorans SN2	AMB_00031350	hypothetical protein
A.naphthalenivorans SN2	AMB_00031360	hypothetical protein
A.naphthalenivorans SN2	AMB_00031370	hypothetical protein
A.naphthalenivorans SN2	AMB_00031380	hypothetical protein
A.naphthalenivorans SN2	AMB_00031390	hypothetical protein
A.naphthalenivorans SN2	AMB_00031400	HicB family protein
A.naphthalenivorans SN2	AMB_00031410	putative toxin-antitoxin system toxin component, PIN family
A.naphthalenivorans SN2	AMB_00031420	Transposase
A.naphthalenivorans SN2	AMB_00031450	hypothetical protein
A.naphthalenivorans SN2	AMB_00031990	Tetratricopeptide repeat-containing protein	K01021	TPST; protein-tyrosine sulfotransferase	Others	Metabolism
A.naphthalenivorans SN2	AMB_00032000	Outer membrane receptor proteins, mostly Fe transport
A.naphthalenivorans SN2	AMB_00032010	Outer membrane receptor for ferrienterochelin and colicins	K16089	TC.FEV.OM2, cirA, cfrA, hmuR; outer membrane receptor for ferrienterochelin and colicins	Transporters [BR:ko02000]	Membrane transport
A.naphthalenivorans SN2	AMB_00032850	hypothetical protein
A.naphthalenivorans SN2	AMB_00032860	hypothetical protein
A.naphthalenivorans SN2	AMB_00032870	hypothetical protein
A.naphthalenivorans SN2	AMB_00032920	hypothetical protein
A.naphthalenivorans SN2	AMB_00032930	hypothetical protein
A.naphthalenivorans SN2	AMB_00032940	hypothetical protein
A.naphthalenivorans SN2	AMB_00032950	hypothetical protein
A.naphthalenivorans SN2	AMB_00032960	Phage integrase family protein
A.naphthalenivorans SN2	AMB_00033210	hypothetical protein
A.naphthalenivorans SN2	AMB_00033680	hypothetical protein
A.naphthalenivorans SN2	AMB_00033690	Phage integrase family protein
A.naphthalenivorans SN2	AMB_00033700	hypothetical protein
A.naphthalenivorans SN2	AMB_00033710	Predicted ATP-dependent endonuclease of the OLD family, contains P-loop
A.naphthalenivorans SN2	AMB_00033720	hypothetical protein
A.naphthalenivorans SN2	AMB_00033730	hypothetical protein
A.naphthalenivorans SN2	AMB_00033740	hypothetical protein
A.naphthalenivorans SN2	AMB_00033750	Putative transposase
A.naphthalenivorans SN2	AMB_00033760	Glyoxylase, beta-lactamase superfamily II
A.naphthalenivorans SN2	AMB_00033770	hypothetical protein
A.naphthalenivorans SN2	AMB_00033780	Putative SOS response-associated peptidase YedK
A.naphthalenivorans SN2	AMB_00033810	hypothetical protein
A.naphthalenivorans SN2	AMB_00033820	hypothetical protein
A.naphthalenivorans SN2	AMB_00033830	hypothetical protein
A.naphthalenivorans SN2	AMB_00033840	Site-specific recombinase XerD	K04763	xerD; integrase/recombinase XerD	Chromosome and associated proteins [BR:ko03036]	Replication and repair
A.naphthalenivorans SN2	AMB_00033850	AAA+-type ATPase, SpoVK/Ycf46/Vps4 family
A.naphthalenivorans SN2	AMB_00033860	hypothetical protein
A.naphthalenivorans SN2	AMB_00033870	hypothetical protein
A.naphthalenivorans SN2	AMB_00033880	Protein of unknown function (DUF2787)
A.naphthalenivorans SN2	AMB_00033890	ribonuclease HI
A.naphthalenivorans SN2	AMB_00033900	hypothetical protein
A.naphthalenivorans SN2	AMB_00033910	hypothetical protein
A.naphthalenivorans SN2	AMB_00033920	Fic family protein
A.naphthalenivorans SN2	AMB_00033930	hypothetical protein
A.naphthalenivorans SN2	AMB_00033940	hypothetical protein
A.naphthalenivorans SN2	AMB_00033950	hypothetical protein
A.naphthalenivorans SN2	AMB_00033960	hypothetical protein
A.naphthalenivorans SN2	AMB_00033970	Uncharacterized protein conserved in bacteria
A.naphthalenivorans SN2	AMB_00033980	type III restriction enzyme	K01156	res; type III restriction enzyme	Prokaryotic Defense System [BR:ko02048]	Transport and catabolism
A.naphthalenivorans SN2	AMB_00033990	adenine-specific DNA-methyltransferase	K07316	mod; adenine-specific DNA-methyltransferase	Prokaryotic Defense System [BR:ko02048]	Transport and catabolism
A.naphthalenivorans SN2	AMB_00034000	protein of unknown function (DUF4391)
A.naphthalenivorans SN2	AMB_00034010	Superfamily II DNA or RNA helicase, SNF2 family
A.naphthalenivorans SN2	AMB_00034020	hypothetical protein
A.naphthalenivorans SN2	AMB_00034030	hypothetical protein
A.naphthalenivorans SN2	AMB_00034040	hypothetical protein
A.naphthalenivorans SN2	AMB_00034050	Phage integrase family protein
A.naphthalenivorans SN2	AMB_00034060	Site-specific recombinase XerD
A.naphthalenivorans SN2	AMB_00034070	Uncharacterized conserved protein
A.naphthalenivorans SN2	AMB_00034080	hypothetical protein
A.naphthalenivorans SN2	AMB_00034090	hypothetical protein
A.naphthalenivorans SN2	AMB_00034100	hypothetical protein
A.naphthalenivorans SN2	AMB_00034140	Organiser of macrodomain of Terminus of chromosome
A.naphthalenivorans SN2	AMB_00034150	Site-specific DNA recombinase
A.naphthalenivorans SN2	AMB_00034160	hypothetical protein
A.naphthalenivorans SN2	AMB_00034170	Beta protein
A.naphthalenivorans SN2	AMB_00034180	HTH-type transcriptional regulator / antitoxin HigA
A.naphthalenivorans SN2	AMB_00034190	hypothetical protein
A.naphthalenivorans SN2	AMB_00034200	protein of unknown function (DUF4224)
A.naphthalenivorans SN2	AMB_00034210	Site-specific recombinase XerD
A.naphthalenivorans SN2	AMB_00034750	EAL and modified HD-GYP domain-containing signal transduction protein
A.naphthalenivorans SN2	AMB_00034760	hypothetical protein
A.naphthalenivorans SN2	AMB_00034770	Signal transduction histidine kinase	K07677	rcsC; two-component system, NarL family, capsular synthesis sensor histidine kinase RcsC	Biofilm formation - Escherichia coli [PATH:ko02026]	Cellular community - prokaryotes
A.naphthalenivorans SN2	AMB_00034780	Response regulator containing CheY-like receiver, AAA-type ATPase, and DNA-binding
A.naphthalenivorans SN2	AMB_00035160	hypothetical protein
A.naphthalenivorans SN2	AMB_00035170	hypothetical protein
A.naphthalenivorans SN2	AMB_00035180	PLD-like domain-containing protein
A.naphthalenivorans SN2	AMB_00035190	hypothetical protein
A.naphthalenivorans SN2	AMB_00035200	hypothetical protein
A.naphthalenivorans SN2	AMB_00035210	hypothetical protein
A.naphthalenivorans SN2	AMB_00035220	single-strand DNA-binding protein	K03111	ssb; single-strand DNA-binding protein	DNA replication [PATH:ko03030]	Replication and repair
A.naphthalenivorans SN2	AMB_00035230	hypothetical protein
A.naphthalenivorans SN2	AMB_00035240	transposase, IS605 OrfB family, central region	K07496	K07496; putative transposase	Replication, recombination and repair proteins	Genetic information processing
A.naphthalenivorans SN2	AMB_00035250	hypothetical protein
A.naphthalenivorans SN2	AMB_00035260	hypothetical protein
A.naphthalenivorans SN2	AMB_00035270	hypothetical protein
A.naphthalenivorans SN2	AMB_00035280	putative toxin-antitoxin system antitoxin component, TIGR02293 family
A.naphthalenivorans SN2	AMB_00035290	hypothetical protein
A.naphthalenivorans SN2	AMB_00035300	hypothetical protein
A.naphthalenivorans SN2	AMB_00035330	hypothetical protein
A.naphthalenivorans SN2	AMB_00035340	RES domain-containing protein
A.naphthalenivorans SN2	AMB_00035350	Protein of unknown function (DUF2384)
A.naphthalenivorans SN2	AMB_00035360	transcriptional regulator, TetR family	K18301	mexL; TetR/AcrR family transcriptional regulator, mexJK operon transcriptional repressor	Antimicrobial resistance genes [BR:ko01504]	Drug resistance
A.naphthalenivorans SN2	AMB_00035370	RND family efflux transporter, MFP subunit
A.naphthalenivorans SN2	AMB_00035380	Multidrug efflux pump subunit AcrB	K18303	mexK; multidrug efflux pump	Antimicrobial resistance genes [BR:ko01504]	Drug resistance
A.naphthalenivorans SN2	AMB_00035390	Protein of unknown function (DUF938)
A.naphthalenivorans SN2	AMB_00035400	hemerythrin-like metal-binding domain protein
A.naphthalenivorans SN2	AMB_00035420	DDE superfamily endonuclease
A.naphthalenivorans SN2	AMB_00035430	hypothetical protein
A.naphthalenivorans SN2	AMB_00035440	hypothetical protein
A.naphthalenivorans SN2	AMB_00035450	hypothetical protein
A.naphthalenivorans SN2	AMB_00035460	hypothetical protein
A.naphthalenivorans SN2	AMB_00035470	hypothetical protein
A.naphthalenivorans SN2	AMB_00035480	TraL protein
A.naphthalenivorans SN2	AMB_00035490	conjugal transfer pilus assembly protein TraE	K12067	traE; conjugal transfer pilus assembly protein TraE	Secretion system [BR:ko02044]	Membrane transport
A.naphthalenivorans SN2	AMB_00035500	conjugal transfer pilus assembly protein TraK	K12066	traK; conjugal transfer pilus assembly protein TraK	Secretion system [BR:ko02044]	Membrane transport
A.naphthalenivorans SN2	AMB_00035510	conjugal transfer pilus assembly protein TraB	K12065	traB; conjugal transfer pilus assembly protein TraB	Secretion system [BR:ko02044]	Membrane transport
A.naphthalenivorans SN2	AMB_00035520	hypothetical protein
A.naphthalenivorans SN2	AMB_00035530	hypothetical protein
A.naphthalenivorans SN2	AMB_00035540	hypothetical protein
A.naphthalenivorans SN2	AMB_00035550	hypothetical protein
A.naphthalenivorans SN2	AMB_00035560	hypothetical protein
A.naphthalenivorans SN2	AMB_00035570	hypothetical protein
A.naphthalenivorans SN2	AMB_00035580	hypothetical protein
A.naphthalenivorans SN2	AMB_00035590	hypothetical protein
A.naphthalenivorans SN2	AMB_00035600	hypothetical protein
A.naphthalenivorans SN2	AMB_00035610	hypothetical protein
A.naphthalenivorans SN2	AMB_00035620	hypothetical protein
A.naphthalenivorans SN2	AMB_00035630	hypothetical protein
A.naphthalenivorans SN2	AMB_00035640	hypothetical protein
A.naphthalenivorans SN2	AMB_00035680	glutathione S-transferase	K00799	GST, gst; glutathione S-transferase	Chemical carcinogenesis [PATH:ko05204]	Cancers
A.naphthalenivorans SN2	AMB_00035690	prephenate dehydratase	K04518	pheA2; prephenate dehydratase	Phenylalanine, tyrosine and tryptophan biosynthesis [PATH:ko00400]	Amino acid metabolism
A.naphthalenivorans SN2	AMB_00035700	hypothetical protein
A.naphthalenivorans SN2	AMB_00035710	hypothetical protein
A.naphthalenivorans SN2	AMB_00035720	Transposase and inactivated derivatives	K07484	K07484; transposase	Replication, recombination and repair proteins	Genetic information processing
A.naphthalenivorans SN2	AMB_00035740	long-chain fatty acid transport protein
A.naphthalenivorans SN2	AMB_00035750	Transposase	K07484	K07484; transposase	Replication, recombination and repair proteins	Genetic information processing
A.naphthalenivorans SN2	AMB_00035780	long-chain fatty acid transport protein
A.naphthalenivorans SN2	AMB_00035790	2-hydroxychromene-2-carboxylate isomerase
A.naphthalenivorans SN2	AMB_00035800	cis-1,2-dihydro-1,2-dihydroxynaphthalene/dibenzothiophene dihydrodiol dehydrogenase	K05711	hcaB; 2,3-dihydroxy-2,3-dihydrophenylpropionate dehydrogenase	Phenylalanine metabolism [PATH:ko00360]	Amino acid metabolism
A.naphthalenivorans SN2	AMB_00035810	naphthalene 1,2-dioxygenase subunit beta	K05709	hcaF, hcaA2; 3-phenylpropionate/trans-cinnamate dioxygenase subunit beta	Phenylalanine metabolism [PATH:ko00360]	Amino acid metabolism
A.naphthalenivorans SN2	AMB_00035820	naphthalene 1,2-dioxygenase subunit alpha	K05708	hcaE, hcaA1; 3-phenylpropionate/trans-cinnamate dioxygenase subunit alpha	Phenylalanine metabolism [PATH:ko00360]	Amino acid metabolism
A.naphthalenivorans SN2	AMB_00035830	protocatechuate 4,5-dioxygenase, beta chain	K05713	mhpB; 2,3-dihydroxyphenylpropionate 1,2-dioxygenase	Phenylalanine metabolism [PATH:ko00360]	Amino acid metabolism
A.naphthalenivorans SN2	AMB_00035840	hypothetical protein
A.naphthalenivorans SN2	AMB_00035850	trans-o-hydroxybenzylidenepyruvate hydratase-aldolase	K01714	dapA; 4-hydroxy-tetrahydrodipicolinate synthase	Lysine biosynthesis [PATH:ko00300]	Amino acid metabolism
A.naphthalenivorans SN2	AMB_00035860	Acyl-CoA reductase
A.naphthalenivorans SN2	AMB_00035870	3-phenylpropionate/trans-cinnamate dioxygenase ferredoxin subunit	K05710	hcaC; 3-phenylpropionate/trans-cinnamate dioxygenase ferredoxin component	Phenylalanine metabolism [PATH:ko00360]	Amino acid metabolism
A.naphthalenivorans SN2	AMB_00035900	DNA-binding transcriptional regulator, GntR family	K15735	csiR; GntR family transcriptional regulator, carbon starvation induced regulator	Transcription factors [BR:ko03000]	Transcription
A.naphthalenivorans SN2	AMB_00035910	2-keto-4-pentenoate hydratase/2-oxohepta-3-ene-1,7-dioic acid hydratase (catechol pathway)
A.naphthalenivorans SN2	AMB_00035920	Transposase
A.naphthalenivorans SN2	AMB_00035930	2-keto-4-pentenoate hydratase/2-oxohepta-3-ene-1,7-dioic acid hydratase (catechol pathway)
A.naphthalenivorans SN2	AMB_00035940	Uncharacterized conserved protein
A.naphthalenivorans SN2	AMB_00035950	hypothetical protein
A.naphthalenivorans SN2	AMB_00035990	fumarylpyruvate hydrolase	K16165	nagK; fumarylpyruvate hydrolase	Tyrosine metabolism [PATH:ko00350]	Amino acid metabolism
A.naphthalenivorans SN2	AMB_00036000	gentisate 1,2-dioxygenase	K00450	E1.13.11.4; gentisate 1,2-dioxygenase	Tyrosine metabolism [PATH:ko00350]	Amino acid metabolism
A.naphthalenivorans SN2	AMB_00036010	maleylpyruvate isomerase	K01800	maiA, GSTZ1; maleylacetoacetate isomerase	Tyrosine metabolism [PATH:ko00350]	Amino acid metabolism
A.naphthalenivorans SN2	AMB_00036020	DNA-binding transcriptional regulator, LysR family
A.naphthalenivorans SN2	AMB_00036030	DNA-binding transcriptional regulator, LysR family
A.naphthalenivorans SN2	AMB_00036040	salicylate 5-hydroxylase large subunit	K05549	benA-xylX; benzoate/toluate 1,2-dioxygenase subunit alpha	Fluorobenzoate degradation [PATH:ko00364]	Xenobiotics biodegradation and metabolism
A.naphthalenivorans SN2	AMB_00036050	salicylate 5-hydroxylase small subunit
A.naphthalenivorans SN2	AMB_00036060	naphthalene 1,2-dioxygenase system ferredoxin subunit	K05710	hcaC; 3-phenylpropionate/trans-cinnamate dioxygenase ferredoxin component	Phenylalanine metabolism [PATH:ko00360]	Amino acid metabolism
A.naphthalenivorans SN2	AMB_00036070	hypothetical protein
A.naphthalenivorans SN2	AMB_00036080	ferredoxin-NAD(P)+ reductase (naphthalene dioxygenase ferredoxin-specific)	K00523	ascD, ddhD, rfbI; CDP-4-dehydro-6-deoxyglucose reductase, E3	Amino sugar and nucleotide sugar metabolism [PATH:ko00520]	Carbohydrate metabolism
A.naphthalenivorans SN2	AMB_00036090	phospholipase A1	K01058	pldA; phospholipase A1	Linoleic acid metabolism [PATH:ko00591]	Lipid metabolism
A.naphthalenivorans SN2	AMB_00036100	outer membrane protein, multidrug efflux system	K08721	oprJ; outer membrane protein, multidrug efflux system	Transporters [BR:ko02000]	Membrane transport
A.naphthalenivorans SN2	AMB_00036110	multidrug efflux pump	K18307	mexI; multidrug efflux pump	Quorum sensing [PATH:ko02024]	Cellular community - prokaryotes
A.naphthalenivorans SN2	AMB_00036150	hypothetical protein
A.naphthalenivorans SN2	AMB_00036160	hypothetical protein
A.naphthalenivorans SN2	AMB_00036170	protein of unknown function (DUF4158)
A.naphthalenivorans SN2	AMB_00036200	RHH-type transcriptional regulator, rel operon repressor / antitoxin RelB	K18918	relB; RHH-type transcriptional regulator, rel operon repressor / antitoxin RelB	Transcription factors [BR:ko03000]	Transcription
A.naphthalenivorans SN2	AMB_00036210	mRNA interferase RelE/StbE	K06218	relE, stbE; mRNA interferase RelE/StbE	Prokaryotic Defense System [BR:ko02048]	Transport and catabolism
A.naphthalenivorans SN2	AMB_00036220	methyl-accepting chemotaxis protein
A.naphthalenivorans SN2	AMB_00036230	Transposase DDE domain-containing protein
A.naphthalenivorans SN2	AMB_00036490	hypothetical protein
A.naphthalenivorans SN2	AMB_00036500	Predicted amidohydrolase
A.naphthalenivorans SN2	AMB_00036560	hypothetical protein
A.naphthalenivorans SN2	AMB_00036860	RHS repeat-associated core domain-containing protein
A.naphthalenivorans SN2	AMB_00036870	hypothetical protein
A.naphthalenivorans SN2	AMB_00036880	Nucleotidyl transferase AbiEii toxin, Type IV TA system
A.naphthalenivorans SN2	AMB_00037040	hypothetical protein
A.naphthalenivorans SN2	AMB_00037150	restriction system protein
A.naphthalenivorans SN2	AMB_00037220	hypothetical protein
A.naphthalenivorans SN2	AMB_00037230	hypothetical protein
A.naphthalenivorans SN2	AMB_00037780	Glycosyltransferase, GT2 family
A.naphthalenivorans SN2	AMB_00037830	hypothetical protein
A.naphthalenivorans SN2	AMB_00037840	hypothetical protein
A.naphthalenivorans SN2	AMB_00037850	hypothetical protein
A.naphthalenivorans SN2	AMB_00037860	conserved repeat domain-containing protein
A.naphthalenivorans SN2	AMB_00037870	Protein of unknown function (DUF563)
A.naphthalenivorans SN2	AMB_00037880	hypothetical protein
A.naphthalenivorans SN2	AMB_00037890	Sulfotransferase family protein
A.naphthalenivorans SN2	AMB_00037900	Glycosyltransferase involved in cell wall bisynthesis
A.naphthalenivorans SN2	AMB_00037910	Glycosyltransferase, GT2 family
A.naphthalenivorans SN2	AMB_00037920	Methyltransferase domain-containing protein
A.naphthalenivorans SN2	AMB_00037930	hypothetical protein
A.naphthalenivorans SN2	AMB_00037940	hypothetical protein
A.naphthalenivorans SN2	AMB_00037950	capsule biosynthesis phosphatase
A.naphthalenivorans SN2	AMB_00037960	Acetyltransferase (isoleucine patch superfamily)
A.naphthalenivorans SN2	AMB_00037970	Glycosyltransferase involved in cell wall bisynthesis
A.naphthalenivorans SN2	AMB_00037980	Glycosyltransferase, GT2 family
A.naphthalenivorans SN2	AMB_00037990	Transposase	K07484	K07484; transposase	Replication, recombination and repair proteins	Genetic information processing
A.naphthalenivorans SN2	AMB_00038020	hypothetical protein
A.naphthalenivorans SN2	AMB_00038030	parallel beta-helix repeat (two copies)
A.naphthalenivorans SN2	AMB_00038040	hypothetical protein
A.naphthalenivorans SN2	AMB_00038050	hypothetical protein
A.naphthalenivorans SN2	AMB_00038060	Uncharacterized conserved protein
A.naphthalenivorans SN2	AMB_00038070	Glycosyl transferases group 1
A.naphthalenivorans SN2	AMB_00038080	hypothetical protein
A.naphthalenivorans SN2	AMB_00038090	Glycosyl transferase family 2
A.naphthalenivorans SN2	AMB_00038100	hypothetical protein
A.naphthalenivorans SN2	AMB_00038110	Lipopolysaccharide biosynthesis protein	K07272	rgpF; rhamnosyltransferase	Lipopolysaccharide biosynthesis proteins [BR:ko01005]	Glycan biosynthesis and metabolism
A.naphthalenivorans SN2	AMB_00038120	hypothetical protein
A.naphthalenivorans SN2	AMB_00038410	hypothetical protein
A.naphthalenivorans SN2	AMB_00039970	RND family efflux transporter, MFP subunit	K07799	mdtA; membrane fusion protein, multidrug efflux system	Transporters [BR:ko02000]	Membrane transport
A.naphthalenivorans SN2	AMB_00039980	Multidrug efflux pump subunit AcrB
A.naphthalenivorans SN2	AMB_00039990	hypothetical protein
A.naphthalenivorans SN2	AMB_00040060	hypothetical protein
A.naphthalenivorans SN2	AMB_00040460	hypothetical protein
A.naphthalenivorans SN2	AMB_00040590	Protein of unknown function (DUF2892)
A.naphthalenivorans SN2	AMB_00041060	hypothetical protein
A.naphthalenivorans SN2	AMB_00041070	hypothetical protein
A.naphthalenivorans SN2	AMB_00041260	hypothetical protein
A.naphthalenivorans SN2	AMB_00041270	urease accessory protein	K03189	ureG; urease accessory protein	Protein folding and associated processing	Genetic information processing
A.naphthalenivorans SN2	AMB_00041280	urease accessory protein	K03188	ureF; urease accessory protein	Protein folding and associated processing	Genetic information processing
A.naphthalenivorans SN2	AMB_00041290	urease accessory protein	K03187	ureE; urease accessory protein	Protein folding and associated processing	Genetic information processing
A.naphthalenivorans SN2	AMB_00041300	urease. Metallo peptidase. MEROPS family M38	K01428	ureC; urease subunit alpha	Arginine biosynthesis [PATH:ko00220]	Amino acid metabolism
A.naphthalenivorans SN2	AMB_00041310	urease subunit beta	K01429	ureB; urease subunit beta	Arginine biosynthesis [PATH:ko00220]	Amino acid metabolism
A.naphthalenivorans SN2	AMB_00041320	urease subunit gamma	K01430	ureA; urease subunit gamma	Arginine biosynthesis [PATH:ko00220]	Amino acid metabolism
A.naphthalenivorans SN2	AMB_00041330	urease accessory protein	K03190	ureD, ureH; urease accessory protein	Protein folding and associated processing	Genetic information processing
A.naphthalenivorans SN2	AMB_00041340	amino acid/amide ABC transporter ATP-binding protein 2, HAAT family	K11963	urtE; urea transport system ATP-binding protein	Transporters [BR:ko02000]	Membrane transport
A.naphthalenivorans SN2	AMB_00041350	urea transport system ATP-binding protein	K11962	urtD; urea transport system ATP-binding protein	ABC transporters [PATH:ko02010]	Membrane transport
A.naphthalenivorans SN2	AMB_00041360	amino acid/amide ABC transporter membrane protein 2, HAAT family	K11961	urtC; urea transport system permease protein	Transporters [BR:ko02000]	Membrane transport
A.naphthalenivorans SN2	AMB_00041370	amino acid/amide ABC transporter membrane protein 1, HAAT family	K11960	urtB; urea transport system permease protein	Transporters [BR:ko02000]	Membrane transport
A.naphthalenivorans SN2	AMB_00041380	amino acid/amide ABC transporter substrate-binding protein, HAAT family	K11959	urtA; urea transport system substrate-binding protein	ABC transporters [PATH:ko02010]	Membrane transport
A.naphthalenivorans SN2	AMB_00041390	Putative beta-barrel porin-2, OmpL-like. bbp2
A.naphthalenivorans SN2	AMB_00041400	Signal transduction histidine kinase	K11527	K11527; two-component system, sensor histidine kinase and response regulator	Protein kinases [BR:ko01001]	Enzyme families
A.naphthalenivorans SN2	AMB_00041410	two component transcriptional regulator, LuxR family	K11527	K11527; two-component system, sensor histidine kinase and response regulator	Protein kinases [BR:ko01001]	Enzyme families
A.naphthalenivorans SN2	AMB_00041450	hypothetical protein
A.naphthalenivorans SN2	AMB_00041460	hypothetical protein
A.naphthalenivorans SN2	AMB_00041470	hypothetical protein
A.naphthalenivorans SN2	AMB_00041480	hypothetical protein
A.naphthalenivorans SN2	AMB_00041490	Periplasmic serine proteases (ClpP class)
A.naphthalenivorans SN2	AMB_00041500	hypothetical protein
A.naphthalenivorans SN2	AMB_00041510	hypothetical protein
A.naphthalenivorans SN2	AMB_00041520	Protein of unknown function (DUF2971)
A.naphthalenivorans SN2	AMB_00041530	transcriptional regulator, AlpA family
A.naphthalenivorans SN2	AMB_00041550	hypothetical protein
A.naphthalenivorans SN2	AMB_00041560	Protein of unknown function (DUF2857)
A.naphthalenivorans SN2	AMB_00041570	hypothetical protein
A.naphthalenivorans SN2	AMB_00041580	hypothetical protein
A.naphthalenivorans SN2	AMB_00041590	DNA repair protein RadC	K03630	radC; DNA repair protein RadC	Replication, recombination and repair proteins	Genetic information processing
A.naphthalenivorans SN2	AMB_00041600	Protein of unknown function (DUF3577)
A.naphthalenivorans SN2	AMB_00041610	TraG-like protein, N-terminal region
A.naphthalenivorans SN2	AMB_00041620	integrating conjugative element protein, PFL_4711 family
A.naphthalenivorans SN2	AMB_00041630	integrating conjugative element protein, PFL_4710 family
A.naphthalenivorans SN2	AMB_00041640	integrating conjugative element protein, PFL_4709 family
A.naphthalenivorans SN2	AMB_00041650	hypothetical protein
A.naphthalenivorans SN2	AMB_00041660	conjugative transfer ATPase, PFL_4706 family
A.naphthalenivorans SN2	AMB_00041670	conjugative transfer region lipoprotein, TIGR03751 family
A.naphthalenivorans SN2	AMB_00041680	integrating conjugative element protein, PFL_4705 family
A.naphthalenivorans SN2	AMB_00041690	integrating conjugative element protein, PFL_4704 family
A.naphthalenivorans SN2	AMB_00041700	integrating conjugative element protein, PFL_4703 family
A.naphthalenivorans SN2	AMB_00041710	conjugative transfer region protein, TIGR03750 family
A.naphthalenivorans SN2	AMB_00041720	integrating conjugative element membrane protein, PFL_4702 family
A.naphthalenivorans SN2	AMB_00041730	integrating conjugative element protein, PFL_4701 family
A.naphthalenivorans SN2	AMB_00041740	integrative conjugative element protein, RAQPRD family
A.naphthalenivorans SN2	AMB_00041750	Predicted P-loop ATPase, KAP-like
A.naphthalenivorans SN2	AMB_00041760	hypothetical protein
A.naphthalenivorans SN2	AMB_00041770	7-cyano-7-deazaguanine synthase (queuosine biosynthesis)
A.naphthalenivorans SN2	AMB_00041780	TatD DNase family protein	K03424	tatD; TatD DNase family protein	Replication, recombination and repair proteins	Genetic information processing
A.naphthalenivorans SN2	AMB_00041790	Predicted esterase of the alpha-beta hydrolase superfamily
A.naphthalenivorans SN2	AMB_00041800	glutamate:Na+ symporter, ESS family	K03312	gltS; glutamate:Na+ symporter, ESS family	Transporters [BR:ko02000]	Membrane transport
A.naphthalenivorans SN2	AMB_00041810	voltage-gated potassium channel
A.naphthalenivorans SN2	AMB_00041820	hypothetical protein
A.naphthalenivorans SN2	AMB_00041830	efflux transporter, outer membrane factor (OMF) lipoprotein, NodT family
A.naphthalenivorans SN2	AMB_00041840	RND family efflux transporter, MFP subunit	K01993	ABC-2.TX; HlyD family secretion protein	Membrane and intracellular structural molecules	Cellular processes and signaling
A.naphthalenivorans SN2	AMB_00041850	Multidrug efflux pump subunit AcrB	K15726	czcA; cobalt-zinc-cadmium resistance protein CzcA	Transporters [BR:ko02000]	Membrane transport
A.naphthalenivorans SN2	AMB_00041860	hypothetical protein
A.naphthalenivorans SN2	AMB_00041870	Protein of unknown function (DUF3313)
A.naphthalenivorans SN2	AMB_00041880	hypothetical protein
A.naphthalenivorans SN2	AMB_00041890	Predicted hydrolases or acyltransferases (alpha/beta hydrolase superfamily)
A.naphthalenivorans SN2	AMB_00041900	integrating conjugative element membrane protein, PFL_4697 family
A.naphthalenivorans SN2	AMB_00041910	conjugative coupling factor TraD, TOL family
A.naphthalenivorans SN2	AMB_00041920	integrating conjugative element protein, PFL_4695 family
A.naphthalenivorans SN2	AMB_00041930	Transglycosylase SLT domain-containing protein
A.naphthalenivorans SN2	AMB_00041940	integrating conjugative element protein, PFL_4693 family
A.naphthalenivorans SN2	AMB_00041950	type IV pili sensor histidine kinase and response regulator
A.naphthalenivorans SN2	AMB_00041960	hypothetical protein
A.naphthalenivorans SN2	AMB_00041970	hypothetical protein
A.naphthalenivorans SN2	AMB_00041980	Integrase
A.naphthalenivorans SN2	AMB_00041990	hypothetical protein
A.naphthalenivorans SN2	AMB_00042000	chromosome partitioning protein, ParB family	K03497	parB, spo0J; chromosome partitioning protein, ParB family	Cytoskeleton proteins [BR:ko04812]	Cell motility
A.naphthalenivorans SN2	AMB_00042010	Helix-turn-helix domain-containing protein
A.naphthalenivorans SN2	AMB_00042020	Phage-related protein
A.naphthalenivorans SN2	AMB_00042030	Integrase
A.naphthalenivorans SN2	AMB_00042200	Phage integrase family protein
A.naphthalenivorans SN2	AMB_00042210	hypothetical protein
A.naphthalenivorans SN2	AMB_00042220	hypothetical protein
A.naphthalenivorans SN2	AMB_00042230	hypothetical protein
A.naphthalenivorans SN2	AMB_00042240	Fusaric acid resistance protein-like
A.naphthalenivorans SN2	AMB_00042250	cytochrome b561
A.naphthalenivorans SN2	AMB_00042260	Predicted oxidoreductase
A.naphthalenivorans SN2	AMB_00042270	NAD(P)-dependent dehydrogenase, short-chain alcohol dehydrogenase family
A.naphthalenivorans SN2	AMB_00042280	Aromatic ring-opening dioxygenase, catalytic subunit, LigB family	K15777	DOPA; 4,5-DOPA dioxygenase extradiol	Betalain biosynthesis [PATH:ko00965]	Biosynthesis of other secondary metabolites
A.naphthalenivorans SN2	AMB_00042290	DNA-binding transcriptional regulator, LysR family
A.naphthalenivorans SN2	AMB_00042300	DNA replication protein DnaC
A.naphthalenivorans SN2	AMB_00042440	Multidrug efflux pump subunit AcrB	K11326	nrsA, czcA; cation efflux system protein involved in nickel and cobalt tolerance	Transporters [BR:ko02000]	Membrane transport
A.naphthalenivorans SN2	AMB_00042450	RND family efflux transporter, MFP subunit
A.naphthalenivorans SN2	AMB_00042460	transcriptional regulator, TetR family
A.naphthalenivorans SN2	AMB_00042470	ABC transporter transmembrane region
A.naphthalenivorans SN2	AMB_00042480	Signal transduction histidine kinase
A.naphthalenivorans SN2	AMB_00042490	DNA-binding response regulator, OmpR family, contains REC and winged-helix
A.naphthalenivorans SN2	AMB_00042500	diaminopimelate decarboxylase	K01586	lysA; diaminopimelate decarboxylase	Lysine biosynthesis [PATH:ko00300]	Amino acid metabolism
A.naphthalenivorans SN2	AMB_00042510	acyl-CoA ligase (AMP-forming), exosortase A-associated	K01897	ACSL, fadD; long-chain acyl-CoA synthetase	Ferroptosis [PATH:ko04216]	Cell growth and death
A.naphthalenivorans SN2	AMB_00042530	ATP-binding cassette, subfamily B, MsbA	K11085	msbA; ATP-binding cassette, subfamily B, bacterial MsbA	Transporters [BR:ko02000]	Membrane transport
A.naphthalenivorans SN2	AMB_00042540	KDO2-lipid IV(A) lauroyltransferase
A.naphthalenivorans SN2	AMB_00042550	Phosphopantetheine attachment site
A.naphthalenivorans SN2	AMB_00042570	transcriptional regulator, TetR family
A.naphthalenivorans SN2	AMB_00042580	Transposase DDE domain-containing protein
A.naphthalenivorans SN2	AMB_00042590	hypothetical protein
A.naphthalenivorans SN2	AMB_00042600	hypothetical protein
A.naphthalenivorans SN2	AMB_00042610	hypothetical protein
A.naphthalenivorans SN2	AMB_00042620	hypothetical protein
A.naphthalenivorans SN2	AMB_00042630	IS66 C-terminal element
A.naphthalenivorans SN2	AMB_00042640	TonB dependent receptor.
A.naphthalenivorans SN2	AMB_00043040	hypothetical protein
A.naphthalenivorans SN2	AMB_00043050	DNA (cytosine-5)-methyltransferase 1	K00558	DNMT1, dcm; DNA (cytosine-5)-methyltransferase 1	Cysteine and methionine metabolism [PATH:ko00270]	Amino acid metabolism
A.naphthalenivorans SN2	AMB_00043060	hypothetical protein
A.naphthalenivorans SN2	AMB_00043070	Protein of unknown function DUF262
A.naphthalenivorans SN2	AMB_00043080	hypothetical protein
A.naphthalenivorans SN2	AMB_00043110	hypothetical protein
A.naphthalenivorans SN2	AMB_00043120	Predicted ATPase
A.naphthalenivorans SN2	AMB_00043130	hypothetical protein
A.naphthalenivorans SN2	AMB_00043140	transposase
A.naphthalenivorans SN2	AMB_00043160	hypothetical protein
A.naphthalenivorans SN2	AMB_00043170	Phage-integrase repeat unit
A.naphthalenivorans SN2	AMB_00043180	Site-specific recombinase XerD
A.naphthalenivorans SN2	AMB_00043190	hypothetical protein
A.naphthalenivorans SN2	AMB_00043850	Integrase
A.naphthalenivorans SN2	AMB_00043860	hypothetical protein
A.naphthalenivorans SN2	AMB_00043870	mRNA interferase HigB	K19166	higB; mRNA interferase HigB	Prokaryotic Defense System [BR:ko02048]	Transport and catabolism
A.naphthalenivorans SN2	AMB_00043880	HTH-type transcriptional regulator / antitoxin HigA	K18831	higA; HTH-type transcriptional regulator / antitoxin HigA	Transcription factors [BR:ko03000]	Transcription
A.naphthalenivorans SN2	AMB_00043900	hypothetical protein
A.naphthalenivorans SN2	AMB_00043910	Replicative superfamily II helicase	K12598	MTR4, SKIV2L2; ATP-dependent RNA helicase DOB1	RNA degradation [PATH:ko03018]	Folding, sorting and degradation
A.naphthalenivorans SN2	AMB_00043920	hypothetical protein
A.naphthalenivorans SN2	AMB_00043930	type I restriction enzyme, S subunit
A.naphthalenivorans SN2	AMB_00043940	type I restriction enzyme M protein
A.naphthalenivorans SN2	AMB_00043950	type I restriction enzyme, R subunit	K17677	IRC3; ATP-dependent helicase IRC3	Mitochondrial biogenesis [BR:ko03029]	Translation
A.naphthalenivorans SN2	AMB_00043960	transcriptional regulator, AlpA family
A.naphthalenivorans SN2	AMB_00043970	Uncharcterized protein, DUF927 family
A.naphthalenivorans SN2	AMB_00043980	transcriptional regulator, AlpA family
A.naphthalenivorans SN2	AMB_00043990	serine/threonine-protein kinase HipA
A.naphthalenivorans SN2	AMB_00044000	Cro/C1-type HTH DNA-binding domain-containing protein
A.naphthalenivorans SN2	AMB_00044010	hypothetical protein
A.naphthalenivorans SN2	AMB_00044020	hypothetical protein
A.naphthalenivorans SN2	AMB_00044030	serine/threonine-protein kinase HipA
A.naphthalenivorans SN2	AMB_00044040	Helix-turn-helix domain-containing protein
A.naphthalenivorans SN2	AMB_00044060	Uncharacterized conserved protein, DUF1330 family
